# Supplementary material for: Benchmarking Machine Learning Methods for Synthetic Lethality Prediction in Cancer
Source: Research Square preprint supplement (doi:10.21203/rs.3.rs-3671637/v1), 2024-01-05
Supplement: Supplementary file 1 [file 91be01bbb0fdae68278a9e11.xlsx]

## Sheet: Summary of all metrics
This table summarizes the results of all models in all scenarios, consisting of 11 methods (SL2MF,SLMGAE,CMFW,DDGCN,GCATSL,GRSMF,KG4SL,MGE4SL,NSF4SL,PiLSL, and PTGNN), 3 data spliting methods (CV1, CV2, and CV3), 3 negative sampling methods (Random, Exp, and Dep), and 4 positive and negative sample ratios (1, 5, 20, and 50).
Model	SL2MF	SLMGAE	CMFW	DDGCN	GCATSL	GRSMF	KG4SL	MGE4SL	NSF4SL	PiLSL	PTGNN	SL2MF	SLMGAE	CMFW	DDGCN	GCATSL	GRSMF	KG4SL	MGE4SL	NSF4SL	PiLSL	PTGNN	SL2MF	SLMGAE	CMFW	DDGCN	GCATSL	GRSMF	KG4SL	MGE4SL	NSF4SL	PiLSL	PTGNN
NSM	Random	Random	Random	Random	Random	Random	Random	Random	Random	Random	Random	Exp	Exp	Exp	Exp	Exp	Exp	Exp	Exp	Exp	Exp	Exp	Dep	Dep	Dep	Dep	Dep	Dep	Dep	Dep	Dep	Dep	Dep
CV1,1,AUROC	0.781151	0.934385	0.781701	0.85278	0.942939	0.905972	0.941011	0.704778	0.931874	0.926907	0.925473	0.770866	0.976358	0.476025	0.942209	0.988928	0.906736	0.989423	0.710303	0.916525	0.984545	0.961076	0.771722	0.967865	0.444565	0.899574	0.988547	0.884861	0.988343	0.721218	0.892497	0.981453	0.947374
CV1,1,AUPR	0.863328	0.950375	0.830031	0.904626	0.951174	0.933023	0.95017	0.668142	0.945346	0.933839	0.938798	0.858593	0.979967	0.573155	0.95378	0.990226	0.935375	0.990635	0.694113	0.93595	0.985747	0.967322	0.851237	0.971888	0.572228	0.927712	0.988466	0.91754	0.988566	0.681199	0.901678	0.981703	0.956166
CV1,1,F1	0.766195	0.883208	0.716639	0.838892	0.882914	0.848834	0.878338	0.697068	0.869125	0.863193	0.86871	0.772531	0.933905	0.666667	0.898937	0.957	0.859313	0.954195	0.690138	0.861438	0.949029	0.917764	0.745391	0.914686	0.666667	0.872726	0.950101	0.839863	0.948071	0.707591	0.82504	0.941567	0.90374
CV1,1,N10	0.280718	0.269856	0.239014	0.156799	0.264178	0.284386	0.250527	0.00278577	0.227891		0.23576	0.279325	0.226418	0.239791	0.0955145	0.256036	0.282648	0.231115	0.00257137	0.243242		0.235012	0.279325	0.233258	0.24337	0.0594343	0.263059	0.282594	0.236921	0.00262836	0.243242		0.234461
CV1,1,N20	0.291726	0.292666	0.25725	0.175034	0.285135	0.296546	0.270609	0.00431449	0.25073		0.252501	0.290725	0.247364	0.249472	0.104245	0.27488	0.295221	0.247225	0.00393547	0.264416		0.251945	0.290725	0.255264	0.253546	0.0654728	0.28187	0.295307	0.255016	0.00394964	0.264416		0.252764
CV1,1,N50	0.310969	0.315955	0.27436	0.199579	0.297605	0.315276	0.285265	0.00709948	0.270618		0.273993	0.309852	0.265106	0.257756	0.11228	0.292068	0.312118	0.268672	0.00530409	0.283944		0.271856	0.309852	0.27392	0.263171	0.0725179	0.296898	0.312029	0.274951	0.00530459	0.283944		0.271733
CV1,1,R10	0.264169	0.319777	0.325741	0.23797	0.336263	0.365875	0.334731	0.00202068	0.352612		0.336118	0.263023	0.268305	0.313495	0.1705	0.334767	0.364364	0.296067	0.00166952	0.357406		0.336685	0.263023	0.275172	0.323463	0.115227	0.332283	0.364348	0.28537	0.00169911	0.357406		0.336638
CV1,1,R20	0.291028	0.377786	0.367675	0.28172	0.389109	0.397257	0.386341	0.00391794	0.410848		0.378141	0.291385	0.31851	0.341283	0.197041	0.379034	0.396003	0.334557	0.00267555	0.412457		0.379267	0.291385	0.33075	0.347252	0.133756	0.375294	0.396273	0.331408	0.00271211	0.412457		0.382739
CV1,1,R50	0.340107	0.442112	0.409739	0.344676	0.420346	0.44599	0.425319	0.0084624	0.462401		0.432282	0.339175	0.371571	0.359859	0.22528	0.420898	0.4405	0.403546	0.0049843	0.462522		0.428621	0.339175	0.386642	0.366287	0.158389	0.413314	0.441156	0.391236	0.00497512	0.462522		0.430013
CV1,1,P10	0.26942	0.322245	0.3267	0.238544	0.337189	0.3683	0.33567	0.00216123	0.356278		0.337173	0.268236	0.26939	0.314275	0.17062	0.335705	0.366454	0.296857	0.00183154	0.361214		0.337711	0.268236	0.276242	0.324348	0.11527	0.333149	0.366396	0.286118	0.00187864	0.361214		0.33765
CV1,1,P20	0.292415	0.378529	0.368023	0.281879	0.389355	0.397971	0.386592	0.00399392	0.412569		0.378495	0.292809	0.318874	0.341495	0.197122	0.379355	0.396608	0.334752	0.00277244	0.414128		0.379607	0.292809	0.331094	0.347502	0.133793	0.375559	0.396853	0.331581	0.002809	0.414128		0.383072
CV1,1,P50	0.340674	0.442215	0.409833	0.344714	0.420424	0.446111	0.425399	0.00851093	0.462569		0.432386	0.339746	0.371671	0.359921	0.225324	0.420988	0.440609	0.40363	0.00503864	0.4627		0.428722	0.339746	0.386741	0.366368	0.158419	0.41339	0.441259	0.391296	0.00502946	0.4627		0.430109
CV1,1,M10	0.28611	0.251387	0.204313	0.127971	0.235383	0.256787	0.217525	0.00183667	0.188112		0.19484	0.285046	0.210169	0.203236	0.0688983	0.22575	0.254901	0.20361	0.00215561	0.206349		0.194608	0.285046	0.216662	0.2041	0.0391331	0.234824	0.254907	0.217368	0.00238361	0.206349		0.193523
CV1,1,M20	0.282075	0.250443	0.208088	0.131622	0.24082	0.25743	0.222812	0.00218637	0.185667		0.197974	0.280798	0.215403	0.204703	0.0707309	0.229315	0.255552	0.207688	0.00248768	0.203829		0.197902	0.280798	0.220095	0.205865	0.0404315	0.239158	0.255665	0.222362	0.00268137	0.203829		0.197232
CV1,1,M50	0.276884	0.246901	0.206919	0.132083	0.238212	0.252124	0.220789	0.00244504	0.181782		0.197464	0.275762	0.212328	0.203896	0.0717545	0.227815	0.250243	0.205088	0.0026694	0.199471		0.197369	0.275762	0.218035	0.204599	0.0412438	0.23698	0.250442	0.220019	0.00285444	0.199471		0.196808
CV2,1,AUROC	0.30271	0.853488	0.592987	0.783002	0.838555	0.803001	0.806178	0.580464	0.770303	0.788776	0.789848	0.260105	0.900501	0.476995	0.842719	0.943957	0.808107	0.917989	0.580839	0.73684	0.893254	0.779425	0.346863	0.876269	0.475123	0.87691	0.940394	0.774004	0.937736	0.616916	0.694812	0.90811	0.787655
CV2,1,AUPR	0.434164	0.872979	0.673757	0.815227	0.864729	0.843211	0.839326	0.557934	0.798784	0.816976	0.819352	0.412988	0.914485	0.538956	0.866216	0.94579	0.856177	0.922821	0.57771	0.772222	0.899391	0.814838	0.470441	0.888803	0.540859	0.889907	0.94066	0.825307	0.941148	0.596218	0.726353	0.918503	0.819408
CV2,1,F1	0.666667	0.77897	0.667753	0.742784	0.774873	0.750494	0.740032	0.669959	0.709275	0.7231	0.732776	0.674332	0.833538	0.67447	0.802948	0.885915	0.760306	0.843502	0.67582	0.700146	0.815824	0.731856	0.673409	0.804435	0.673409	0.823428	0.891032	0.727097	0.875056	0.677397	0.682524	0.839066	0.731284
CV2,1,N10	0.00523489	0.100573	0.11608	0.00750816	0.121539	0.104004	0.108224	0.00391554	0.104293		0.120272	0.00523489	0.0646301	0.115987	0.00284921	0.120731	0.103616	0.108953	0.00383401	0.0995271		0.119412	0.00523489	0.0759847	0.117637	0.00240297	0.121712	0.104009	0.100015	0.00401868	0.0995271		0.11943
CV2,1,N20	0.00619496	0.115169	0.120734	0.0116104	0.126734	0.107362	0.1128	0.00545166	0.118212		0.125257	0.00619496	0.0819482	0.119669	0.0044107	0.126282	0.107201	0.113334	0.00550178	0.114819		0.125425	0.00619496	0.095316	0.121217	0.00372307	0.127256	0.107549	0.105991	0.0055574	0.114819		0.125011
CV2,1,N50	0.00783057	0.132641	0.127209	0.0212176	0.132181	0.114905	0.120278	0.00837208	0.13532		0.130745	0.00783057	0.102937	0.123658	0.00808037	0.132015	0.11477	0.124963	0.00881489	0.124445		0.131441	0.00783057	0.117761	0.125565	0.00682064	0.133489	0.115117	0.114169	0.00857243	0.124445		0.131775
CV2,1,R10	0.00413212	0.12443	0.134559	0.00831029	0.139415	0.120838	0.140161	0.00343642	0.149111		0.138381	0.00413212	0.0800294	0.129833	0.0026668	0.137793	0.120645	0.115118	0.00262894	0.134725		0.140248	0.00413212	0.0924849	0.133001	0.00260349	0.140508	0.120645	0.115743	0.00189053	0.134725		0.140479
CV2,1,R20	0.00580347	0.160643	0.143041	0.0168796	0.146795	0.127362	0.149956	0.00631735	0.179849		0.14781	0.00580347	0.125962	0.13798	0.00482084	0.146236	0.127402	0.126126	0.00506053	0.176034		0.153192	0.00580347	0.141229	0.139138	0.00440083	0.151505	0.127359	0.130467	0.00349637	0.176034		0.152251
CV2,1,R50	0.00892185	0.207469	0.154018	0.0424076	0.153674	0.142272	0.164396	0.0121562	0.234549		0.158003	0.00892185	0.194081	0.143843	0.0123148	0.155187	0.142244	0.1555	0.0107739	0.19709		0.161957	0.00892185	0.209425	0.144907	0.00949908	0.160987	0.142043	0.147697	0.00843561	0.19709		0.163493
CV2,1,P10	0.00464227	0.127034	0.137376	0.0087384	0.142174	0.123582	0.142793	0.00366718	0.152089		0.141082	0.00464227	0.0819377	0.132174	0.00280601	0.140559	0.123358	0.118272	0.00286734	0.137748		0.142872	0.00464227	0.0949334	0.13561	0.00273465	0.14309	0.123358	0.118828	0.00218869	0.137748		0.143239
CV2,1,P20	0.00604474	0.161742	0.144402	0.0171413	0.14795	0.128388	0.150973	0.00646644	0.181203		0.148903	0.00604474	0.126781	0.138728	0.00490816	0.147443	0.128436	0.127101	0.00521211	0.177452		0.154315	0.00604474	0.142025	0.140107	0.0044952	0.152469	0.128376	0.131434	0.00366617	0.177452		0.153391
CV2,1,P50	0.00906882	0.207741	0.154317	0.0425173	0.153929	0.142528	0.164637	0.0122466	0.235036		0.158228	0.00906882	0.194299	0.144006	0.0123518	0.155448	0.142506	0.155759	0.010855	0.197618		0.162224	0.00906882	0.209614	0.145134	0.00953812	0.161187	0.142302	0.147914	0.00852449	0.197618		0.163756
CV2,1,M10	0.00488216	0.0854967	0.102905	0.00647153	0.104335	0.0934417	0.0902042	0.00327806	0.0811278		0.101474	0.00488216	0.0582525	0.102193	0.00222256	0.1043	0.0930223	0.102974	0.0028137	0.078473		0.102533	0.00488216	0.0692861	0.102332	0.00195807	0.103452	0.0937248	0.091334	0.00276385	0.078473		0.102241
CV2,1,M20	0.00498089	0.0877065	0.102175	0.00756888	0.103833	0.0941732	0.0906566	0.00388268	0.0823906		0.100967	0.00498089	0.0599669	0.101635	0.00256212	0.103835	0.0936586	0.104004	0.00330781	0.0796306		0.101443	0.00498089	0.06689	0.101646	0.00234344	0.103762	0.0944353	0.0918423	0.00317668	0.0796306		0.101528
CV2,1,M50	0.00502046	0.0873256	0.100318	0.00843503	0.10219	0.0905897	0.0886523	0.00425671	0.0807154		0.0990889	0.00502046	0.0571756	0.0993325	0.00306593	0.102318	0.0902376	0.0994545	0.00380346	0.0775194		0.0990755	0.00502046	0.0657744	0.0995399	0.0028003	0.103169	0.0908497	0.0896739	0.00352525	0.0775194		0.099481
CV3,1,AUROC	0.376405	0.790137	0.49131	0.485167	0.678306	0.655802	0.562454	0.529656	0.683421	0.62585	0.528674	0.346656	0.804028	0.443677	0.479959	0.751152	0.699711	0.557981	0.528971	0.690972	0.572866	0.539072	0.488477	0.772068	0.493534	0.466406	0.682874	0.530181	0.564809	0.533045	0.563835	0.574829	0.53459
CV3,1,AUPR	0.411853	0.796439	0.503148	0.545509	0.660368	0.614246	0.575157	0.549265	0.695341	0.629635	0.516895	0.423226	0.833528	0.507332	0.553679	0.766736	0.698411	0.60211	0.563122	0.724784	0.602912	0.566432	0.505514	0.785695	0.519751	0.54828	0.683169	0.549691	0.592862	0.548308	0.588295	0.584963	0.54965
CV3,1,F1	0.667231	0.73782	0.667407	0.667461	0.691802	0.677347	0.666987	0.668393	0.685081	0.669618	0.669944	0.68913	0.761035	0.689087	0.689124	0.735639	0.707134	0.689296	0.690162	0.702272	0.688818	0.693944	0.681738	0.738366	0.681623	0.682235	0.706153	0.682965	0.683564	0.682703	0.683429	0.682008	0.689648
CV3,1,N10	9.779e-05	0.0392284	0	0.00464728	0.00199919	1.69354e-05	0	0.00437084	0.00408238		0.0102892	9.779e-05	0.0242724	0	0.0034807	0.00155722	1.69354e-05	0	0.00429147	0.00348335		0.0148701	9.779e-05	0.034224	0	0.00349872	0.000713565	1.69354e-05	0	0.00461266	0.00348335		0.0109647
CV3,1,N20	0.000144066	0.0546982	0	0.00716276	0.00274644	2.62415e-05	0	0.0066361	0.00581519		0.0121172	0.000144066	0.0355513	0	0.00537375	0.00218134	2.62415e-05	0	0.00584871	0.00785637		0.0196796	0.000144066	0.0508964	0	0.00541083	0.00133778	2.62415e-05	0	0.00602461	0.00785637		0.0134355
CV3,1,N50	0.000236038	0.0658272	0	0.0130967	0.00456499	4.80742e-05	0	0.0112739	0.0123028		0.0149295	0.00046102	0.0484814	0	0.00984468	0.00345826	4.80742e-05	0	0.00841124	0.0123016		0.0238457	0.00046102	0.0680035	0	0.00991262	0.00323279	4.80742e-05	0	0.00863839	0.0123016		0.0192257
CV3,1,R10	0.000200391	0.0834691	0	0.00346401	0.00161571	0	0	0.00243675	0.00327552		0.012627	0.000200391	0.0494885	0	0.00428708	0.00141642	0	0	0.00258959	0.00224693		0.0301607	0.000200391	0.0730498	0	0.00381081	0.000797941	0	0	0.00280153	0.00224693		0.0250122
CV3,1,R20	0.000300391	0.131068	0	0.00811083	0.00205855	0	0	0.00741195	0.00821216		0.0169445	0.000300391	0.082314	0	0.0065477	0.00316222	0	0	0.00533431	0.0133106		0.0439799	0.000300391	0.120214	0	0.00902452	0.00164098	0	0	0.00507375	0.0133106		0.02923
CV3,1,R50	0.000517448	0.170053	0	0.0192986	0.00425447	0	0	0.020453	0.0279532		0.0220318	0.000587388	0.127357	0	0.015175	0.00515076	0	0	0.0106667	0.0258689		0.0523701	0.000587388	0.181587	0	0.0182842	0.004989	0	0	0.00921798	0.0258689		0.044023
CV3,1,P10	0.00022	0.0838826	0	0.00373085	0.00170225	0	0	0.00265063	0.00338291		0.0127288	0.00022	0.0497243	0	0.00443886	0.00152687	0	0	0.00284974	0.00235254		0.0303963	0.00022	0.0733112	0	0.00408368	0.000912382	0	0	0.00304611	0.00235254		0.0251626
CV3,1,P20	0.00031	0.131195	0	0.00827511	0.00212732	0	0	0.00753875	0.00824594		0.0170109	0.00031	0.0823829	0	0.00663435	0.00322495	0	0	0.00548447	0.0133543		0.0440964	0.00031	0.120314	0	0.00923917	0.00174367	0	0	0.0051957	0.0133543		0.0293384
CV3,1,P50	0.000524667	0.170095	0	0.0194131	0.00428736	0	0	0.0205111	0.0279732		0.0220867	0.000613162	0.127387	0	0.0152382	0.00519297	0	0	0.0107368	0.0258973		0.052461	0.000613162	0.181628	0	0.0184075	0.00504168	0	0	0.00928351	0.0258973		0.0441282
CV3,1,M10	6.22222e-05	0.0187976	0	0.00363943	0.00124667	0	0	0.00132062	0.00280132		0.00766518	6.22222e-05	0.0118502	0	0.00340018	0.00120911	0	0	0.00208501	0.00256376		0.00816521	6.22222e-05	0.0163416	0	0.00254192	0.000373943	0	0	0.00316191	0.00256376		0.00449539
CV3,1,M20	7.27485e-05	0.0230457	0	0.00422507	0.00144709	0	0	0.00186917	0.00326994		0.00819883	7.27485e-05	0.0150459	0	0.00379854	0.00137329	0	0	0.00259938	0.00355348		0.00933023	7.27485e-05	0.0209943	0	0.00320852	0.000571196	0	0	0.00359213	0.00355348		0.00519539
CV3,1,M50	7.92078e-05	0.0248137	0	0.00499646	0.00154933	0	0	0.00249196	0.00402538		0.00858399	0.000125921	0.0171395	0	0.00445358	0.00155146	0	0	0.00296664	0.00419386		0.0097567	0.000125921	0.0238256	0	0.00377429	0.000814197	0	0	0.0039161	0.00419386		0.00606203
CV1,5,AUROC	0.781444	0.939898	0.761913	0.857305	0.935179	0.907832	0.94024	0.624107	0.932148	0.944349	0.936862	0.77527	0.975434	0.372114	0.958427	0.97884	0.906308	0.98443	0.672752	0.915224	0.995275	0.960795	0.775247	0.95123	0.427272	0.892741	0.97711	0.892203	0.9775	0.667819	0.904638	0.974197	0.926304
CV1,5,AUPR	0.73725	0.891263	0.583694	0.808646	0.855024	0.842248	0.85821	0.261047	0.849034	0.873824	0.863811	0.736665	0.949858	0.242871	0.914729	0.961858	0.849701	0.965715	0.33389	0.827112	0.985531	0.931479	0.711999	0.901157	0.277819	0.832351	0.927531	0.817845	0.930976	0.304111	0.750321	0.92635	0.860062
CV1,5,F1	0.737731	0.854612	0.530949	0.792113	0.809438	0.811735	0.806476	0.335174	0.802135	0.826538	0.815374	0.740576	0.908468	0.286171	0.880742	0.927086	0.819808	0.920285	0.389463	0.790758	0.949174	0.890713	0.703609	0.852256	0.285714	0.807081	0.86311	0.791177	0.861515	0.375521	0.71848	0.860696	0.813036
CV1,5,N10	0.280718	0.308819	0.23901	0.232277	0.260967	0.293835	0.252863	0.0421217	0.227891		0.250609	0.279325	0.24519	0.207565	0.0923647	0.254652	0.284168	0.231549	0.0414775	0.243242		0.244408	0.279325	0.254537	0.228917	0.15564	0.262371	0.283931	0.2142	0.0263097	0.2437		0.236316
CV1,5,N20	0.291726	0.330579	0.256851	0.252453	0.279002	0.307796	0.272577	0.0455187	0.25073		0.265001	0.290725	0.265634	0.21605	0.102342	0.275088	0.29628	0.242158	0.0430564	0.264416		0.263573	0.290725	0.277652	0.239441	0.174684	0.278959	0.296017	0.234519	0.0280808	0.265761		0.256057
CV1,5,N50	0.310969	0.351277	0.274436	0.272796	0.291606	0.327507	0.289075	0.0498849	0.270618		0.283352	0.309852	0.283653	0.223402	0.114701	0.290642	0.313527	0.258293	0.0448021	0.283944		0.282447	0.309852	0.302285	0.248977	0.200978	0.292683	0.313298	0.255465	0.0301843	0.284945		0.273437
CV1,5,R10	0.264169	0.366145	0.325137	0.271415	0.33701	0.369014	0.334411	0.0489785	0.352612		0.31001	0.263023	0.293965	0.229315	0.15061	0.334371	0.365894	0.300246	0.0480246	0.357406		0.331299	0.263023	0.298974	0.275592	0.205507	0.327161	0.366076	0.274012	0.0282463	0.356529		0.334793
CV1,5,R20	0.291028	0.424057	0.36603	0.318002	0.378999	0.404737	0.384869	0.0558804	0.410848		0.344005	0.291385	0.345613	0.257028	0.17952	0.382855	0.396648	0.32125	0.0504557	0.412457		0.377367	0.291385	0.360712	0.30774	0.255066	0.364748	0.397345	0.330902	0.0308406	0.413326		0.384798
CV1,5,R50	0.340107	0.482606	0.407895	0.370961	0.40964	0.455448	0.428657	0.0646086	0.462401		0.389596	0.339175	0.399421	0.282781	0.218979	0.419596	0.441972	0.364472	0.0537468	0.462522		0.426908	0.339175	0.434085	0.338494	0.328862	0.400157	0.44295	0.392564	0.0361731	0.462122		0.428406
CV1,5,P10	0.26942	0.370811	0.32608	0.273134	0.337918	0.373682	0.335322	0.0493507	0.356278		0.311361	0.268236	0.295963	0.229773	0.150766	0.33529	0.368098	0.301039	0.0482028	0.361214		0.332305	0.268236	0.301504	0.276328	0.206119	0.328033	0.368301	0.274641	0.0284344	0.360344		0.33576
CV1,5,P20	0.292415	0.425708	0.366365	0.318447	0.379268	0.407143	0.385134	0.0560143	0.412569		0.344365	0.292809	0.346287	0.257156	0.179599	0.383138	0.397311	0.321435	0.0505559	0.414128		0.377734	0.292809	0.361479	0.307956	0.255254	0.365014	0.397988	0.33109	0.0309341	0.415037		0.385119
CV1,5,P50	0.340674	0.482724	0.407988	0.371052	0.409728	0.455585	0.428739	0.0646584	0.462569		0.38966	0.339746	0.399531	0.282832	0.219015	0.419682	0.442084	0.364558	0.0538002	0.4627		0.427005	0.339746	0.434186	0.33857	0.328895	0.400265	0.443059	0.392626	0.0362259	0.462293		0.428505
CV1,5,M10	0.28611	0.288625	0.204145	0.220144	0.228396	0.267543	0.221053	0.0348252	0.188112		0.226617	0.285046	0.225628	0.187728	0.0704302	0.223652	0.256915	0.200514	0.0345192	0.206349		0.210569	0.285046	0.240198	0.19781	0.136495	0.235068	0.2571	0.191495	0.0223835	0.206884		0.198128
CV1,5,M20	0.282075	0.287916	0.207812	0.220433	0.232618	0.268273	0.226135	0.0354565	0.185667		0.227834	0.280798	0.228433	0.189336	0.0724218	0.227923	0.2574	0.203464	0.0347818	0.203829		0.213945	0.280798	0.239993	0.199419	0.140247	0.239444	0.257254	0.195761	0.0226208	0.204818		0.201485
CV1,5,M50	0.276884	0.282835	0.206537	0.215684	0.230837	0.262402	0.224207	0.0356951	0.181782		0.224651	0.275762	0.225618	0.189035	0.0737241	0.226184	0.251723	0.200709	0.0349531	0.199471		0.213245	0.275762	0.235612	0.199014	0.141003	0.237141	0.251298	0.19464	0.0228703	0.200711		0.200228
CV2,5,AUROC	0.302925	0.86508	0.575369	0.800526	0.843782	0.804232	0.819123	0.608906	0.76648	0.759436	0.790689	0.27295	0.905614	0.449086	0.857353	0.937759	0.811718	0.92942	0.615751	0.757835	0.910109	0.775847	0.332644	0.87121	0.461755	0.839632	0.911891	0.78867	0.903497	0.605108	0.72678	0.887051	0.785279
CV2,5,AUPR	0.150954	0.70918	0.377189	0.613714	0.667539	0.628392	0.635729	0.262784	0.533889	0.539305	0.598893	0.141805	0.794605	0.206461	0.690326	0.840319	0.665077	0.816855	0.269661	0.547685	0.785351	0.585269	0.161043	0.714346	0.222483	0.648197	0.766677	0.616807	0.747124	0.240851	0.455894	0.738625	0.586724
CV2,5,F1	0.285714	0.65436	0.34864	0.586514	0.616854	0.589547	0.578315	0.334884	0.49424	0.485606	0.555113	0.293103	0.725515	0.293501	0.652589	0.788132	0.635898	0.731653	0.344389	0.5087	0.708493	0.548049	0.29171	0.653802	0.291832	0.603424	0.69661	0.587334	0.658953	0.331199	0.444307	0.658464	0.543009
CV2,5,N10	0.00523489	0.118229	0.116034	0.082905	0.124209	0.104089	0.117116	0.0236567	0.104293		0.122518	0.00523489	0.0917792	0.100655	0.00328608	0.119314	0.104059	0.110334	0.0205315	0.10078		0.123463	0.00523489	0.088837	0.111269	0.0103017	0.120776	0.103825	0.0880871	0.021814	0.10078		0.120377
CV2,5,N20	0.00619496	0.140781	0.12069	0.0944589	0.127285	0.107567	0.12154	0.0251888	0.118212		0.127526	0.00619496	0.105519	0.104431	0.00508654	0.124682	0.107564	0.112673	0.0224456	0.115449		0.128177	0.00619496	0.103791	0.117088	0.0159277	0.124733	0.107298	0.0966974	0.0259277	0.115449		0.126743
CV2,5,N50	0.00783057	0.158021	0.127256	0.101799	0.130666	0.11509	0.128908	0.0275753	0.13532		0.131091	0.00783057	0.119617	0.109667	0.00931682	0.131141	0.115288	0.120478	0.0293853	0.126008		0.13256	0.00783057	0.126472	0.121332	0.0291788	0.131369	0.115113	0.107234	0.0317221	0.126008		0.13237
CV2,5,R10	0.00413212	0.142658	0.134386	0.118603	0.138664	0.120812	0.140454	0.0205031	0.149111		0.139732	0.00413212	0.117181	0.0956586	0.0021424	0.137733	0.120786	0.115047	0.0160344	0.132968		0.134954	0.00413212	0.102954	0.113388	0.0130522	0.135863	0.120645	0.105876	0.0165021	0.132968		0.141087
CV2,5,R20	0.00580347	0.205687	0.142926	0.145643	0.144259	0.127431	0.150194	0.0217681	0.179849		0.150347	0.00580347	0.150817	0.105636	0.00453247	0.148248	0.127448	0.11941	0.0175428	0.172127		0.143765	0.00580347	0.144217	0.127173	0.0252871	0.143548	0.127223	0.128523	0.0240025	0.172127		0.153458
CV2,5,R50	0.00892185	0.256639	0.153825	0.156613	0.149413	0.142008	0.164235	0.0245604	0.234549		0.156866	0.00892185	0.191985	0.12066	0.0112106	0.160247	0.142624	0.134505	0.0354124	0.196331		0.152864	0.00892185	0.222848	0.137067	0.0637357	0.153545	0.142447	0.15325	0.0385115	0.196331		0.162202
CV2,5,P10	0.00464227	0.145831	0.137196	0.120911	0.141342	0.123564	0.143198	0.0211576	0.152089		0.14235	0.00464227	0.119506	0.0972206	0.00242648	0.140537	0.123516	0.118226	0.0165828	0.136098		0.13747	0.00464227	0.105459	0.115423	0.0135575	0.138601	0.123358	0.108752	0.0170994	0.136098		0.143698
CV2,5,P20	0.00604474	0.207052	0.144251	0.146637	0.145212	0.12848	0.151251	0.0220567	0.181203		0.15138	0.00604474	0.151669	0.106068	0.00468972	0.149485	0.128492	0.120373	0.0178004	0.173555		0.144705	0.00604474	0.144971	0.127834	0.0255425	0.144524	0.12823	0.129464	0.0242726	0.173555		0.154638
CV2,5,P50	0.00906882	0.256946	0.154125	0.15689	0.149595	0.14227	0.164483	0.0246849	0.235036		0.157088	0.00906882	0.192189	0.120769	0.0112755	0.16053	0.142892	0.134758	0.0355197	0.196873		0.153025	0.00906882	0.22301	0.137225	0.063831	0.153774	0.142706	0.153453	0.0386278	0.196873		0.16247
CV2,5,M10	0.00488216	0.102361	0.10284	0.0652877	0.105333	0.0936055	0.102237	0.0197405	0.0811278		0.102183	0.00488216	0.0745235	0.0956837	0.00236377	0.105534	0.0936062	0.102033	0.0211714	0.081174		0.102906	0.00488216	0.0777575	0.10037	0.00923185	0.10536	0.0936752	0.0788115	0.0210903	0.081174		0.102579
CV2,5,M20	0.00498089	0.106245	0.102053	0.0657667	0.105124	0.0943046	0.102303	0.0200453	0.0823906		0.101484	0.00498089	0.075923	0.0958269	0.00289429	0.104923	0.0942067	0.102845	0.0215279	0.0814592		0.102572	0.00498089	0.0800955	0.0996966	0.0107605	0.10557	0.0945045	0.0794288	0.0220235	0.0814592		0.101674
CV2,5,M50	0.00502046	0.106062	0.100202	0.0647696	0.104397	0.0907987	0.0998171	0.0202092	0.0807154		0.100419	0.00502046	0.0753285	0.0936418	0.00341369	0.103161	0.0906469	0.0987696	0.0221692	0.0791544		0.101316	0.00502046	0.0802323	0.097479	0.0118131	0.103588	0.0906696	0.0775508	0.0222421	0.0791544		0.0995231
CV3,5,AUROC	0.377596	0.810469	0.496269	0.492156	0.695082	0.653548	0.530216	0.547295	0.694063	0.654165	0.538194	0.368355	0.826012	0.449954	0.454695	0.730568	0.692139	0.538536	0.553928	0.679829	0.605588	0.58412	0.450651	0.779708	0.445739	0.474339	0.668909	0.572742	0.506961	0.53862	0.624239	0.584629	0.571401
CV3,5,AUPR	0.12563	0.547623	0.174841	0.171476	0.327653	0.250521	0.192172	0.187354	0.367003	0.287616	0.184398	0.133741	0.635809	0.17382	0.164842	0.4559	0.338681	0.214124	0.220674	0.408078	0.266388	0.229882	0.152664	0.505962	0.163633	0.163139	0.330145	0.227802	0.207943	0.205777	0.297415	0.253866	0.221089
CV3,5,F1	0.286266	0.549022	0.28924	0.287922	0.382404	0.362154	0.302539	0.308826	0.402882	0.351752	0.302487	0.305871	0.592821	0.304759	0.305286	0.453868	0.416615	0.313023	0.333271	0.403069	0.341552	0.342677	0.299022	0.505937	0.298633	0.301673	0.391	0.33217	0.304113	0.325976	0.351755	0.327212	0.334407
CV3,5,N10	9.779e-05	0.0342982	0	0.000280987	0.0082034	1.69354e-05	0	0.0015202	0.00408238		0.00441888	9.779e-05	0.0331895	0	0.00152425	0.0150758	1.69354e-05	0	0.00308138	0.00480373		0.00587468	9.779e-05	0.0419467	0	8.34981e-05	0.00107779	1.69354e-05	0	0.00351034	0.00480373		0.0112437
CV3,5,N20	0.000144066	0.0509064	0	0.00043539	0.0113703	2.62415e-05	0	0.00315665	0.00581519		0.00670732	0.000144066	0.0537093	0	0.00236184	0.0156663	2.62415e-05	0	0.00440217	0.00558864		0.0100555	0.000144066	0.0585042	0	0.000129381	0.00160568	2.62415e-05	0	0.00456383	0.00558864		0.0139055
CV3,5,N50	0.000236038	0.070197	0	0.000797633	0.0146196	4.80742e-05	0	0.00436761	0.0123028		0.0093555	0.00046102	0.0679253	0	0.00432687	0.0173927	4.80742e-05	0	0.00519983	0.00700773		0.0131349	0.00046102	0.073492	0	0.000237025	0.00337515	4.80742e-05	0	0.00550513	0.00700773		0.0168404
CV3,5,R10	0.000200391	0.0722771	0	0.000911854	0.0108569	0	0	0.00119007	0.00327552		0.00836596	0.000200391	0.0715621	0	0.00118514	0.0176026	0	0	0.00224917	0.00362629		0.00530427	0.000200391	0.0887932	0	0.000112144	0.00263815	0	0	0.00192996	0.00362629		0.026998
CV3,5,R20	0.000300391	0.120004	0	0.00123399	0.0180363	0	0	0.00318822	0.00821216		0.0141515	0.000300391	0.135524	0	0.00216602	0.0182721	0	0	0.00299797	0.00434444		0.0163646	0.000300391	0.137874	0	0.000112144	0.00295345	0	0	0.00360898	0.00434444		0.0343841
CV3,5,R50	0.000517448	0.186238	0	0.00232586	0.0268995	0	0	0.00497443	0.0279532		0.0186234	0.000587388	0.183049	0	0.00640931	0.0205649	0	0	0.00485499	0.00630277		0.0231941	0.000587388	0.189842	0	0.000125477	0.00496491	0	0	0.00574916	0.00630277		0.0415114
CV3,5,P10	0.00022	0.0725773	0	0.000911854	0.0109762	0	0	0.00130102	0.00338291		0.00842305	0.00022	0.0717999	0	0.00130393	0.0176793	0	0	0.00244346	0.00373403		0.00537659	0.00022	0.0890871	0	0.000117161	0.00267972	0	0	0.00209414	0.00373403		0.0270703
CV3,5,P20	0.00031	0.120106	0	0.00125792	0.0180765	0	0	0.00325522	0.00824594		0.0142185	0.00031	0.135636	0	0.00223223	0.0182958	0	0	0.00309356	0.00437797		0.0163964	0.00031	0.137995	0	0.000112144	0.00299301	0	0	0.00368156	0.00437797		0.0344218
CV3,5,P50	0.000524667	0.186294	0	0.00233156	0.0269326	0	0	0.00501849	0.0279732		0.0186748	0.000613162	0.183084	0	0.00642673	0.0205848	0	0	0.00489544	0.00634211		0.0232155	0.000613162	0.18988	0	0.000125477	0.00499938	0	0	0.00578392	0.00634211		0.0415571
CV3,5,M10	6.22222e-05	0.0167587	0	0.000368119	0.0049257	0	0	0.000904685	0.00280132		0.00234969	6.22222e-05	0.0154613	0	0.00128252	0.0120531	0	0	0.00337754	0.00317606		0.00448025	6.22222e-05	0.0200876	0	6.17897e-05	0.00214682	0	0	0.00183735	0.00317606		0.00431037
CV3,5,M20	7.27485e-05	0.0214501	0	0.000427706	0.00577775	0	0	0.00140723	0.00326994		0.00307585	7.27485e-05	0.0212094	0	0.00155285	0.0122129	0	0	0.00354631	0.00342886		0.0057235	7.27485e-05	0.0246871	0	6.17897e-05	0.00212974	0	0	0.00216015	0.00342886		0.00513158
CV3,5,M50	7.92078e-05	0.0245825	0	0.000483437	0.00627564	0	0	0.00157218	0.00402538		0.0035177	0.000125921	0.0234987	0	0.00189258	0.0124933	0	0	0.00365077	0.00361711		0.0059237	0.000125921	0.0271923	0	6.9482e-05	0.00237051	0	0	0.00228049	0.00361711		0.0055753
CV1,20,AUROC	0.781225	0.933366	0.74197	0.857193	0.919714	0.90992	0.92779	0.33501	0.931979	0.948546	0.939032	0.778294	0.965678	0.35168	0.945808	0.952796	0.905892	0.964289	0.482634	0.923157	0.989475	0.948573	0.777507	0.936518	0.477158	0.8712	0.941486	0.900185	0.948969	0.426371	0.919146	0.96127	0.924929
CV1,20,AUPR	0.650761	0.820077	0.354154	0.71708	0.67648	0.758729	0.699107	0.0366024	0.702135	0.755908	0.751641	0.656448	0.897481	0.0867607	0.843286	0.8395	0.767135	0.860269	0.0805623	0.699671	0.937916	0.86314	0.618612	0.811194	0.154255	0.726941	0.684586	0.729616	0.744953	0.0725647	0.600633	0.791102	0.721899
CV1,20,F1	0.703118	0.808612	0.378653	0.735498	0.684936	0.770115	0.692391	0.0976451	0.703716	0.748036	0.752144	0.706602	0.869797	0.108755	0.835975	0.789878	0.766739	0.805026	0.163072	0.702355	0.880891	0.834201	0.656488	0.7917	0.18939	0.739765	0.673792	0.727364	0.714002	0.155908	0.619797	0.747151	0.723119
CV1,20,N10	0.280718	0.336294	0.240442	0.260812	0.268057	0.319141	0.250227	0.0141453	0.227891		0.277021	0.279325	0.277811	0.0953308	0.170128	0.256931	0.289385	0.218577	0.00193378	0.2437		0.256302	0.279325	0.294671	0.200976	0.229259	0.271867	0.296915	0.22465	0.00352841	0.239657		0.271909
CV1,20,N20	0.291726	0.358013	0.258179	0.275729	0.28314	0.339636	0.268016	0.0155459	0.25073		0.292627	0.290725	0.300859	0.104468	0.18852	0.272929	0.302417	0.233883	0.00270542	0.265761		0.274118	0.290725	0.313779	0.204635	0.250122	0.281422	0.311714	0.2417	0.00450125	0.262448		0.286493
CV1,20,N50	0.310969	0.379474	0.275179	0.298082	0.293557	0.354446	0.286522	0.0173557	0.270618		0.310863	0.309852	0.324342	0.13491	0.208718	0.280247	0.321837	0.254655	0.00379104	0.284945		0.291526	0.309852	0.334831	0.213992	0.274685	0.28632	0.331014	0.262136	0.00537493	0.282023		0.303989
CV1,20,R10	0.264169	0.403903	0.324361	0.285042	0.33583	0.3839	0.333765	0.0170075	0.352612		0.332494	0.263023	0.318276	0.0749855	0.208119	0.332306	0.366196	0.284111	0.000782245	0.356529		0.338747	0.263023	0.330203	0.206611	0.267977	0.334056	0.369851	0.309593	0.00199118	0.352046		0.345043
CV1,20,R20	0.291028	0.46342	0.362899	0.320212	0.370415	0.434766	0.377832	0.0193826	0.410848		0.372462	0.291385	0.379608	0.105464	0.252028	0.369157	0.401582	0.321744	0.00138054	0.413326		0.385229	0.291385	0.379131	0.215805	0.318252	0.354885	0.408152	0.354314	0.003184	0.411278		0.383998
CV1,20,R50	0.340107	0.527664	0.401773	0.379549	0.394173	0.472279	0.425536	0.022456	0.462401		0.419805	0.339175	0.447208	0.221657	0.305694	0.385746	0.449242	0.38157	0.0029619	0.462122		0.429703	0.339175	0.437065	0.249611	0.38372	0.36525	0.457218	0.41385	0.00443919	0.461597		0.426757
CV1,20,P10	0.26942	0.411347	0.3253	0.287857	0.336746	0.390882	0.334676	0.0171674	0.356278		0.333733	0.268236	0.321301	0.0752158	0.208653	0.333243	0.368934	0.284872	0.000883491	0.360344		0.33949	0.268236	0.333946	0.207165	0.269707	0.334933	0.374408	0.31036	0.00215888	0.355939		0.345887
CV1,20,P20	0.292415	0.466095	0.363231	0.320958	0.370721	0.437767	0.378098	0.0194629	0.412569		0.372814	0.292809	0.380761	0.105545	0.25218	0.369438	0.402474	0.321949	0.00147282	0.415037		0.385477	0.292809	0.380497	0.215989	0.318812	0.355134	0.410389	0.354567	0.00328217	0.4131		0.384264
CV1,20,P50	0.340674	0.527803	0.401856	0.379697	0.394257	0.472442	0.425621	0.0224958	0.462569		0.419901	0.339746	0.447341	0.221701	0.305735	0.385829	0.449371	0.381646	0.00301338	0.462293		0.429798	0.339746	0.43719	0.249683	0.383832	0.365329	0.457363	0.413929	0.00448805	0.461794		0.426852
CV1,20,M10	0.28611	0.314279	0.203843	0.255775	0.235112	0.295242	0.218707	0.0107261	0.188112		0.255912	0.285046	0.265157	0.105425	0.156955	0.219735	0.264158	0.19326	0.00168206	0.206884		0.224399	0.285046	0.282913	0.184022	0.219261	0.235694	0.272945	0.193673	0.00296606	0.203453		0.244199
CV1,20,M20	0.282075	0.312728	0.207087	0.252999	0.238248	0.296128	0.223567	0.0110635	0.185667		0.257617	0.280798	0.265529	0.10557	0.159573	0.222803	0.264158	0.19528	0.00186932	0.204818		0.227643	0.280798	0.281949	0.184616	0.21964	0.237966	0.272346	0.196856	0.00323239	0.201448		0.24627
CV1,20,M50	0.276884	0.306751	0.20607	0.246708	0.237561	0.290396	0.221491	0.0112142	0.181782		0.253876	0.275762	0.259976	0.100813	0.158947	0.221798	0.257185	0.19214	0.00199633	0.200711		0.225409	0.275762	0.27582	0.183975	0.215528	0.237719	0.265595	0.195682	0.00332003	0.19819		0.242917
CV2,20,AUROC	0.303049	0.867748	0.56592	0.796759	0.830614	0.805603	0.815066	0.449149	0.765067	0.808562	0.794529	0.28404	0.891775	0.450807	0.846447	0.90968	0.814163	0.900188	0.473872	0.758675	0.891891	0.834016	0.316512	0.853272	0.482264	0.809703	0.867597	0.800384	0.859768	0.487845	0.750185	0.842415	0.765658
CV2,20,AUPR	0.0522589	0.533043	0.200555	0.389079	0.442258	0.416368	0.422921	0.0458385	0.313867	0.389536	0.412183	0.0489812	0.612029	0.069936	0.443636	0.579146	0.468091	0.569804	0.0553744	0.334062	0.561396	0.435306	0.0525502	0.517389	0.10155	0.405668	0.487268	0.419715	0.467834	0.058321	0.279299	0.450182	0.388065
CV2,20,F1	0.0909091	0.54719	0.234829	0.412132	0.455798	0.428342	0.434116	0.100042	0.355009	0.401676	0.439702	0.0936434	0.588674	0.0955472	0.462478	0.573477	0.478756	0.540579	0.12183	0.37117	0.53335	0.44908	0.0931168	0.533107	0.111386	0.413353	0.498876	0.42644	0.459289	0.115373	0.327933	0.448778	0.42203
CV2,20,N10	0.00523489	0.134601	0.116765	0.111833	0.126895	0.10423	0.113278	0.0049262	0.104293		0.145859	0.00523489	0.0954093	0.0493032	0.0102764	0.123821	0.103805	0.104047	0.00337564	0.105871		0.130549	0.00523489	0.107345	0.0965842	0.0478419	0.124038	0.103943	0.096218	0.0141745	0.105871		0.124657
CV2,20,N20	0.00619496	0.15126	0.121877	0.119194	0.129678	0.108346	0.118058	0.0056124	0.118212		0.15367	0.00619496	0.105157	0.0629144	0.0159157	0.127459	0.107832	0.108267	0.00400192	0.120315		0.136422	0.00619496	0.122742	0.0978659	0.0631606	0.1263	0.10763	0.103135	0.0155329	0.120315		0.132859
CV2,20,N50	0.00783057	0.164296	0.127926	0.124987	0.131046	0.115355	0.125469	0.00676331	0.13532		0.161808	0.00783057	0.117664	0.0709111	0.0291252	0.130675	0.115257	0.119538	0.0053517	0.129151		0.1426	0.00783057	0.137433	0.104354	0.0750732	0.127644	0.115145	0.110798	0.0172788	0.129151		0.139843
CV2,20,R10	0.00413212	0.179079	0.133829	0.130479	0.139208	0.120921	0.138316	0.00217553	0.149111		0.201813	0.00413212	0.102887	0.0311378	0.0128898	0.134415	0.119993	0.111273	0.000634664	0.149493		0.13667	0.00413212	0.137783	0.079076	0.06755	0.137181	0.120642	0.12604	0.00947794	0.149493		0.147523
CV2,20,R20	0.00580347	0.223862	0.142387	0.145121	0.144158	0.128842	0.148369	0.00299524	0.179849		0.220094	0.00580347	0.129857	0.0642998	0.0271897	0.141682	0.12824	0.120613	0.00107371	0.183761		0.150036	0.00580347	0.182105	0.0814795	0.106716	0.141564	0.127651	0.143208	0.0120185	0.183761		0.167346
CV2,20,R50	0.00892185	0.258037	0.151239	0.153937	0.145771	0.141582	0.162031	0.00415319	0.234549		0.236626	0.00892185	0.16324	0.0850208	0.0669889	0.145833	0.141859	0.149231	0.00255955	0.200541		0.162589	0.00892185	0.225936	0.0992227	0.144571	0.142683	0.142014	0.15837	0.0152193	0.200541		0.181935
CV2,20,P10	0.00464227	0.182039	0.136611	0.133114	0.141805	0.123706	0.141061	0.00257543	0.152089		0.204256	0.00464227	0.105016	0.0317755	0.0132704	0.136872	0.122752	0.114402	0.000899583	0.152633		0.139304	0.00464227	0.140013	0.0806463	0.0686466	0.139792	0.123347	0.128938	0.00977206	0.152633		0.15008
CV2,20,P20	0.00604474	0.225266	0.143649	0.146294	0.144903	0.129971	0.149515	0.00319623	0.181203		0.221063	0.00604474	0.130589	0.064618	0.0274046	0.142594	0.129313	0.121621	0.00123636	0.185169		0.150976	0.00604474	0.182882	0.0819218	0.107179	0.142347	0.128675	0.144235	0.012203	0.185169		0.168368
CV2,20,P50	0.00906882	0.258391	0.151508	0.154196	0.145936	0.14185	0.162305	0.0042424	0.235036		0.236901	0.00906882	0.163437	0.0851192	0.0670706	0.146015	0.142132	0.149514	0.00263524	0.201053		0.1628	0.00906882	0.226143	0.0993597	0.144674	0.142815	0.142263	0.158613	0.0153083	0.201053		0.182147
CV2,20,M10	0.00488216	0.112164	0.102529	0.0977375	0.103917	0.0935078	0.0982415	0.00444881	0.0811278		0.113853	0.00488216	0.0862041	0.070558	0.00949403	0.105468	0.0934183	0.0973701	0.00317768	0.082118		0.111773	0.00488216	0.0919105	0.0930643	0.0385696	0.103266	0.0936417	0.0810359	0.0132413	0.082118		0.104163
CV2,20,M20	0.00498089	0.114759	0.101793	0.0972905	0.103995	0.0937213	0.0984701	0.00452306	0.0823906		0.114208	0.00498089	0.0873534	0.0583267	0.0110939	0.105364	0.0938656	0.0967169	0.00335774	0.0825834		0.111494	0.00498089	0.0942118	0.0929115	0.0397879	0.103356	0.0944136	0.0820389	0.0135795	0.0825834		0.10474
CV2,20,M50	0.00502046	0.113887	0.0998915	0.0959478	0.103995	0.0909317	0.0959736	0.00448382	0.0807154		0.1133	0.00502046	0.0848936	0.0502851	0.0120812	0.105062	0.0907465	0.0927093	0.00350181	0.0804332		0.109966	0.00502046	0.093379	0.0911729	0.039223	0.103299	0.0906068	0.0803779	0.0137123	0.0804332		0.103304
CV3,20,AUROC	0.37569	0.802308	0.486571	0.519779	0.644577	0.655249	0.455654	0.514546	0.691298	0.675429	0.572985	0.383078	0.822775	0.467638	0.484051	0.687164	0.678145	0.482718	0.518858	0.693301	0.613938	0.577155	0.411154	0.789524	0.440343	0.477196	0.636759	0.618745	0.433443	0.519996	0.668776	0.636819	0.603493
CV3,20,AUPR	0.0347635	0.315769	0.0479324	0.0523357	0.123416	0.0784484	0.0533854	0.053955	0.15421	0.112912	0.0983384	0.037823	0.400553	0.049355	0.0502455	0.147292	0.112417	0.0545737	0.0600055	0.187485	0.0804618	0.0874382	0.0395252	0.278659	0.045891	0.0482983	0.125167	0.0772156	0.0496116	0.0577299	0.135977	0.0907418	0.0879206
CV3,20,F1	0.0911836	0.37437	0.0978466	0.0989067	0.196775	0.156935	0.102377	0.117349	0.223236	0.179707	0.140712	0.0984644	0.432488	0.100484	0.100561	0.19718	0.202379	0.108952	0.12867	0.247888	0.139589	0.144222	0.0967112	0.350023	0.0967007	0.0978961	0.186391	0.149136	0.0985324	0.126256	0.205523	0.154151	0.144702
CV3,20,N10	9.779e-05	0.0726389	0	0	0.0167313	1.69354e-05	0	0.00146283	0.00408238		0.00893608	9.779e-05	0.0500614	0	0	0.0139373	1.69354e-05	0	0.00107191	0.003516		0.0149163	9.779e-05	0.058757	0	0	0.0356666	1.69354e-05	0	0.00132725	0.003516		0.00525202
CV3,20,N20	0.000144066	0.0821739	0	0	0.0198026	2.62415e-05	0	0.00389975	0.00581519		0.0147026	0.000144066	0.0631992	0	0	0.0148512	2.62415e-05	0	0.00269408	0.00476099		0.0165887	0.000144066	0.0689897	0	0	0.0374255	2.62415e-05	0	0.00322002	0.00476099		0.00827025
CV3,20,N50	0.000236038	0.0910976	0	0	0.0241575	4.80742e-05	0	0.00657471	0.0123028		0.0202948	0.00046102	0.075282	0	0	0.0177609	4.80742e-05	0	0.00314609	0.00669298		0.019962	0.00046102	0.078769	0	0	0.0396317	4.80742e-05	0	0.00400885	0.00669298		0.0122225
CV3,20,R10	0.000200391	0.144784	0	0	0.00566085	0	0	0.00114111	0.00327552		0.0195201	0.000200391	0.111371	0	0	0.00679936	0	0	0.000832095	0.0029457		0.0186666	0.000200391	0.127749	0	0	0.0400041	0	0	0.000821963	0.0029457		0.00997285
CV3,20,R20	0.000300391	0.168684	0	0	0.00987482	0	0	0.0053903	0.00821216		0.0361143	0.000300391	0.150652	0	0	0.00725601	0	0	0.00308111	0.00440999		0.022455	0.000300391	0.156473	0	0	0.0420918	0	0	0.00378309	0.00440999		0.0181015
CV3,20,R50	0.000517448	0.19595	0	0	0.0183863	0	0	0.0144527	0.0279532		0.0528908	0.000587388	0.189271	0	0	0.0114944	0	0	0.00449622	0.00764404		0.032161	0.000587388	0.185101	0	0	0.0458562	0	0	0.00620265	0.00764404		0.0303539
CV3,20,P10	0.00022	0.145136	0	0	0.00588765	0	0	0.001192	0.00338291		0.0196376	0.00022	0.111721	0	0	0.00696424	0	0	0.000893116	0.00307659		0.0187485	0.00022	0.128077	0	0	0.0404856	0	0	0.000872853	0.00307659		0.010117
CV3,20,P20	0.00031	0.168797	0	0	0.0100026	0	0	0.00541936	0.00824594		0.0361653	0.00031	0.150779	0	0	0.00737086	0	0	0.00310258	0.00445498		0.0224971	0.00031	0.156585	0	0	0.0423302	0	0	0.00380456	0.00445498		0.0181618
CV3,20,P50	0.000524667	0.195993	0	0	0.0184322	0	0	0.0144658	0.0279732		0.0529141	0.000613162	0.189298	0	0	0.0115486	0	0	0.00451217	0.00767246		0.0321767	0.000613162	0.185132	0	0	0.0459081	0	0	0.00622428	0.00767246		0.0303995
CV3,20,M10	6.22222e-05	0.03927	0	0	0.0151622	0	0	0.00117687	0.00280132		0.00410864	6.22222e-05	0.0232159	0	0	0.0118968	0	0	0.000749168	0.00223271		0.0116778	6.22222e-05	0.0284954	0	0	0.0295281	0	0	0.000989434	0.00223271		0.00264676
CV3,20,M20	7.27485e-05	0.041898	0	0	0.015961	0	0	0.00193302	0.00326994		0.00574382	7.27485e-05	0.026911	0	0	0.0119162	0	0	0.00127467	0.00258616		0.0121251	7.27485e-05	0.0314691	0	0	0.0298496	0	0	0.00159545	0.00258616		0.00348897
CV3,20,M50	7.92078e-05	0.0432369	0	0	0.0166384	0	0	0.00231128	0.00402538		0.00662959	0.000125921	0.0287956	0	0	0.0120907	0	0	0.00133266	0.00286221		0.012588	0.000125921	0.0329404	0	0	0.0298866	0	0	0.00170533	0.00286221		0.00402728
CV1,50,AUROC	0.781226	0.933039	0.749071	0.837356	0.898601	0.911372	0.557196	0.288672	0.932083		0.930668	0.779413	0.956559	0.363992	0.935643	0.929818	0.906225	0.609146	0.274478	0.92717		0.927566	0.778633	0.92791	0.515156	0.853906	0.901602	0.905291	0.595225	0.264788	0.920981		0.871273
CV1,50,AUPR	0.600328	0.761504	0.2514	0.657046	0.514855	0.705032	0.104875	0.0126627	0.565716		0.65496	0.611829	0.85378	0.0154173	0.778184	0.698646	0.714916	0.124412	0.0124293	0.594671		0.790231	0.568716	0.748435	0.100555	0.650256	0.515198	0.67998	0.106831	0.0122348	0.472128		0.615143
CV1,50,F1	0.663594	0.757136	0.315573	0.689862	0.543248	0.713338	0.224061	0.0385078	0.604827		0.681822	0.672197	0.833858	0.0386228	0.790226	0.672627	0.7173	0.246183	0.0384782	0.629709		0.777718	0.621671	0.743212	0.145561	0.683206	0.546599	0.681121	0.215586	0.0384994	0.516595		0.652561
CV1,50,N10	0.280718	0.350966	0.240684	0.273902	0.260892	0.334734	0.0431842	0.00265801	0.227891		0.305964	0.279325	0.300183	0.0015065	0.212062	0.254286	0.306391	0.0500001	0.00146793	0.239657		0.272176	0.279325	0.31431	0.13606	0.253352	0.266425	0.32098	0.0447292	0.0015264	0.243242		0.289467
CV1,50,N20	0.291726	0.370094	0.25828	0.289176	0.274862	0.354293	0.0506211	0.00323894	0.25073		0.321659	0.290725	0.317247	0.00263234	0.228894	0.269142	0.323848	0.0609355	0.00177748	0.262448		0.287967	0.290725	0.329695	0.137112	0.269701	0.276956	0.340339	0.0637834	0.00187773	0.264416		0.300539
CV1,50,N50	0.310969	0.388917	0.275995	0.310819	0.287191	0.36827	0.0774815	0.0048791	0.270618		0.338203	0.309852	0.337128	0.0261551	0.250133	0.281718	0.3419	0.0839143	0.00298196	0.282023		0.304308	0.309852	0.348633	0.158645	0.293973	0.287258	0.355474	0.0812996	0.00293432	0.283944		0.317981
CV1,50,R10	0.264169	0.410493	0.324598	0.289071	0.335148	0.392542	0.056511	0.00175182	0.352612		0.364283	0.263023	0.334377	0.00128276	0.245668	0.321673	0.373704	0.0657535	0.000475968	0.352046		0.345323	0.263023	0.339069	0.121709	0.281532	0.320813	0.38542	0.0546243	0.000611367	0.357406		0.353809
CV1,50,R20	0.291028	0.46403	0.362722	0.326123	0.367379	0.443201	0.0730982	0.00252819	0.410848		0.404693	0.291385	0.377288	0.00238757	0.283817	0.354517	0.419167	0.0924805	0.00093212	0.411278		0.385542	0.291385	0.378839	0.124605	0.321249	0.342182	0.432615	0.1091	0.000999081	0.412457		0.384632
CV1,50,R50	0.340107	0.519254	0.403422	0.383365	0.394884	0.479548	0.160062	0.00459726	0.462401		0.44645	0.339175	0.434251	0.0800618	0.339905	0.38587	0.462631	0.16397	0.00233332	0.461597		0.425769	0.339175	0.434835	0.203211	0.386776	0.368302	0.471264	0.160772	0.00239489	0.462522		0.429897
CV1,50,P10	0.26942	0.418728	0.325515	0.292491	0.336037	0.400818	0.0568197	0.00192208	0.356278		0.366028	0.268236	0.339665	0.00136098	0.246838	0.322533	0.378887	0.0661524	0.000572008	0.355939		0.346309	0.268236	0.345499	0.1221	0.283763	0.321617	0.392055	0.0549155	0.000722517	0.361214		0.354793
CV1,50,P20	0.292415	0.467092	0.363029	0.326976	0.367637	0.446444	0.0732399	0.00260379	0.412569		0.4052	0.292809	0.379108	0.00249345	0.284131	0.354784	0.421656	0.0926692	0.000983076	0.4131		0.385833	0.292809	0.381305	0.124757	0.321911	0.342421	0.435606	0.109239	0.00106179	0.414128		0.384924
CV1,50,P50	0.340674	0.519499	0.403511	0.383574	0.394959	0.479731	0.160129	0.00464254	0.462569		0.446597	0.339746	0.434446	0.0801023	0.339961	0.385948	0.46279	0.164029	0.00237165	0.461794		0.425853	0.339746	0.435059	0.203278	0.386937	0.368377	0.471433	0.160813	0.00243922	0.4627		0.429992
CV1,50,M10	0.28611	0.330672	0.203779	0.272532	0.225788	0.313052	0.035433	0.00225319	0.188112		0.283522	0.285046	0.286021	0.00128545	0.20089	0.22151	0.282691	0.0396467	0.00122992	0.203453		0.24363	0.285046	0.305328	0.139838	0.248139	0.234244	0.298563	0.0383965	0.00133752	0.206349		0.264311
CV1,50,M20	0.282075	0.328851	0.207341	0.268714	0.228637	0.312541	0.0370319	0.00237284	0.185667		0.28393	0.280798	0.284766	0.00161756	0.202172	0.22427	0.283018	0.042737	0.00131303	0.201448		0.245334	0.280798	0.302508	0.139775	0.246101	0.23607	0.298636	0.0429754	0.00141079	0.203829		0.265423
CV1,50,M50	0.276884	0.322313	0.206003	0.261898	0.227905	0.305672	0.0393577	0.00253715	0.181782		0.279951	0.275762	0.27968	0.0055247	0.199543	0.223267	0.276969	0.0452328	0.00146596	0.19819		0.241843	0.275762	0.295066	0.132768	0.23952	0.235445	0.291666	0.0445492	0.00150986	0.199471		0.261456
CV2,50,AUROC	0.303041	0.864983	0.569586	0.802996	0.791571	0.806584	0.631866	0.37809	0.765035		0.714245	0.289523	0.88234	0.471873	0.832007	0.84369	0.814965	0.690381	0.367932	0.759662		0.819442	0.309659	0.853698	0.504143	0.806439	0.816265	0.804165	0.678532	0.365812	0.756406		0.706439
CV2,50,AUPR	0.0249411	0.399229	0.134945	0.273647	0.2952	0.29158	0.1405	0.015261	0.200603		0.28388	0.0238865	0.468446	0.0185315	0.298044	0.379749	0.341128	0.185329	0.0155723	0.227196		0.305998	0.0249169	0.394021	0.0607552	0.289189	0.298378	0.298275	0.154735	0.015443	0.177819		0.274191
CV2,50,F1	0.0527014	0.453243	0.189426	0.322608	0.349695	0.335851	0.214422	0.0385612	0.274734		0.376915	0.0496317	0.491226	0.0423531	0.342807	0.412706	0.378827	0.247611	0.039594	0.298637		0.35875	0.0525048	0.446443	0.0827374	0.327122	0.3603	0.341034	0.218861	0.0394798	0.254655		0.357015
CV2,50,N10	0.00523489	0.144515	0.116813	0.110172	0.125561	0.104692	0.0806015	0.00110701	0.104293		0.163608	0.00523489	0.109315	0.00106654	0.02954	0.119698	0.103531	0.0801394	0.00109902	0.100753		0.136122	0.00523489	0.11828	0.0745226	0.0544707	0.125432	0.104234	0.0791745	0.00106682	0.100753		0.139981
CV2,50,N20	0.00619496	0.157731	0.121998	0.118131	0.130202	0.109705	0.0844624	0.00183464	0.118212		0.169571	0.00619496	0.118789	0.00874732	0.0454854	0.125028	0.108562	0.0834316	0.00175858	0.116355		0.142942	0.00619496	0.131125	0.0783206	0.0648526	0.130153	0.108474	0.0842403	0.00199059	0.116355		0.147187
CV2,50,N50	0.00783057	0.168173	0.128009	0.124427	0.135192	0.115699	0.0912458	0.00310449	0.13532		0.174913	0.00783057	0.13014	0.0185832	0.0650697	0.134911	0.115355	0.0900825	0.00269121	0.131617		0.149645	0.00783057	0.140986	0.0864478	0.0757383	0.136703	0.115329	0.0905588	0.00302608	0.131617		0.153378
CV2,50,R10	0.00413212	0.197764	0.134035	0.122094	0.139361	0.121413	0.0671522	0.00049048	0.149111		0.209157	0.00413212	0.13644	0.000556869	0.0413653	0.137355	0.118704	0.0647058	0.000358983	0.141222		0.13575	0.00413212	0.146179	0.0524004	0.071136	0.146253	0.120571	0.067143	0.000420375	0.141222		0.16943
CV2,50,R20	0.00580347	0.228795	0.142675	0.138681	0.145905	0.130043	0.0725655	0.000961487	0.179849		0.221652	0.00580347	0.160565	0.0143335	0.0819717	0.146419	0.12968	0.069672	0.000784931	0.181469		0.150916	0.00580347	0.183958	0.0609066	0.0987411	0.154061	0.128725	0.0763083	0.0010997	0.181469		0.184867
CV2,50,R50	0.00892185	0.255691	0.151084	0.149395	0.152536	0.139606	0.0846358	0.00177857	0.234549		0.233644	0.00892185	0.193581	0.0307176	0.14442	0.168825	0.140425	0.0823401	0.00148432	0.229456		0.165554	0.00892185	0.212952	0.0802386	0.134657	0.162838	0.14135	0.0879759	0.00192289	0.229456		0.198484
CV2,50,P10	0.00464227	0.200251	0.136835	0.12503	0.141973	0.124168	0.0696118	0.000624253	0.152089		0.211549	0.00464227	0.138521	0.000716091	0.0422375	0.140078	0.121481	0.0672979	0.000505953	0.144374		0.138269	0.00464227	0.148242	0.0533223	0.0722648	0.148912	0.123291	0.0696566	0.000576248	0.144374		0.171898
CV2,50,P20	0.00604474	0.229996	0.143947	0.13993	0.14683	0.131397	0.0734341	0.00108812	0.181203		0.222618	0.00604474	0.161345	0.0145562	0.0824268	0.147499	0.130839	0.0704937	0.000895136	0.182899		0.151872	0.00604474	0.184564	0.061218	0.0991319	0.155123	0.129848	0.0772076	0.00121551	0.182899		0.185731
CV2,50,P50	0.00906882	0.255995	0.151354	0.149682	0.152761	0.139879	0.0848904	0.00184679	0.235036		0.233959	0.00906882	0.193786	0.0308274	0.144537	0.169077	0.1407	0.0825856	0.00153844	0.229985		0.165775	0.00906882	0.21309	0.080363	0.134739	0.163059	0.141599	0.0882202	0.00198196	0.229985		0.198678
CV2,50,M10	0.00488216	0.118735	0.10271	0.0987522	0.104547	0.0932669	0.0806547	0.000963772	0.0811278		0.131733	0.00488216	0.0911501	0.00109089	0.0248744	0.103897	0.0932513	0.0757542	0.000854618	0.079491		0.120884	0.00488216	0.101526	0.0918731	0.0451604	0.106685	0.0937279	0.0740702	0.000943897	0.079491		0.115979
CV2,50,M20	0.00498089	0.120025	0.101994	0.0981711	0.105011	0.0925142	0.0802023	0.00115591	0.0823906		0.131835	0.00498089	0.0913589	0.00296453	0.0267999	0.103666	0.0931546	0.0748028	0.00104795	0.0790253		0.120377	0.00498089	0.103438	0.0850611	0.0460376	0.10648	0.0935175	0.073386	0.00119714	0.0790253		0.116262
CV2,50,M50	0.00502046	0.118669	0.100118	0.0964782	0.104894	0.091148	0.0784285	0.00128304	0.0807154		0.131154	0.00502046	0.090162	0.00465939	0.0268425	0.102734	0.0907038	0.0723959	0.00112581	0.0776466		0.117173	0.00502046	0.102326	0.0706403	0.0458166	0.10549	0.090898	0.071911	0.0012234	0.0776466		0.113865
CV3,50,AUROC	0.374982	0.805553	0.510365	0.500278	0.522612	0.657297	0.504725	0.515822	0.694623		0.558708	0.380218	0.816223	0.522656	0.51347	0.569304	0.675597	0.526675	0.508607	0.687608		0.638311	0.393498	0.773739	0.488011	0.507721	0.546642	0.637396	0.493205	0.466793	0.67491		0.566804
CV3,50,AUPR	0.0142062	0.20273	0.0254148	0.0214841	0.0235762	0.0334012	0.0224027	0.0218521	0.0757652		0.0586919	0.0153218	0.254586	0.0243054	0.0236435	0.0536125	0.0473915	0.0267696	0.0230931	0.0929329		0.0771342	0.01561	0.177457	0.0208594	0.0217101	0.0274732	0.0337149	0.0267783	0.0203788	0.0708782		0.0580983
CV3,50,F1	0.0385698	0.27925	0.0572663	0.0468837	0.0454365	0.0779428	0.052079	0.0520867	0.143669		0.107901	0.0414188	0.326105	0.0573802	0.0525232	0.0959766	0.111833	0.0706489	0.05101	0.160167		0.127106	0.0409227	0.26394	0.0474103	0.0467449	0.0570927	0.0775096	0.0657545	0.0458893	0.135862		0.100281
CV3,50,N10	9.779e-05	0.0785817	0	0	0.0103385	1.69354e-05	0	0.000232194	0.00408238		0.0182262	9.779e-05	0.0684134	0	1.38102e-05	0.0100878	1.69354e-05	0	1.41512e-05	0.00302322		0.0121297	9.779e-05	0.0717749	0	0	0.00837297	1.69354e-05	0	0.000102278	0.00302322		0.0100561
CV3,50,N20	0.000144066	0.0861344	0	0	0.011418	2.62415e-05	0	0.00167427	0.00581519		0.0244178	0.000144066	0.073721	0	2.1399e-05	0.0138939	2.62415e-05	0	0.000266069	0.00433157		0.0140561	0.000144066	0.0757888	0	0	0.00899965	2.62415e-05	0	0.000419831	0.00433157		0.0163862
CV3,50,N50	0.000236038	0.0928634	0	0	0.0140723	4.80742e-05	0	0.00182159	0.0123028		0.0289683	0.00046102	0.0837318	0	3.92028e-05	0.0218052	4.80742e-05	4.51992e-05	0.000943901	0.0111336		0.0177033	0.00046102	0.0867436	0	0	0.0106167	4.80742e-05	3.74306e-05	0.000574422	0.0111336		0.022533
CV3,50,R10	0.000200391	0.160039	0	0	0.00624634	0	0	3.40075e-05	0.00327552		0.0429526	0.000200391	0.146423	0	0	0.0144885	0	0	3.90625e-07	0.00229211		0.0180158	0.000200391	0.144706	0	0	0.00513792	0	0	7.59878e-05	0.00229211		0.0248139
CV3,50,R20	0.000300391	0.179306	0	0	0.00751319	0	0	0.00180348	0.00821216		0.0603389	0.000300391	0.161468	0	0	0.0276379	0	0	0.000289378	0.00358661		0.0225442	0.000300391	0.155999	0	0	0.00572461	0	0	0.000600774	0.00358661		0.0437734
CV3,50,R50	0.000517448	0.198437	0	0	0.0129305	0	0	0.00229054	0.0279532		0.0742806	0.000587388	0.190723	0	0.000303951	0.0511982	0	0.000210501	0.00110101	0.0312548		0.0294707	0.000587388	0.185485	0	0	0.00912553	0	0.000199203	0.000983947	0.0312548		0.0602744
CV3,50,P10	0.00022	0.160408	0	0	0.00651075	0	0	5.69253e-05	0.00338291		0.0431119	0.00022	0.146768	0	0	0.0146633	0	0	2e-05	0.00235627		0.0180765	0.00022	0.145025	0	0	0.00545865	0	0	7.59878e-05	0.00235627		0.0248772
CV3,50,P20	0.00031	0.179433	0	0	0.00762072	0	0	0.00181454	0.00824594		0.0604205	0.00031	0.161567	0	0	0.0277323	0	0	0.000313333	0.00362894		0.0226024	0.00031	0.156098	0	0	0.00588382	0	0	0.000612738	0.00362894		0.0438411
CV3,50,P50	0.000524667	0.19848	0	0	0.0129832	0	0	0.00229842	0.0279732		0.0743329	0.000613162	0.190755	0	0.000303951	0.051256	0	0.000210501	0.00111906	0.0312752		0.029527	0.000613162	0.185521	0	0	0.00921676	0	0.000199203	0.000989638	0.0312752		0.0603253
CV3,50,M10	6.22222e-05	0.0418016	0	0	0.00915542	0	0	0.000238745	0.00280132		0.00795601	6.22222e-05	0.0340794	0	0	0.00654043	0	0	2.22222e-05	0.00182711		0.00831738	6.22222e-05	0.0384433	0	0	0.00617348	0	0	3.37724e-05	0.00182711		0.00409679
CV3,50,M20	7.27485e-05	0.0437534	0	0	0.00933182	0	0	0.000706996	0.00326994		0.00971606	7.27485e-05	0.0354997	0	0	0.00784701	0	0	0.000100781	0.00222346		0.00886947	7.27485e-05	0.0395859	0	0	0.00636921	0	0	0.000111449	0.00222346		0.00589715
CV3,50,M50	7.92078e-05	0.0447922	0	0	0.00973093	0	0	0.000719338	0.00402538		0.0103765	0.000125921	0.0369898	0	9.49848e-06	0.00889223	0	1.03139e-05	0.000193291	0.00315726		0.00946517	0.000125921	0.0411928	0	0	0.00652146	0	5.10777e-06	0.000126455	0.00315726		0.00688938
classification	0.443413	0.76889	0.489739	0.685229	0.709057	0.709099	0.639875	0.338741	0.663035	0.546353	0.700716	0.437559	0.820476	0.308834	0.75281	0.808256	0.726842	0.728607	0.358328	0.662766	0.638539	0.730913	0.442296	0.770942	0.342293	0.711897	0.755735	0.69603	0.695811	0.355092	0.615246	0.606743	0.688858
ranking50	0.137398	0.308319	0.23146	0.203532	0.233581	0.24874	0.208136	0.0158959	0.280393	0	0.261263	0.137001	0.24837	0.13856	0.124612	0.235136	0.242422	0.191395	0.0135221	0.269112	0	0.244569	0.137001	0.268133	0.174737	0.156536	0.230423	0.244455	0.19561	0.014122	0.269112	0	0.251782
overall	0.290405	0.538605	0.3606	0.444381	0.471319	0.478919	0.424006	0.177318	0.471714	0.273177	0.48099	0.28728	0.534423	0.223697	0.438711	0.521696	0.484632	0.460001	0.185925	0.465939	0.31927	0.487741	0.289648	0.519537	0.258515	0.434216	0.493079	0.470243	0.445711	0.184607	0.442179	0.303371	0.47032
nclassification	0.24334	1	0.351037	0.805507	0.8609	0.860998	0.700069	0	0.75391	0.482652	0.84151	0.251593	1	0	0.867748	0.976117	0.816994	0.820443	0.096736	0.691758	0.644407	0.824951	0.233299	1	0	0.862255	0.964525	0.825238	0.824728	0.0298598	0.636777	0.616938	0.808507
nranking50	0.445635	1	0.750716	0.660136	0.757595	0.806763	0.675068	0.0515568	0.909425	0	0.847381	0.509085	0.922925	0.51488	0.46305	0.87375	0.900823	0.711208	0.050247	1	0	0.9088	0.509085	0.996361	0.64931	0.581675	0.856234	0.908378	0.726874	0.0524763	1	0	0.935605
noverall	0.344487	1	0.550877	0.732822	0.809248	0.83388	0.687568	0.0257784	0.831668	0.241326	0.844445	0.380339	0.961463	0.25744	0.665399	0.924933	0.858908	0.765826	0.0734915	0.845879	0.322203	0.866875	0.371192	0.998181	0.324655	0.721965	0.910379	0.866808	0.775801	0.0411681	0.818388	0.308469	0.872056
ranking10	0.111376	0.23283	0.196279	0.157295	0.205982	0.212371	0.167389	0.0111475	0.206003	0	0.222381	0.11088	0.178494	0.0987674	0.0790159	0.201838	0.206483	0.148935	0.00846406	0.204541	0	0.204613	0.11088	0.187837	0.147032	0.102754	0.2043	0.208636	0.145895	0.00827458	0.204541	0	0.211478
nranking10	0.478359	1	0.843015	0.675581	0.884689	0.912132	0.718932	0.0478782	0.884779	0	0.955122	0.536992	0.864449	0.478332	0.382675	0.977506	1	0.721296	0.0409915	0.990594	0	0.990944	0.524308	0.888213	0.695259	0.485887	0.966058	0.986561	0.689881	0.0391273	0.967197	0	1
ranking20	0.120298	0.271001	0.213313	0.17821	0.22183	0.22883	0.18439	0.0128936	0.239072	0	0.240727	0.120265	0.210022	0.113282	0.0970901	0.21913	0.221358	0.162157	0.00958913	0.240402	0	0.224426	0.120265	0.223953	0.155925	0.124894	0.217827	0.223472	0.169119	0.0103569	0.240402	0	0.231572
nranking20	0.443901	1	0.78713	0.657597	0.818555	0.844386	0.680403	0.0475776	0.882181	0	0.888286	0.500265	0.873627	0.471217	0.403866	0.911516	0.920782	0.674525	0.0398879	1	0	0.933544	0.500265	0.931577	0.6486	0.51952	0.906097	0.929576	0.703486	0.0430815	1	0	0.963272
classification20	0.474944	0.801727	0.534898	0.723277	0.76268	0.74632	0.747998	0.407756	0.707905	0.728471	0.741843	0.467501	0.853647	0.357682	0.794265	0.866328	0.762864	0.853044	0.435102	0.702364	0.851386	0.764693	0.476411	0.807442	0.37938	0.75713	0.822055	0.73108	0.816822	0.431384	0.656194	0.80899	0.734236
time_cv1_1	0.905128	0	0.870437	0.575624	0.589826	0.982727	1	0.560965	0.831285	0.736001	0.292943	0.821737	0	0.606647	0.326463	0.0352306	0.948666	1	0.301153	0.687264	0.560643	0.266275	0.88624	0	0.643858	0.246919	0.0989262	0.952207	1	0.273602	0.675841	0.509338	0.316034
timestr_cv1_1	22m	3.4h	29m	1.5h	1.4h	7m	3m	1.5h	37m	56m	2.4h	31m	2.6h	1.1h	1.8h	2.5h	11m	4m	1.9h	52m	1.2h	1.9h	21m	2.7h	59m	2.0h	2.4h	11m	4m	2.0h	54m	1.3h	1.8h
time_cv1_5	0.952902	0	0.875121	0.601291	0.648441	0.982605	1	0.560105	0.84536	0.428931	0.297508	0.940378	0.422981	0.68465	0.332327	0.391318	0.988379	1	0.399447	0.736964	0	0.405634	0.90742	0.208453	0.532781	0.155009	0	0.950312	1	0.272746	0.599047	0.0794719	0.184196
timestr_cv1_5	14m	3.3h	29m	1.4h	1.2h	8m	4m	1.5h	35m	1.9h	2.4h	15m	1.8h	1.0h	2.1h	1.9h	6m	4m	1.9h	52m	3.1h	1.9h	17m	1.8h	1.1h	1.9h	2.3h	11m	4m	1.7h	57m	2.1h	1.9h
time_cv1_20	0.981265	0.660882	0.945602	0.73167	0.857622	0.989038	1	0.801772	0.933284	0	0.789421	0.955479	0.672073	0.860953	0.690072	0.616565	0.994407	1	0.723824	0.84327	0	0.665244	0.956469	0.78909	0.846177	0.689101	0.795224	0.999668	1	0.740194	0.883221	0	0.701552
timestr_cv1_20	14m	2.5h	29m	2.0h	1.1h	11m	6m	1.5h	34m	7.2h	1.6h	20m	1.9h	51m	1.8h	2.2h	7m	5m	1.6h	57m	5.6h	1.9h	22m	1.4h	1.1h	2.0h	1.4h	6m	6m	1.7h	50m	6.4h	2.0h
time_cv1_50	0.700012	0.572159	0.870278	0	0.454506	0.981548	1	0.282227	0.75703		0.199805	0.933797	0	0.709829	0.199	0.115017	0.946312	1	0.331041	0.696668		0.195298	0.69232	0.141944	0.526422	0.0079865	0	0.974022	1	0.162176	0.595023		0.0065166
timestr_cv1_50	43m	59m	22m	2.2h	1.2h	8m	6m	1.6h	36m		1.7h	15m	2.7h	49m	2.1h	2.4h	13m	4m	1.8h	51m		2.2h	42m	1.8h	1.0h	2.1h	2.1h	8m	4m	1.8h	54m		2.1h
time_cv2_1	0.944807	0.647361	0.80899	0.388383	0	0.948981	1	0.48166	0.784413	0.81544	0.436311	0.834669	0.153152	0.739687	0.0891352	0	0.963603	1	0.176426	0.666975	0.944138	0.262386	0.931313	0.173756	0.771296	0.0884473	0	0.930346	1	0.245195	0.658688	0.872499	0.176723
timestr_cv2_1	13m	1.0h	34m	1.7h	2.7h	12m	4m	1.5h	38m	33m	1.6h	26m	2.0h	39m	2.2h	2.4h	8m	3m	2.0h	49m	11m	1.8h	13m	2.0h	35m	2.2h	2.4h	13m	3m	1.8h	51m	21m	2.0h
time_cv2_5	0.928748	0.630648	0.756684	0	0.366352	0.912786	1	0.33446	0.754691	0.587437	0.283684	0.90564	0.198172	0.740041	0.224002	0	0.971521	1	0.270418	0.695143	0.186627	0.245208	0.867017	0.164881	0.768076	0.127433	0	0.945904	1	0.272508	0.687649	0.498836	0.14084
timestr_cv2_5	13m	51m	35m	2.2h	1.4h	15m	4m	1.5h	35m	56m	1.6h	17m	1.9h	39m	1.8h	2.3h	8m	4m	1.7h	45m	1.9h	1.7h	22m	1.9h	35m	2.0h	2.3h	11m	4m	1.7h	46m	1.2h	2.0h
time_cv2_20	0.955005	0.736226	0.925738	0.512041	0.589922	0.958585	1	0.570985	0.83547	0	0.493822	0.945145	0.63745	0.862525	0.516258	0.730225	0.981844	1	0.599463	0.844938	0	0.732681	0.955305	0.571692	0.886522	0.502833	0.560339	0.999749	1	0.620719	0.846197	0	0.585125
timestr_cv2_20	13m	53m	19m	1.6h	1.3h	13m	5m	1.4h	35m	3.1h	1.6h	19m	1.6h	39m	2.1h	1.2h	10m	5m	1.7h	44m	4.2h	1.2h	18m	1.9h	35m	2.2h	1.9h	6m	6m	1.7h	45m	4.3h	1.8h
time_cv2_50	0.716582	0.64163	0.868389	0.239923	0	0.97749	1	0.378227	0.773585		0.239999	0.893129	0.183503	0.709948	0	0.139766	0.97254	1	0.143003	0.655426		0.253248	0.743858	0	0.750556	0.0366484	0.0472146	0.982736	1	0.183952	0.646812		0.174353
timestr_cv2_50	40m	50m	22m	1.7h	2.1h	8m	5m	1.4h	33m		1.7h	18m	1.7h	40m	2.0h	1.8h	9m	6m	1.8h	46m		1.6h	36m	2.1h	35m	2.0h	2.0h	7m	5m	1.7h	47m		1.7h
time_cv3_1	0.934205	0	0.822838	0.39722	0.585043	0.948143	1	0.491428	0.856103	0.809695	0.507886	0.865116	0.587512	0.667292	0.0845909	0.220739	0.948295	1	0	0.724515	0.799254	0.290043	0.89429	0.644564	0.742404	0.0722127	0	0.931603	1	0.0639767	0.736793	0.729768	0.266985
timestr_cv3_1	13m	2.6h	30m	1.6h	1.1h	11m	3m	1.3h	25m	32m	1.3h	18m	49m	40m	1.8h	1.5h	9m	3m	1.9h	34m	26m	1.4h	16m	43m	33m	1.8h	1.9h	12m	4m	1.8h	33m	34m	1.4h
time_cv3_5	0.93223	0.0847201	0.791575	0	0.360464	0.898389	1	0.39982	0.822601	0.259114	0.406346	0.87513	0.481636	0.590366	0.0826814	0	0.932028	1	0.0911551	0.724105	0.0672792	0.243396	0.656494	0.610605	0.779425	0.212436	0	0.987921	1	0.224278	0.780802	0.115273	0.358333
timestr_cv3_5	12m	2.0h	30m	2.1h	1.4h	16m	4m	1.3h	26m	1.6h	1.3h	16m	56m	45m	1.6h	1.8h	10m	3m	1.6h	32m	1.6h	1.3h	48m	54m	32m	1.7h	2.2h	6m	5m	1.7h	32m	1.9h	1.4h
time_cv3_20	0.978043	0.902806	0.899572	0.657968	0.631251	0.987158	1	0.707596	0.914645	0	0.677463	0.93019	0.785318	0.827858	0.611302	0.699189	0.97963	1	0.596957	0.884997	0	0.665518	0.922869	0.793677	0.888043	0.626911	0.547186	0.995244	1	0.593196	0.882762	0	0.657645
timestr_cv3_20	10m	29m	30m	1.5h	1.6h	8m	5m	1.3h	26m	4.2h	1.4h	22m	56m	46m	1.6h	1.3h	10m	5m	1.7h	32m	4.0h	1.4h	24m	55m	33m	1.6h	1.9h	7m	5m	1.7h	34m	4.1h	1.5h
time_cv3_50	0.938326	0.68571	0.830565	0	0.00581812	0.930967	1	0.17015	0.74601		0.0628964	0.806931	0.588826	0.575561	0.10345	0.363717	0.964623	1	0	0.7312		0.206076	0.572745	0.563913	0.753605	0.181641	0	0.979782	1	0.105778	0.747131		0.24899
timestr_cv3_50	11m	33m	20m	1.5h	1.5h	12m	6m	1.3h	28m		1.4h	24m	46m	47m	1.6h	1.1h	9m	5m	1.7h	32m		1.4h	52m	53m	33m	1.6h	1.9h	8m	6m	1.7h	33m		1.5h

## Sheet: SLMGAE
Strategy	Model	neg/pos	NSM	AUROC	F1	AUPR	NDCG@10	NDCG@20	NDCG@50	Recall@10	Recall@20	Recall@50	Precision@10	Precision@20	Precision@50	MAP@10	MAP@20	MAP@50
CV1	SLMGAE	1	random	0.9344 (0.0027)	0.9504 (0.002)	0.8832 (0.0041)	0.2699 (0.0109)	0.2927 (0.0113)	0.316 (0.0109)	0.3198 (0.0115)	0.3778 (0.0141)	0.4421 (0.0164)	0.3222 (0.0117)	0.3785 (0.0141)	0.4422 (0.0164)	0.2514 (0.0104)	0.2504 (0.0103)	0.2469 (0.0098)
CV2	SLMGAE	1	random	0.8535 (0.0157)	0.873 (0.0135)	0.779 (0.0167)	0.1006 (0.015)	0.1152 (0.0165)	0.1326 (0.0182)	0.1244 (0.0199)	0.1606 (0.0382)	0.2075 (0.0584)	0.127 (0.02)	0.1617 (0.0381)	0.2077 (0.0584)	0.0855 (0.0146)	0.0877 (0.0135)	0.0873 (0.0129)
CV3	SLMGAE	1	random	0.7901 (0.0392)	0.7964 (0.0449)	0.7378 (0.0235)	0.0392 (0.0529)	0.0547 (0.0563)	0.0658 (0.057)	0.0835 (0.1138)	0.1311 (0.1293)	0.1701 (0.1426)	0.0839 (0.1141)	0.1312 (0.1293)	0.1701 (0.1427)	0.0188 (0.0261)	0.023 (0.0268)	0.0248 (0.0268)
CV1	SLMGAE	5	random	0.9399 (0.0018)	0.8913 (0.0026)	0.8546 (0.0031)	0.3088 (0.0065)	0.3306 (0.0065)	0.3513 (0.0076)	0.3661 (0.013)	0.4241 (0.0169)	0.4826 (0.0238)	0.3708 (0.0137)	0.4257 (0.0172)	0.4827 (0.0238)	0.2886 (0.0061)	0.2879 (0.0064)	0.2828 (0.0064)
CV2	SLMGAE	5	random	0.8651 (0.02)	0.7092 (0.0334)	0.6544 (0.031)	0.1182 (0.0172)	0.1408 (0.0196)	0.158 (0.0193)	0.1427 (0.0298)	0.2057 (0.0629)	0.2566 (0.0707)	0.1458 (0.0299)	0.2071 (0.0627)	0.2569 (0.0706)	0.1024 (0.0168)	0.1062 (0.0143)	0.1061 (0.0133)
CV3	SLMGAE	5	random	0.8105 (0.0473)	0.5476 (0.0912)	0.549 (0.0677)	0.0343 (0.0508)	0.0509 (0.0545)	0.0702 (0.0515)	0.0723 (0.1071)	0.12 (0.1235)	0.1862 (0.1256)	0.0726 (0.1073)	0.1201 (0.1235)	0.1863 (0.1256)	0.0168 (0.0254)	0.0215 (0.0264)	0.0246 (0.0257)
CV1	SLMGAE	20	random	0.9334 (0.0032)	0.8201 (0.0058)	0.8086 (0.0043)	0.3363 (0.0093)	0.358 (0.0098)	0.3795 (0.0106)	0.4039 (0.0112)	0.4634 (0.0123)	0.5277 (0.0164)	0.4113 (0.0111)	0.4661 (0.0123)	0.5278 (0.0164)	0.3143 (0.0094)	0.3127 (0.0091)	0.3068 (0.0092)
CV2	SLMGAE	20	random	0.8677 (0.0215)	0.533 (0.0264)	0.5472 (0.0207)	0.1346 (0.0159)	0.1513 (0.0145)	0.1643 (0.0141)	0.1791 (0.032)	0.2239 (0.0511)	0.258 (0.0616)	0.182 (0.0316)	0.2253 (0.0506)	0.2584 (0.0615)	0.1122 (0.0147)	0.1148 (0.0129)	0.1139 (0.012)
CV3	SLMGAE	20	random	0.8023 (0.0622)	0.3158 (0.08)	0.3744 (0.061)	0.0726 (0.0732)	0.0822 (0.0704)	0.0911 (0.0682)	0.1448 (0.1366)	0.1687 (0.134)	0.1959 (0.13)	0.1451 (0.1368)	0.1688 (0.134)	0.196 (0.13)	0.0393 (0.0436)	0.0419 (0.0427)	0.0432 (0.0422)
CV1	SLMGAE	50	random	0.933 (0.0021)	0.7615 (0.0047)	0.7571 (0.0035)	0.351 (0.0086)	0.3701 (0.0086)	0.3889 (0.0093)	0.4105 (0.0112)	0.464 (0.0136)	0.5193 (0.0177)	0.4187 (0.011)	0.4671 (0.0136)	0.5195 (0.0177)	0.3307 (0.0088)	0.3289 (0.0089)	0.3223 (0.0087)
CV2	SLMGAE	50	random	0.865 (0.0232)	0.3992 (0.0374)	0.4532 (0.0327)	0.1445 (0.0146)	0.1577 (0.0163)	0.1682 (0.0165)	0.1978 (0.0368)	0.2288 (0.0512)	0.2557 (0.0618)	0.2003 (0.0362)	0.23 (0.0507)	0.256 (0.0617)	0.1187 (0.0131)	0.12 (0.012)	0.1187 (0.0113)
CV3	SLMGAE	50	random	0.8056 (0.063)	0.2027 (0.0691)	0.2793 (0.0579)	0.0786 (0.0697)	0.0861 (0.0674)	0.0929 (0.0638)	0.16 (0.1418)	0.1793 (0.1404)	0.1984 (0.1323)	0.1604 (0.1421)	0.1794 (0.1404)	0.1985 (0.1323)	0.0418 (0.0377)	0.0438 (0.0369)	0.0448 (0.0362)
CV1	SLMGAE	1	exp	0.9764 (0.0026)	0.98 (0.0015)	0.9339 (0.0024)	0.2264 (0.0046)	0.2474 (0.0049)	0.2651 (0.0039)	0.2683 (0.0079)	0.3185 (0.0082)	0.3716 (0.0086)	0.2694 (0.0078)	0.3189 (0.0082)	0.3717 (0.0086)	0.2102 (0.0035)	0.2154 (0.0048)	0.2123 (0.0044)
CV2	SLMGAE	1	exp	0.9005 (0.018)	0.9145 (0.0167)	0.8335 (0.018)	0.0646 (0.0025)	0.0819 (0.0112)	0.1029 (0.0227)	0.08 (0.0233)	0.126 (0.0526)	0.1941 (0.098)	0.0819 (0.0233)	0.1268 (0.0527)	0.1943 (0.098)	0.0583 (0.0102)	0.06 (0.0067)	0.0572 (0.005)
CV3	SLMGAE	1	exp	0.804 (0.0584)	0.8335 (0.0567)	0.761 (0.0458)	0.0243 (0.0308)	0.0356 (0.042)	0.0485 (0.0472)	0.0495 (0.0681)	0.0823 (0.1047)	0.1274 (0.1313)	0.0497 (0.0683)	0.0824 (0.1047)	0.1274 (0.1314)	0.0119 (0.0144)	0.015 (0.0177)	0.0171 (0.0184)
CV1	SLMGAE	5	exp	0.9754 (0.0021)	0.9499 (0.0038)	0.9085 (0.0039)	0.2452 (0.0143)	0.2656 (0.0154)	0.2837 (0.0161)	0.294 (0.0136)	0.3456 (0.0185)	0.3994 (0.0222)	0.296 (0.0145)	0.3463 (0.0189)	0.3995 (0.0222)	0.2256 (0.0171)	0.2284 (0.0157)	0.2256 (0.0142)
CV2	SLMGAE	5	exp	0.9056 (0.0209)	0.7946 (0.035)	0.7255 (0.0334)	0.0918 (0.0204)	0.1055 (0.0254)	0.1196 (0.0308)	0.1172 (0.0473)	0.1508 (0.0679)	0.192 (0.0934)	0.1195 (0.0473)	0.1517 (0.068)	0.1922 (0.0934)	0.0745 (0.015)	0.0759 (0.0154)	0.0753 (0.0153)
CV3	SLMGAE	5	exp	0.826 (0.0659)	0.6358 (0.1165)	0.5928 (0.0883)	0.0332 (0.0425)	0.0537 (0.0508)	0.0679 (0.0513)	0.0716 (0.0912)	0.1355 (0.1223)	0.183 (0.1363)	0.0718 (0.0914)	0.1356 (0.1224)	0.1831 (0.1363)	0.0155 (0.0208)	0.0212 (0.0228)	0.0235 (0.0228)
CV1	SLMGAE	20	exp	0.9657 (0.0031)	0.8975 (0.0044)	0.8698 (0.0026)	0.2778 (0.0048)	0.3009 (0.0054)	0.3243 (0.0045)	0.3183 (0.0098)	0.3796 (0.0117)	0.4472 (0.0098)	0.3213 (0.0096)	0.3808 (0.0116)	0.4473 (0.0098)	0.2652 (0.0059)	0.2655 (0.0059)	0.26 (0.0053)
CV2	SLMGAE	20	exp	0.8918 (0.0227)	0.612 (0.0287)	0.5887 (0.0239)	0.0954 (0.0182)	0.1052 (0.0195)	0.1177 (0.0191)	0.1029 (0.0174)	0.1299 (0.0354)	0.1632 (0.0425)	0.105 (0.0176)	0.1306 (0.0354)	0.1634 (0.0425)	0.0862 (0.018)	0.0874 (0.0174)	0.0849 (0.016)
CV3	SLMGAE	20	exp	0.8228 (0.0681)	0.4006 (0.1162)	0.4325 (0.0892)	0.0501 (0.0514)	0.0632 (0.0563)	0.0753 (0.0543)	0.1114 (0.1105)	0.1507 (0.1308)	0.1893 (0.1308)	0.1117 (0.1107)	0.1508 (0.1308)	0.1893 (0.1308)	0.0232 (0.0256)	0.0269 (0.0269)	0.0288 (0.0264)
CV1	SLMGAE	50	exp	0.9566 (0.002)	0.8538 (0.0066)	0.8339 (0.008)	0.3002 (0.0081)	0.3172 (0.0084)	0.3371 (0.0084)	0.3344 (0.0059)	0.3773 (0.0071)	0.4343 (0.0081)	0.3397 (0.0055)	0.3791 (0.0069)	0.4344 (0.0081)	0.286 (0.0121)	0.2848 (0.0116)	0.2797 (0.0114)
CV2	SLMGAE	50	exp	0.8823 (0.0237)	0.4684 (0.0447)	0.4912 (0.0392)	0.1093 (0.0225)	0.1188 (0.0221)	0.1301 (0.0206)	0.1364 (0.0428)	0.1606 (0.0555)	0.1936 (0.0655)	0.1385 (0.0428)	0.1613 (0.0555)	0.1938 (0.0655)	0.0912 (0.0227)	0.0914 (0.0204)	0.0902 (0.0188)
CV3	SLMGAE	50	exp	0.8162 (0.0596)	0.2546 (0.0924)	0.3261 (0.0676)	0.0684 (0.063)	0.0737 (0.0631)	0.0837 (0.06)	0.1464 (0.1313)	0.1615 (0.1342)	0.1907 (0.1309)	0.1468 (0.1316)	0.1616 (0.1342)	0.1908 (0.1309)	0.0341 (0.033)	0.0355 (0.0331)	0.037 (0.0323)
CV1	SLMGAE	1	dep	0.9679 (0.0026)	0.9719 (0.0019)	0.9147 (0.0036)	0.2333 (0.0061)	0.2553 (0.0056)	0.2739 (0.0086)	0.2752 (0.0101)	0.3307 (0.0076)	0.3866 (0.0198)	0.2762 (0.0101)	0.3311 (0.0077)	0.3867 (0.0198)	0.2167 (0.0057)	0.2201 (0.0042)	0.218 (0.0041)
CV2	SLMGAE	1	dep	0.8763 (0.0171)	0.8888 (0.0179)	0.8044 (0.0166)	0.076 (0.0086)	0.0953 (0.0087)	0.1178 (0.0154)	0.0925 (0.0148)	0.1412 (0.0384)	0.2094 (0.0733)	0.0949 (0.0148)	0.142 (0.0385)	0.2096 (0.0733)	0.0693 (0.0164)	0.0669 (0.0104)	0.0658 (0.0082)
CV3	SLMGAE	1	dep	0.7721 (0.0421)	0.7857 (0.0568)	0.7384 (0.0253)	0.0342 (0.0505)	0.0509 (0.0531)	0.068 (0.0513)	0.073 (0.1094)	0.1202 (0.1221)	0.1816 (0.1258)	0.0733 (0.1096)	0.1203 (0.1221)	0.1816 (0.1258)	0.0163 (0.0248)	0.021 (0.0256)	0.0238 (0.025)
CV1	SLMGAE	5	dep	0.9512 (0.0022)	0.9012 (0.003)	0.8523 (0.0048)	0.2545 (0.0058)	0.2777 (0.0054)	0.3023 (0.0043)	0.299 (0.0042)	0.3607 (0.0062)	0.4341 (0.0063)	0.3015 (0.0043)	0.3615 (0.0063)	0.4342 (0.0063)	0.2402 (0.0055)	0.24 (0.0062)	0.2356 (0.0065)
CV2	SLMGAE	5	dep	0.8712 (0.0144)	0.7143 (0.023)	0.6538 (0.0212)	0.0888 (0.0151)	0.1038 (0.0146)	0.1265 (0.0153)	0.103 (0.0251)	0.1442 (0.041)	0.2228 (0.068)	0.1055 (0.0252)	0.145 (0.041)	0.223 (0.068)	0.0778 (0.0169)	0.0801 (0.0158)	0.0802 (0.0144)
CV3	SLMGAE	5	dep	0.7797 (0.0418)	0.506 (0.083)	0.5059 (0.0603)	0.0419 (0.0557)	0.0585 (0.057)	0.0735 (0.0552)	0.0888 (0.118)	0.1379 (0.1282)	0.1898 (0.1305)	0.0891 (0.1183)	0.138 (0.1282)	0.1899 (0.1305)	0.0201 (0.0281)	0.0247 (0.0283)	0.0272 (0.0278)
CV1	SLMGAE	20	dep	0.9365 (0.001)	0.8112 (0.0033)	0.7917 (0.0039)	0.2947 (0.0063)	0.3138 (0.0066)	0.3348 (0.0057)	0.3302 (0.0063)	0.3791 (0.0079)	0.4371 (0.0047)	0.3339 (0.0062)	0.3805 (0.0077)	0.4372 (0.0047)	0.2829 (0.0064)	0.2819 (0.006)	0.2758 (0.0063)
CV2	SLMGAE	20	dep	0.8533 (0.0263)	0.5174 (0.03)	0.5331 (0.0236)	0.1073 (0.0122)	0.1227 (0.0141)	0.1374 (0.0154)	0.1378 (0.0268)	0.1821 (0.0529)	0.2259 (0.0736)	0.14 (0.027)	0.1829 (0.0529)	0.2261 (0.0736)	0.0919 (0.0153)	0.0942 (0.0134)	0.0934 (0.0123)
CV3	SLMGAE	20	dep	0.7895 (0.043)	0.2787 (0.0746)	0.35 (0.0693)	0.0588 (0.0577)	0.069 (0.0585)	0.0788 (0.0574)	0.1277 (0.1208)	0.1565 (0.1285)	0.1851 (0.1284)	0.1281 (0.121)	0.1566 (0.1285)	0.1851 (0.1284)	0.0285 (0.0302)	0.0315 (0.0303)	0.0329 (0.03)
CV1	SLMGAE	50	dep	0.9279 (0.0023)	0.7484 (0.0065)	0.7432 (0.0093)	0.3143 (0.0066)	0.3297 (0.0085)	0.3486 (0.0081)	0.3391 (0.0086)	0.3788 (0.0138)	0.4348 (0.0136)	0.3455 (0.0092)	0.3813 (0.0144)	0.4351 (0.0136)	0.3053 (0.0073)	0.3025 (0.0073)	0.2951 (0.0078)
CV2	SLMGAE	50	dep	0.8537 (0.0254)	0.394 (0.0251)	0.4464 (0.0215)	0.1183 (0.0143)	0.1311 (0.0154)	0.141 (0.018)	0.1462 (0.0322)	0.184 (0.0599)	0.213 (0.0743)	0.1482 (0.0319)	0.1846 (0.0599)	0.2131 (0.0743)	0.1015 (0.0134)	0.1034 (0.0113)	0.1023 (0.011)
CV3	SLMGAE	50	dep	0.7737 (0.0492)	0.1775 (0.0573)	0.2639 (0.0488)	0.0718 (0.0644)	0.0758 (0.0653)	0.0867 (0.0614)	0.1447 (0.1319)	0.156 (0.1368)	0.1855 (0.13)	0.145 (0.1321)	0.1561 (0.1368)	0.1855 (0.13)	0.0384 (0.0346)	0.0396 (0.0349)	0.0412 (0.0339)

## Sheet: SL2MF
Strategy	Model	neg/pos	NSM	AUROC	F1	AUPR	NDCG@10	NDCG@20	NDCG@50	Recall@10	Recall@20	Recall@50	Precision@10	Precision@20	Precision@50	MAP@10	MAP@20	MAP@50
CV1	SL2MF	1	random	0.7812 (0.0032)	0.8633 (0.0016)	0.7662 (0.0023)	0.2807 (0.0041)	0.2917 (0.0044)	0.311 (0.0044)	0.2642 (0.0035)	0.291 (0.0046)	0.3401 (0.0059)	0.2694 (0.0035)	0.2924 (0.0047)	0.3407 (0.0059)	0.2861 (0.0036)	0.2821 (0.0035)	0.2769 (0.0041)
CV2	SL2MF	1	random	0.3027 (0.0162)	0.4342 (0.0101)	0.6667 (0.0)	0.0052 (0.0008)	0.0062 (0.0009)	0.0078 (0.0012)	0.0041 (0.0006)	0.0058 (0.0008)	0.0089 (0.0017)	0.0046 (0.0007)	0.006 (0.0008)	0.0091 (0.0017)	0.0049 (0.0007)	0.005 (0.0008)	0.005 (0.0008)
CV3	SL2MF	1	random	0.3764 (0.024)	0.4119 (0.0099)	0.6672 (0.0003)	0.0001 (0.0002)	0.0001 (0.0003)	0.0002 (0.0005)	0.0002 (0.0004)	0.0003 (0.0006)	0.0005 (0.001)	0.0002 (0.0004)	0.0003 (0.0006)	0.0005 (0.001)	0.0001 (0.0001)	0.0001 (0.0001)	0.0001 (0.0002)
CV1	SL2MF	5	random	0.7814 (0.0036)	0.7373 (0.0035)	0.7377 (0.0053)	0.2807 (0.0041)	0.2917 (0.0044)	0.311 (0.0044)	0.2642 (0.0035)	0.291 (0.0046)	0.3401 (0.0059)	0.2694 (0.0035)	0.2924 (0.0047)	0.3407 (0.0059)	0.2861 (0.0036)	0.2821 (0.0035)	0.2769 (0.0041)
CV2	SL2MF	5	random	0.3029 (0.0181)	0.151 (0.0092)	0.2857 (0.0)	0.0052 (0.0008)	0.0062 (0.0009)	0.0078 (0.0012)	0.0041 (0.0006)	0.0058 (0.0008)	0.0089 (0.0017)	0.0046 (0.0007)	0.006 (0.0008)	0.0091 (0.0017)	0.0049 (0.0007)	0.005 (0.0008)	0.005 (0.0008)
CV3	SL2MF	5	random	0.3776 (0.0231)	0.1256 (0.0044)	0.2863 (0.0002)	0.0001 (0.0002)	0.0001 (0.0003)	0.0002 (0.0005)	0.0002 (0.0004)	0.0003 (0.0006)	0.0005 (0.001)	0.0002 (0.0004)	0.0003 (0.0006)	0.0005 (0.001)	0.0001 (0.0001)	0.0001 (0.0001)	0.0001 (0.0002)
CV1	SL2MF	20	random	0.7812 (0.0034)	0.6508 (0.0036)	0.7031 (0.0047)	0.2807 (0.0041)	0.2917 (0.0044)	0.311 (0.0044)	0.2642 (0.0035)	0.291 (0.0046)	0.3401 (0.0059)	0.2694 (0.0035)	0.2924 (0.0047)	0.3407 (0.0059)	0.2861 (0.0036)	0.2821 (0.0035)	0.2769 (0.0041)
CV2	SL2MF	20	random	0.303 (0.0179)	0.0523 (0.0066)	0.0909 (0.0)	0.0052 (0.0008)	0.0062 (0.0009)	0.0078 (0.0012)	0.0041 (0.0006)	0.0058 (0.0008)	0.0089 (0.0017)	0.0046 (0.0007)	0.006 (0.0008)	0.0091 (0.0017)	0.0049 (0.0007)	0.005 (0.0008)	0.005 (0.0008)
CV3	SL2MF	20	random	0.3757 (0.0213)	0.0348 (0.0012)	0.0912 (0.0002)	0.0001 (0.0002)	0.0001 (0.0003)	0.0002 (0.0005)	0.0002 (0.0004)	0.0003 (0.0006)	0.0005 (0.001)	0.0002 (0.0004)	0.0003 (0.0006)	0.0005 (0.001)	0.0001 (0.0001)	0.0001 (0.0001)	0.0001 (0.0002)
CV1	SL2MF	50	random	0.7812 (0.0034)	0.6003 (0.0061)	0.6636 (0.0047)	0.2807 (0.0041)	0.2917 (0.0044)	0.311 (0.0044)	0.2642 (0.0035)	0.291 (0.0046)	0.3401 (0.0059)	0.2694 (0.0035)	0.2924 (0.0047)	0.3407 (0.0059)	0.2861 (0.0036)	0.2821 (0.0035)	0.2769 (0.0041)
CV2	SL2MF	50	random	0.303 (0.0179)	0.0249 (0.0047)	0.0527 (0.0089)	0.0052 (0.0008)	0.0062 (0.0009)	0.0078 (0.0012)	0.0041 (0.0006)	0.0058 (0.0008)	0.0089 (0.0017)	0.0046 (0.0007)	0.006 (0.0008)	0.0091 (0.0017)	0.0049 (0.0007)	0.005 (0.0008)	0.005 (0.0008)
CV3	SL2MF	50	random	0.375 (0.0202)	0.0142 (0.0005)	0.0386 (0.0001)	0.0001 (0.0002)	0.0001 (0.0003)	0.0002 (0.0005)	0.0002 (0.0004)	0.0003 (0.0006)	0.0005 (0.001)	0.0002 (0.0004)	0.0003 (0.0006)	0.0005 (0.001)	0.0001 (0.0001)	0.0001 (0.0001)	0.0001 (0.0002)
CV1	SL2MF	1	exp	0.7709 (0.0018)	0.8586 (0.0011)	0.7725 (0.0022)	0.2793 (0.0071)	0.2907 (0.0072)	0.3099 (0.007)	0.263 (0.0054)	0.2914 (0.0053)	0.3392 (0.0051)	0.2682 (0.0054)	0.2928 (0.0053)	0.3397 (0.0051)	0.285 (0.0074)	0.2808 (0.0073)	0.2758 (0.0074)
CV2	SL2MF	1	exp	0.2601 (0.0145)	0.413 (0.014)	0.6743 (0.0073)	0.0052 (0.0008)	0.0062 (0.0009)	0.0078 (0.0012)	0.0041 (0.0006)	0.0058 (0.0008)	0.0089 (0.0017)	0.0046 (0.0007)	0.006 (0.0008)	0.0091 (0.0017)	0.0049 (0.0007)	0.005 (0.0008)	0.005 (0.0008)
CV3	SL2MF	1	exp	0.3467 (0.0349)	0.4232 (0.0247)	0.6891 (0.0247)	0.0001 (0.0002)	0.0001 (0.0003)	0.0005 (0.0004)	0.0002 (0.0004)	0.0003 (0.0006)	0.0006 (0.001)	0.0002 (0.0004)	0.0003 (0.0006)	0.0006 (0.001)	0.0001 (0.0001)	0.0001 (0.0001)	0.0001 (0.0001)
CV1	SL2MF	5	exp	0.7753 (0.0023)	0.7367 (0.0025)	0.7406 (0.0034)	0.2793 (0.0071)	0.2907 (0.0072)	0.3099 (0.007)	0.263 (0.0054)	0.2914 (0.0053)	0.3392 (0.0051)	0.2682 (0.0054)	0.2928 (0.0053)	0.3397 (0.0051)	0.285 (0.0074)	0.2808 (0.0073)	0.2758 (0.0074)
CV2	SL2MF	5	exp	0.2729 (0.0144)	0.1418 (0.0088)	0.2931 (0.0069)	0.0052 (0.0008)	0.0062 (0.0009)	0.0078 (0.0012)	0.0041 (0.0006)	0.0058 (0.0008)	0.0089 (0.0017)	0.0046 (0.0007)	0.006 (0.0008)	0.0091 (0.0017)	0.0049 (0.0007)	0.005 (0.0008)	0.005 (0.0008)
CV3	SL2MF	5	exp	0.3684 (0.031)	0.1337 (0.0084)	0.3059 (0.0175)	0.0001 (0.0002)	0.0001 (0.0003)	0.0005 (0.0004)	0.0002 (0.0004)	0.0003 (0.0006)	0.0006 (0.001)	0.0002 (0.0004)	0.0003 (0.0006)	0.0006 (0.001)	0.0001 (0.0001)	0.0001 (0.0001)	0.0001 (0.0001)
CV1	SL2MF	20	exp	0.7783 (0.0022)	0.6564 (0.0034)	0.7066 (0.0042)	0.2793 (0.0071)	0.2907 (0.0072)	0.3099 (0.007)	0.263 (0.0054)	0.2914 (0.0053)	0.3392 (0.0051)	0.2682 (0.0054)	0.2928 (0.0053)	0.3397 (0.0051)	0.285 (0.0074)	0.2808 (0.0073)	0.2758 (0.0074)
CV2	SL2MF	20	exp	0.284 (0.0149)	0.049 (0.0063)	0.0936 (0.0023)	0.0052 (0.0008)	0.0062 (0.0009)	0.0078 (0.0012)	0.0041 (0.0006)	0.0058 (0.0008)	0.0089 (0.0017)	0.0046 (0.0007)	0.006 (0.0008)	0.0091 (0.0017)	0.0049 (0.0007)	0.005 (0.0008)	0.005 (0.0008)
CV3	SL2MF	20	exp	0.3831 (0.0281)	0.0378 (0.0016)	0.0985 (0.0054)	0.0001 (0.0002)	0.0001 (0.0003)	0.0005 (0.0004)	0.0002 (0.0004)	0.0003 (0.0006)	0.0006 (0.001)	0.0002 (0.0004)	0.0003 (0.0006)	0.0006 (0.001)	0.0001 (0.0001)	0.0001 (0.0001)	0.0001 (0.0001)
CV1	SL2MF	50	exp	0.7794 (0.0022)	0.6118 (0.0043)	0.6722 (0.0033)	0.2793 (0.0071)	0.2907 (0.0072)	0.3099 (0.007)	0.263 (0.0054)	0.2914 (0.0053)	0.3392 (0.0051)	0.2682 (0.0054)	0.2928 (0.0053)	0.3397 (0.0051)	0.285 (0.0074)	0.2808 (0.0073)	0.2758 (0.0074)
CV2	SL2MF	50	exp	0.2895 (0.0156)	0.0239 (0.0048)	0.0496 (0.008)	0.0052 (0.0008)	0.0062 (0.0009)	0.0078 (0.0012)	0.0041 (0.0006)	0.0058 (0.0008)	0.0089 (0.0017)	0.0046 (0.0007)	0.006 (0.0008)	0.0091 (0.0017)	0.0049 (0.0007)	0.005 (0.0008)	0.005 (0.0008)
CV3	SL2MF	50	exp	0.3802 (0.0261)	0.0153 (0.0006)	0.0414 (0.0021)	0.0001 (0.0002)	0.0001 (0.0003)	0.0005 (0.0004)	0.0002 (0.0004)	0.0003 (0.0006)	0.0006 (0.001)	0.0002 (0.0004)	0.0003 (0.0006)	0.0006 (0.001)	0.0001 (0.0001)	0.0001 (0.0001)	0.0001 (0.0001)
CV1	SL2MF	1	dep	0.7717 (0.0023)	0.8512 (0.0017)	0.7454 (0.004)	0.2793 (0.0071)	0.2907 (0.0072)	0.3099 (0.007)	0.263 (0.0054)	0.2914 (0.0053)	0.3392 (0.0051)	0.2682 (0.0054)	0.2928 (0.0053)	0.3397 (0.0051)	0.285 (0.0074)	0.2808 (0.0073)	0.2758 (0.0074)
CV2	SL2MF	1	dep	0.3469 (0.0254)	0.4704 (0.0174)	0.6734 (0.0113)	0.0052 (0.0008)	0.0062 (0.0009)	0.0078 (0.0012)	0.0041 (0.0006)	0.0058 (0.0008)	0.0089 (0.0017)	0.0046 (0.0007)	0.006 (0.0008)	0.0091 (0.0017)	0.0049 (0.0007)	0.005 (0.0008)	0.005 (0.0008)
CV3	SL2MF	1	dep	0.4885 (0.0311)	0.5055 (0.0239)	0.6817 (0.0268)	0.0001 (0.0002)	0.0001 (0.0003)	0.0005 (0.0004)	0.0002 (0.0004)	0.0003 (0.0006)	0.0006 (0.001)	0.0002 (0.0004)	0.0003 (0.0006)	0.0006 (0.001)	0.0001 (0.0001)	0.0001 (0.0001)	0.0001 (0.0001)
CV1	SL2MF	5	dep	0.7752 (0.0026)	0.712 (0.0032)	0.7036 (0.0041)	0.2793 (0.0071)	0.2907 (0.0072)	0.3099 (0.007)	0.263 (0.0054)	0.2914 (0.0053)	0.3392 (0.0051)	0.2682 (0.0054)	0.2928 (0.0053)	0.3397 (0.0051)	0.285 (0.0074)	0.2808 (0.0073)	0.2758 (0.0074)
CV2	SL2MF	5	dep	0.3326 (0.0228)	0.161 (0.0125)	0.2917 (0.0084)	0.0052 (0.0008)	0.0062 (0.0009)	0.0078 (0.0012)	0.0041 (0.0006)	0.0058 (0.0008)	0.0089 (0.0017)	0.0046 (0.0007)	0.006 (0.0008)	0.0091 (0.0017)	0.0049 (0.0007)	0.005 (0.0008)	0.005 (0.0008)
CV3	SL2MF	5	dep	0.4507 (0.0246)	0.1527 (0.0102)	0.299 (0.0228)	0.0001 (0.0002)	0.0001 (0.0003)	0.0005 (0.0004)	0.0002 (0.0004)	0.0003 (0.0006)	0.0006 (0.001)	0.0002 (0.0004)	0.0003 (0.0006)	0.0006 (0.001)	0.0001 (0.0001)	0.0001 (0.0001)	0.0001 (0.0001)
CV1	SL2MF	20	dep	0.7775 (0.0024)	0.6186 (0.0051)	0.6565 (0.0031)	0.2793 (0.0071)	0.2907 (0.0072)	0.3099 (0.007)	0.263 (0.0054)	0.2914 (0.0053)	0.3392 (0.0051)	0.2682 (0.0054)	0.2928 (0.0053)	0.3397 (0.0051)	0.285 (0.0074)	0.2808 (0.0073)	0.2758 (0.0074)
CV2	SL2MF	20	dep	0.3165 (0.0202)	0.0526 (0.007)	0.0931 (0.0024)	0.0052 (0.0008)	0.0062 (0.0009)	0.0078 (0.0012)	0.0041 (0.0006)	0.0058 (0.0008)	0.0089 (0.0017)	0.0046 (0.0007)	0.006 (0.0008)	0.0091 (0.0017)	0.0049 (0.0007)	0.005 (0.0008)	0.005 (0.0008)
CV3	SL2MF	20	dep	0.4112 (0.023)	0.0395 (0.0023)	0.0967 (0.0069)	0.0001 (0.0002)	0.0001 (0.0003)	0.0005 (0.0004)	0.0002 (0.0004)	0.0003 (0.0006)	0.0006 (0.001)	0.0002 (0.0004)	0.0003 (0.0006)	0.0006 (0.001)	0.0001 (0.0001)	0.0001 (0.0001)	0.0001 (0.0001)
CV1	SL2MF	50	dep	0.7786 (0.0024)	0.5687 (0.0052)	0.6217 (0.0057)	0.2793 (0.0071)	0.2907 (0.0072)	0.3099 (0.007)	0.263 (0.0054)	0.2914 (0.0053)	0.3392 (0.0051)	0.2682 (0.0054)	0.2928 (0.0053)	0.3397 (0.0051)	0.285 (0.0074)	0.2808 (0.0073)	0.2758 (0.0074)
CV2	SL2MF	50	dep	0.3097 (0.019)	0.0249 (0.0049)	0.0525 (0.0092)	0.0052 (0.0008)	0.0062 (0.0009)	0.0078 (0.0012)	0.0041 (0.0006)	0.0058 (0.0008)	0.0089 (0.0017)	0.0046 (0.0007)	0.006 (0.0008)	0.0091 (0.0017)	0.0049 (0.0007)	0.005 (0.0008)	0.005 (0.0008)
CV3	SL2MF	50	dep	0.3935 (0.0222)	0.0156 (0.0008)	0.0409 (0.0026)	0.0001 (0.0002)	0.0001 (0.0003)	0.0005 (0.0004)	0.0002 (0.0004)	0.0003 (0.0006)	0.0006 (0.001)	0.0002 (0.0004)	0.0003 (0.0006)	0.0006 (0.001)	0.0001 (0.0001)	0.0001 (0.0001)	0.0001 (0.0001)

## Sheet: PTGNN
Strategy	Model	neg/pos	NSM	AUROC	F1	AUPR	NDCG@10	NDCG@20	NDCG@50	Recall@10	Recall@20	Recall@50	Precision@10	Precision@20	Precision@50	MAP@10	MAP@20	MAP@50
CV1	PTGNN	1	random	0.9255 (0.0071)	0.9388 (0.0059)	0.8687 (0.0041)	0.2358 (0.009)	0.2525 (0.0089)	0.274 (0.0092)	0.3361 (0.0106)	0.3781 (0.0121)	0.4323 (0.0132)	0.3372 (0.0108)	0.3785 (0.0122)	0.4324 (0.0132)	0.1948 (0.0086)	0.198 (0.0085)	0.1975 (0.0083)
CV2	PTGNN	1	random	0.7898 (0.0493)	0.8194 (0.0463)	0.7328 (0.0337)	0.1203 (0.019)	0.1253 (0.0206)	0.1307 (0.0225)	0.1384 (0.0267)	0.1478 (0.0307)	0.158 (0.0343)	0.1411 (0.0268)	0.1489 (0.0308)	0.1582 (0.0343)	0.1015 (0.0155)	0.101 (0.0151)	0.0991 (0.0143)
CV3	PTGNN	1	random	0.5287 (0.0199)	0.5169 (0.0135)	0.6699 (0.002)	0.0103 (0.0114)	0.0121 (0.0113)	0.0149 (0.0113)	0.0126 (0.0133)	0.0169 (0.0154)	0.022 (0.0163)	0.0127 (0.0134)	0.017 (0.0154)	0.0221 (0.0163)	0.0077 (0.0099)	0.0082 (0.0098)	0.0086 (0.0098)
CV1	PTGNN	5	random	0.9369 (0.0073)	0.8638 (0.0104)	0.8154 (0.0058)	0.2506 (0.0066)	0.265 (0.0061)	0.2834 (0.0055)	0.31 (0.0187)	0.344 (0.0203)	0.3896 (0.0208)	0.3114 (0.0186)	0.3444 (0.0203)	0.3897 (0.0208)	0.2266 (0.014)	0.2278 (0.0136)	0.2247 (0.0134)
CV2	PTGNN	5	random	0.7907 (0.0414)	0.5989 (0.0545)	0.5551 (0.0521)	0.1225 (0.0194)	0.1275 (0.021)	0.1311 (0.0215)	0.1397 (0.0245)	0.1503 (0.0293)	0.1569 (0.0304)	0.1423 (0.0247)	0.1514 (0.0293)	0.1571 (0.0303)	0.1022 (0.0164)	0.1015 (0.0158)	0.1004 (0.0155)
CV3	PTGNN	5	random	0.5382 (0.0273)	0.1844 (0.0225)	0.3025 (0.0067)	0.0044 (0.0035)	0.0067 (0.0069)	0.0094 (0.0071)	0.0084 (0.012)	0.0142 (0.0219)	0.0186 (0.0224)	0.0084 (0.012)	0.0142 (0.022)	0.0187 (0.0225)	0.0023 (0.0011)	0.0031 (0.0021)	0.0035 (0.0021)
CV1	PTGNN	20	random	0.939 (0.0024)	0.7516 (0.0063)	0.7521 (0.0042)	0.277 (0.0078)	0.2926 (0.0087)	0.3109 (0.008)	0.3325 (0.0059)	0.3725 (0.009)	0.4198 (0.0106)	0.3337 (0.0061)	0.3728 (0.0089)	0.4199 (0.0105)	0.2559 (0.0095)	0.2576 (0.0094)	0.2539 (0.0087)
CV2	PTGNN	20	random	0.7945 (0.0443)	0.4122 (0.0632)	0.4397 (0.0515)	0.1459 (0.0149)	0.1537 (0.0145)	0.1618 (0.0167)	0.2018 (0.0388)	0.2201 (0.041)	0.2366 (0.0428)	0.2043 (0.0385)	0.2211 (0.041)	0.2369 (0.0428)	0.1139 (0.0157)	0.1142 (0.015)	0.1133 (0.0146)
CV3	PTGNN	20	random	0.573 (0.0178)	0.0983 (0.0319)	0.1407 (0.0277)	0.0089 (0.0103)	0.0147 (0.0124)	0.0203 (0.0144)	0.0195 (0.0241)	0.0361 (0.032)	0.0529 (0.0412)	0.0196 (0.0242)	0.0362 (0.0321)	0.0529 (0.0412)	0.0041 (0.005)	0.0057 (0.0054)	0.0066 (0.0057)
CV1	PTGNN	50	random	0.9307 (0.0075)	0.655 (0.0188)	0.6818 (0.0157)	0.306 (0.013)	0.3217 (0.014)	0.3382 (0.0149)	0.3643 (0.0205)	0.4047 (0.024)	0.4464 (0.0275)	0.366 (0.0209)	0.4052 (0.0242)	0.4466 (0.0276)	0.2835 (0.0116)	0.2839 (0.0111)	0.28 (0.0103)
CV2	PTGNN	50	random	0.7142 (0.0993)	0.2839 (0.0642)	0.3769 (0.0355)	0.1636 (0.0216)	0.1696 (0.021)	0.1749 (0.0216)	0.2092 (0.0535)	0.2217 (0.0531)	0.2336 (0.0547)	0.2115 (0.0532)	0.2226 (0.0531)	0.234 (0.0548)	0.1317 (0.0172)	0.1318 (0.0169)	0.1312 (0.0169)
CV3	PTGNN	50	random	0.5587 (0.012)	0.0587 (0.0307)	0.1079 (0.0413)	0.0182 (0.0149)	0.0244 (0.0197)	0.029 (0.0216)	0.043 (0.0426)	0.0603 (0.0577)	0.0743 (0.0634)	0.0431 (0.0427)	0.0604 (0.0577)	0.0743 (0.0635)	0.008 (0.0053)	0.0097 (0.0067)	0.0104 (0.007)
CV1	PTGNN	1	exp	0.9611 (0.0026)	0.9673 (0.0019)	0.9178 (0.0018)	0.235 (0.0014)	0.2519 (0.0021)	0.2719 (0.0017)	0.3367 (0.0048)	0.3793 (0.0045)	0.4286 (0.0046)	0.3377 (0.0047)	0.3796 (0.0045)	0.4287 (0.0046)	0.1946 (0.0023)	0.1979 (0.0031)	0.1974 (0.0036)
CV2	PTGNN	1	exp	0.7794 (0.0568)	0.8148 (0.0515)	0.7319 (0.0282)	0.1194 (0.0185)	0.1254 (0.0204)	0.1314 (0.0218)	0.1402 (0.0255)	0.1532 (0.0315)	0.162 (0.0334)	0.1429 (0.0257)	0.1543 (0.0316)	0.1622 (0.0334)	0.1025 (0.0162)	0.1014 (0.0155)	0.0991 (0.0148)
CV3	PTGNN	1	exp	0.5391 (0.0501)	0.5664 (0.0241)	0.6939 (0.0237)	0.0149 (0.018)	0.0197 (0.0191)	0.0238 (0.0206)	0.0302 (0.052)	0.044 (0.0571)	0.0524 (0.0614)	0.0304 (0.0522)	0.0441 (0.0572)	0.0525 (0.0614)	0.0082 (0.007)	0.0093 (0.0071)	0.0098 (0.0072)
CV1	PTGNN	5	exp	0.9608 (0.0032)	0.9315 (0.0049)	0.8907 (0.0034)	0.2444 (0.0044)	0.2636 (0.0046)	0.2824 (0.0053)	0.3313 (0.009)	0.3774 (0.006)	0.4269 (0.0058)	0.3323 (0.0089)	0.3777 (0.0059)	0.427 (0.0058)	0.2106 (0.0083)	0.2139 (0.0084)	0.2132 (0.0084)
CV2	PTGNN	5	exp	0.7758 (0.0378)	0.5853 (0.0409)	0.548 (0.0339)	0.1235 (0.021)	0.1282 (0.0232)	0.1326 (0.0237)	0.135 (0.0261)	0.1438 (0.0303)	0.1529 (0.0312)	0.1375 (0.0265)	0.1447 (0.0304)	0.153 (0.0312)	0.1029 (0.0149)	0.1026 (0.0144)	0.1013 (0.0141)
CV3	PTGNN	5	exp	0.5841 (0.0302)	0.2299 (0.0262)	0.3427 (0.0175)	0.0059 (0.0039)	0.0101 (0.0068)	0.0131 (0.0068)	0.0053 (0.0042)	0.0164 (0.0233)	0.0232 (0.0234)	0.0054 (0.0042)	0.0164 (0.0233)	0.0232 (0.0234)	0.0045 (0.0039)	0.0057 (0.0038)	0.0059 (0.0035)
CV1	PTGNN	20	exp	0.9486 (0.0015)	0.8631 (0.0082)	0.8342 (0.0084)	0.2563 (0.006)	0.2741 (0.0039)	0.2915 (0.004)	0.3387 (0.0115)	0.3852 (0.0054)	0.4297 (0.0055)	0.3395 (0.0115)	0.3855 (0.0054)	0.4298 (0.0055)	0.2244 (0.0053)	0.2276 (0.0047)	0.2254 (0.0041)
CV2	PTGNN	20	exp	0.834 (0.0301)	0.4353 (0.0549)	0.4491 (0.045)	0.1305 (0.0232)	0.1364 (0.0247)	0.1426 (0.0253)	0.1367 (0.0237)	0.15 (0.0282)	0.1626 (0.0294)	0.1393 (0.0239)	0.151 (0.0282)	0.1628 (0.0293)	0.1118 (0.0183)	0.1115 (0.0181)	0.11 (0.0178)
CV3	PTGNN	20	exp	0.5772 (0.0148)	0.0874 (0.0267)	0.1442 (0.0278)	0.0149 (0.0157)	0.0166 (0.016)	0.02 (0.0158)	0.0187 (0.0179)	0.0225 (0.0187)	0.0322 (0.0196)	0.0187 (0.0179)	0.0225 (0.0187)	0.0322 (0.0196)	0.0117 (0.0144)	0.0121 (0.0145)	0.0126 (0.0144)
CV1	PTGNN	50	exp	0.9276 (0.0055)	0.7902 (0.0155)	0.7777 (0.0156)	0.2722 (0.0097)	0.288 (0.0089)	0.3043 (0.0087)	0.3453 (0.0145)	0.3855 (0.0078)	0.4258 (0.0078)	0.3463 (0.0145)	0.3858 (0.0078)	0.4259 (0.0078)	0.2436 (0.0104)	0.2453 (0.0095)	0.2418 (0.0094)
CV2	PTGNN	50	exp	0.8194 (0.0198)	0.306 (0.0311)	0.3587 (0.0367)	0.1361 (0.0229)	0.1429 (0.0249)	0.1496 (0.0256)	0.1358 (0.0204)	0.1509 (0.0253)	0.1656 (0.0292)	0.1383 (0.0205)	0.1519 (0.0252)	0.1658 (0.0292)	0.1209 (0.0189)	0.1204 (0.0191)	0.1172 (0.0188)
CV3	PTGNN	50	exp	0.6383 (0.0207)	0.0771 (0.0384)	0.1271 (0.0471)	0.0121 (0.0163)	0.0141 (0.0171)	0.0177 (0.0179)	0.018 (0.0227)	0.0225 (0.0262)	0.0295 (0.0304)	0.0181 (0.0227)	0.0226 (0.0261)	0.0295 (0.0304)	0.0083 (0.0128)	0.0089 (0.013)	0.0095 (0.0131)
CV1	PTGNN	1	dep	0.9474 (0.0035)	0.9562 (0.0026)	0.9037 (0.0028)	0.2345 (0.0041)	0.2528 (0.005)	0.2717 (0.003)	0.3366 (0.0052)	0.3827 (0.0073)	0.43 (0.0029)	0.3377 (0.0051)	0.3831 (0.0073)	0.4301 (0.0029)	0.1935 (0.0042)	0.1972 (0.0047)	0.1968 (0.0044)
CV2	PTGNN	1	dep	0.7877 (0.0405)	0.8194 (0.0295)	0.7313 (0.0302)	0.1194 (0.0198)	0.125 (0.021)	0.1318 (0.0213)	0.1405 (0.0264)	0.1523 (0.0303)	0.1635 (0.0309)	0.1432 (0.0265)	0.1534 (0.0303)	0.1638 (0.0309)	0.1022 (0.0155)	0.1015 (0.015)	0.0995 (0.0148)
CV3	PTGNN	1	dep	0.5346 (0.0859)	0.5496 (0.07)	0.6896 (0.0235)	0.011 (0.0091)	0.0134 (0.0098)	0.0192 (0.0107)	0.025 (0.0273)	0.0292 (0.029)	0.044 (0.0358)	0.0252 (0.0273)	0.0293 (0.029)	0.0441 (0.0358)	0.0045 (0.003)	0.0052 (0.0032)	0.0061 (0.0033)
CV1	PTGNN	5	dep	0.9263 (0.0029)	0.8601 (0.0048)	0.813 (0.0054)	0.2363 (0.0025)	0.2561 (0.0021)	0.2734 (0.0019)	0.3348 (0.0087)	0.3848 (0.0099)	0.4284 (0.0046)	0.3358 (0.0087)	0.3851 (0.0099)	0.4285 (0.0046)	0.1981 (0.0025)	0.2015 (0.0014)	0.2002 (0.0018)
CV2	PTGNN	5	dep	0.7853 (0.0401)	0.5867 (0.0452)	0.543 (0.0404)	0.1204 (0.0189)	0.1267 (0.0208)	0.1324 (0.022)	0.1411 (0.0255)	0.1535 (0.03)	0.1622 (0.0318)	0.1437 (0.0257)	0.1546 (0.03)	0.1625 (0.0318)	0.1026 (0.0158)	0.1017 (0.0153)	0.0995 (0.0148)
CV3	PTGNN	5	dep	0.5714 (0.0493)	0.2211 (0.0198)	0.3344 (0.0171)	0.0112 (0.0105)	0.0139 (0.0129)	0.0168 (0.0139)	0.027 (0.0306)	0.0344 (0.038)	0.0415 (0.0418)	0.0271 (0.0306)	0.0344 (0.038)	0.0416 (0.0418)	0.0043 (0.0036)	0.0051 (0.0044)	0.0056 (0.0045)
CV1	PTGNN	20	dep	0.9249 (0.0174)	0.7219 (0.0053)	0.7231 (0.0041)	0.2719 (0.0058)	0.2865 (0.0067)	0.304 (0.0067)	0.345 (0.0084)	0.384 (0.0071)	0.4268 (0.0058)	0.3459 (0.0085)	0.3843 (0.0071)	0.4269 (0.0058)	0.2442 (0.0097)	0.2463 (0.009)	0.2429 (0.0077)
CV2	PTGNN	20	dep	0.7657 (0.0753)	0.3881 (0.0733)	0.422 (0.0509)	0.1247 (0.0201)	0.1329 (0.0222)	0.1398 (0.0238)	0.1475 (0.0279)	0.1673 (0.0411)	0.1819 (0.0484)	0.1501 (0.0279)	0.1684 (0.0411)	0.1821 (0.0483)	0.1042 (0.0174)	0.1047 (0.0163)	0.1033 (0.0154)
CV3	PTGNN	20	dep	0.6035 (0.036)	0.0879 (0.0193)	0.1447 (0.0177)	0.0053 (0.0052)	0.0083 (0.0084)	0.0122 (0.0118)	0.01 (0.0131)	0.0181 (0.0224)	0.0304 (0.0365)	0.0101 (0.0131)	0.0182 (0.0225)	0.0304 (0.0365)	0.0026 (0.0023)	0.0035 (0.0032)	0.004 (0.0037)
CV1	PTGNN	50	dep	0.8713 (0.0341)	0.6151 (0.0115)	0.6526 (0.0122)	0.2895 (0.0076)	0.3005 (0.0088)	0.318 (0.0086)	0.3538 (0.0096)	0.3846 (0.0071)	0.4299 (0.0068)	0.3548 (0.0093)	0.3849 (0.007)	0.43 (0.0068)	0.2643 (0.013)	0.2654 (0.0118)	0.2615 (0.0106)
CV2	PTGNN	50	dep	0.7064 (0.1004)	0.2742 (0.0592)	0.357 (0.0374)	0.14 (0.0231)	0.1472 (0.0258)	0.1534 (0.0275)	0.1694 (0.0416)	0.1849 (0.0466)	0.1985 (0.0519)	0.1719 (0.0413)	0.1857 (0.0465)	0.1987 (0.0519)	0.116 (0.0217)	0.1163 (0.0214)	0.1139 (0.0189)
CV3	PTGNN	50	dep	0.5668 (0.0207)	0.0581 (0.019)	0.1003 (0.0275)	0.0101 (0.0091)	0.0164 (0.0133)	0.0225 (0.0154)	0.0248 (0.0248)	0.0438 (0.0397)	0.0603 (0.0495)	0.0249 (0.0249)	0.0438 (0.0397)	0.0603 (0.0495)	0.0041 (0.0032)	0.0059 (0.0043)	0.0069 (0.0046)

## Sheet: PiLSL
Strategy	Model	neg/pos	NSM	AUROC	F1	AUPR	NDCG@10	NDCG@20	NDCG@50	Recall@10	Recall@20	Recall@50	Precision@10	Precision@20	Precision@50	MAP@10	MAP@20	MAP@50
CV1	PiLSL	1	random	0.9269 (0.0037)	0.9338 (0.0039)	0.8632 (0.0046)	0.5166 (0.009)	0.5169 (0.0091)	0.5175 (0.0092)	0.397 (0.0123)	0.4002 (0.0122)	0.4021 (0.0121)	0.4098 (0.0121)	0.4049 (0.0121)	0.4035 (0.0121)	0.5153 (0.0092)	0.5152 (0.0091)	0.5149 (0.0092)
CV2	PiLSL	1	random	0.7888 (0.0246)	0.817 (0.021)	0.7231 (0.0196)	0.3283 (0.0421)	0.3288 (0.0422)	0.3296 (0.0425)	0.2014 (0.0281)	0.2052 (0.0283)	0.2072 (0.0287)	0.2215 (0.0302)	0.2124 (0.029)	0.2089 (0.0288)	0.3263 (0.0423)	0.3261 (0.0423)	0.3257 (0.0422)
CV3	PiLSL	1	random	0.6259 (0.0296)	0.6296 (0.0307)	0.6696 (0.0042)	0.146 (0.0852)	0.1465 (0.0851)	0.1475 (0.0851)	0.0874 (0.0655)	0.0876 (0.0655)	0.0881 (0.0658)	0.0906 (0.0664)	0.0885 (0.0655)	0.0883 (0.0657)	0.1457 (0.0849)	0.1456 (0.0849)	0.1455 (0.0848)
CV1	PiLSL	5	random	0.9443 (0.0019)	0.8738 (0.0051)	0.8265 (0.0049)	0.4347 (0.0146)	0.4356 (0.0148)	0.4364 (0.0149)	0.3266 (0.0171)	0.3303 (0.0174)	0.3323 (0.0174)	0.3387 (0.0169)	0.3348 (0.0173)	0.3336 (0.0174)	0.4308 (0.0137)	0.4305 (0.0136)	0.4302 (0.0136)
CV2	PiLSL	5	random	0.7594 (0.0248)	0.5393 (0.0295)	0.4856 (0.0209)	0.1929 (0.0172)	0.1938 (0.0172)	0.195 (0.0176)	0.1109 (0.0115)	0.1122 (0.0114)	0.1135 (0.0116)	0.1195 (0.0111)	0.1156 (0.0114)	0.1147 (0.0118)	0.1913 (0.0174)	0.1913 (0.0174)	0.191 (0.0174)
CV3	PiLSL	5	random	0.6542 (0.0284)	0.2876 (0.0274)	0.3518 (0.0186)	0.0062 (0.0048)	0.0067 (0.0046)	0.0079 (0.0044)	0.0036 (0.0025)	0.0037 (0.0026)	0.0041 (0.0026)	0.0036 (0.0025)	0.0037 (0.0027)	0.0042 (0.0026)	0.0062 (0.005)	0.0062 (0.005)	0.0062 (0.005)
CV1	PiLSL	20	random	0.9485 (0.0015)	0.7559 (0.0068)	0.748 (0.0019)	0.3603 (0.0084)	0.363 (0.0085)	0.3644 (0.0087)	0.271 (0.011)	0.2758 (0.0113)	0.2781 (0.0114)	0.2803 (0.0109)	0.2793 (0.0113)	0.2791 (0.0114)	0.3534 (0.0085)	0.3527 (0.0083)	0.3524 (0.0083)
CV2	PiLSL	20	random	0.8086 (0.0276)	0.3895 (0.0462)	0.4017 (0.0373)	0.1478 (0.0263)	0.1488 (0.0264)	0.1502 (0.0268)	0.0874 (0.0164)	0.0879 (0.0162)	0.089 (0.0166)	0.0905 (0.0163)	0.0894 (0.0163)	0.0897 (0.0167)	0.1481 (0.026)	0.1483 (0.026)	0.1481 (0.026)
CV3	PiLSL	20	random	0.6754 (0.0275)	0.1129 (0.0243)	0.1797 (0.0298)	0.0017 (0.0016)	0.0021 (0.0018)	0.0033 (0.0024)	0.0016 (0.0023)	0.0016 (0.0023)	0.0021 (0.0022)	0.0017 (0.0023)	0.0016 (0.0023)	0.0021 (0.0022)	0.0016 (0.0019)	0.0016 (0.0019)	0.0017 (0.0019)
CV1	PiLSL	1	exp	0.9845 (0.0019)	0.9857 (0.0016)	0.949 (0.003)	0.5943 (0.0017)	0.5945 (0.0016)	0.595 (0.0016)	0.4758 (0.0027)	0.4789 (0.0028)	0.4809 (0.0027)	0.4887 (0.0026)	0.4836 (0.0027)	0.4822 (0.0027)	0.5952 (0.0016)	0.5951 (0.0017)	0.5948 (0.0017)
CV2	PiLSL	1	exp	0.8933 (0.0131)	0.8994 (0.0131)	0.8158 (0.0125)	0.547 (0.0322)	0.5476 (0.0324)	0.5484 (0.0327)	0.4165 (0.0182)	0.4229 (0.0191)	0.4261 (0.0198)	0.4395 (0.0206)	0.4316 (0.0199)	0.4284 (0.02)	0.5436 (0.0329)	0.5433 (0.0328)	0.5427 (0.0328)
CV3	PiLSL	1	exp	0.5729 (0.0444)	0.6029 (0.0425)	0.6888 (0.0243)	0.5051 (0.0988)	0.5065 (0.0993)	0.5074 (0.0994)	0.4103 (0.0991)	0.4155 (0.1005)	0.4174 (0.1002)	0.4219 (0.0991)	0.4198 (0.1003)	0.4183 (0.0998)	0.4983 (0.0985)	0.4979 (0.0982)	0.4976 (0.0984)
CV1	PiLSL	5	exp	0.9953 (0.0004)	0.9855 (0.0002)	0.9492 (0.0008)	0.5942 (0.0064)	0.5945 (0.0064)	0.595 (0.0063)	0.4734 (0.0068)	0.4764 (0.0069)	0.4786 (0.0069)	0.4862 (0.0069)	0.4812 (0.007)	0.4799 (0.0069)	0.5954 (0.006)	0.5953 (0.0061)	0.595 (0.0062)
CV2	PiLSL	5	exp	0.9101 (0.006)	0.7854 (0.0134)	0.7085 (0.0156)	0.4717 (0.0314)	0.473 (0.0314)	0.4741 (0.0316)	0.3494 (0.0294)	0.3566 (0.0296)	0.3602 (0.0298)	0.3716 (0.0298)	0.365 (0.0299)	0.3625 (0.0298)	0.4673 (0.0308)	0.4666 (0.0308)	0.466 (0.0308)
CV3	PiLSL	5	exp	0.6056 (0.0358)	0.2664 (0.0259)	0.3416 (0.033)	0.4376 (0.1032)	0.4414 (0.1043)	0.4438 (0.1043)	0.3687 (0.1202)	0.3785 (0.1248)	0.3843 (0.1272)	0.3785 (0.1213)	0.382 (0.125)	0.3854 (0.1273)	0.4246 (0.0993)	0.4242 (0.0996)	0.4239 (0.0996)
CV1	PiLSL	20	exp	0.9895 (0.0009)	0.9379 (0.0032)	0.8809 (0.0036)	0.516 (0.0137)	0.5163 (0.0137)	0.517 (0.0138)	0.3939 (0.0143)	0.3967 (0.0144)	0.3988 (0.0146)	0.4062 (0.0144)	0.4013 (0.0144)	0.4001 (0.0146)	0.5159 (0.0134)	0.5156 (0.0134)	0.5153 (0.0134)
CV2	PiLSL	20	exp	0.8919 (0.0097)	0.5614 (0.0252)	0.5334 (0.0189)	0.3389 (0.032)	0.3412 (0.0324)	0.3429 (0.0328)	0.2332 (0.0248)	0.2402 (0.0258)	0.2442 (0.0266)	0.2531 (0.0268)	0.2478 (0.0266)	0.2461 (0.0269)	0.3333 (0.0306)	0.3325 (0.0307)	0.3317 (0.0306)
CV3	PiLSL	20	exp	0.6139 (0.0524)	0.0805 (0.0215)	0.1396 (0.0281)	0.1451 (0.041)	0.1479 (0.0427)	0.1499 (0.0438)	0.0964 (0.0308)	0.1008 (0.0341)	0.1041 (0.0364)	0.1011 (0.0328)	0.1025 (0.0344)	0.1044 (0.0364)	0.1384 (0.0381)	0.1383 (0.0378)	0.138 (0.038)
CV1	PiLSL	1	dep	0.9815 (0.0014)	0.9817 (0.0014)	0.9416 (0.0013)	0.5937 (0.0076)	0.594 (0.0077)	0.5946 (0.0077)	0.4743 (0.008)	0.4774 (0.008)	0.4794 (0.0082)	0.4871 (0.0078)	0.4822 (0.0079)	0.4808 (0.0081)	0.5942 (0.0076)	0.594 (0.0076)	0.5937 (0.0074)
CV2	PiLSL	1	dep	0.9081 (0.0132)	0.9185 (0.0099)	0.8391 (0.011)	0.5076 (0.0404)	0.5085 (0.0405)	0.5093 (0.0407)	0.3731 (0.0251)	0.379 (0.0253)	0.3819 (0.0258)	0.3956 (0.0266)	0.3877 (0.0258)	0.3842 (0.026)	0.5057 (0.0408)	0.5052 (0.0409)	0.5047 (0.0409)
CV3	PiLSL	1	dep	0.5748 (0.0214)	0.585 (0.0429)	0.682 (0.0267)	0.3742 (0.1926)	0.3752 (0.1932)	0.3762 (0.1936)	0.2779 (0.1963)	0.2805 (0.1985)	0.2819 (0.2)	0.2873 (0.1992)	0.284 (0.1987)	0.2827 (0.1999)	0.3708 (0.1892)	0.3702 (0.189)	0.37 (0.189)
CV1	PiLSL	5	dep	0.9742 (0.0005)	0.9263 (0.0013)	0.8607 (0.0041)	0.5004 (0.0102)	0.501 (0.0103)	0.5018 (0.0104)	0.385 (0.013)	0.3882 (0.0132)	0.3903 (0.0132)	0.3971 (0.0132)	0.3928 (0.0133)	0.3917 (0.0132)	0.4981 (0.0094)	0.4977 (0.0093)	0.4974 (0.0093)
CV2	PiLSL	5	dep	0.8871 (0.0189)	0.7386 (0.0331)	0.6585 (0.0311)	0.3317 (0.0484)	0.3332 (0.0485)	0.3344 (0.0488)	0.2189 (0.0329)	0.2243 (0.0337)	0.2269 (0.0341)	0.2388 (0.0357)	0.2319 (0.0347)	0.2288 (0.0343)	0.3277 (0.0473)	0.3273 (0.0472)	0.3269 (0.0472)
CV3	PiLSL	5	dep	0.5846 (0.0532)	0.2539 (0.0487)	0.3272 (0.0362)	0.087 (0.0318)	0.0877 (0.0318)	0.0887 (0.0314)	0.0458 (0.0168)	0.0464 (0.0171)	0.047 (0.0172)	0.0485 (0.0176)	0.0474 (0.0174)	0.0472 (0.0172)	0.0857 (0.0317)	0.0856 (0.0315)	0.0854 (0.0314)
CV1	PiLSL	20	dep	0.9613 (0.0007)	0.7911 (0.0035)	0.7472 (0.0045)	0.3684 (0.005)	0.3699 (0.0049)	0.3712 (0.0048)	0.269 (0.0056)	0.272 (0.0055)	0.2742 (0.0055)	0.2787 (0.0056)	0.2757 (0.0055)	0.2753 (0.0055)	0.3639 (0.005)	0.3635 (0.0051)	0.3631 (0.0051)
CV2	PiLSL	20	dep	0.8424 (0.018)	0.4502 (0.038)	0.4488 (0.0312)	0.1638 (0.0376)	0.165 (0.0377)	0.1665 (0.0381)	0.093 (0.0213)	0.094 (0.0214)	0.0954 (0.0219)	0.0994 (0.0233)	0.0964 (0.0219)	0.0962 (0.022)	0.1638 (0.0368)	0.164 (0.0368)	0.1637 (0.0368)
CV3	PiLSL	20	dep	0.6368 (0.0161)	0.0907 (0.0133)	0.1542 (0.015)	0.0027 (0.0013)	0.0032 (0.0012)	0.0043 (0.0014)	0.0023 (0.0019)	0.0024 (0.0021)	0.0029 (0.0019)	0.0023 (0.0019)	0.0025 (0.0021)	0.0029 (0.002)	0.0026 (0.0015)	0.0026 (0.0015)	0.0027 (0.0015)

## Sheet: NSF4SL
Strategy	Model	neg/pos	NSM	AUROC	F1	AUPR	NDCG@10	NDCG@20	NDCG@50	Recall@10	Recall@20	Recall@50	Precision@10	Precision@20	Precision@50	MAP@10	MAP@20	MAP@50
CV1	NSF4SL	1	random	0.9319 (0.0045)	0.9453 (0.0036)	0.8691 (0.0051)	0.2279 (0.0146)	0.2507 (0.0156)	0.2706 (0.0148)	0.3526 (0.01)	0.4108 (0.0104)	0.4624 (0.0097)	0.3563 (0.01)	0.4126 (0.0104)	0.4626 (0.0097)	0.1881 (0.0194)	0.1857 (0.0184)	0.1818 (0.0183)
CV2	NSF4SL	1	random	0.7703 (0.031)	0.7988 (0.0238)	0.7093 (0.0206)	0.1043 (0.0179)	0.1182 (0.0201)	0.1353 (0.0209)	0.1491 (0.0319)	0.1798 (0.0396)	0.2345 (0.0678)	0.1521 (0.0317)	0.1812 (0.0395)	0.235 (0.0678)	0.0811 (0.0188)	0.0824 (0.0176)	0.0807 (0.0143)
CV3	NSF4SL	1	random	0.6834 (0.0524)	0.6953 (0.0539)	0.6851 (0.0137)	0.0041 (0.0037)	0.0058 (0.0033)	0.0123 (0.0085)	0.0033 (0.0028)	0.0082 (0.0067)	0.028 (0.0354)	0.0034 (0.0029)	0.0082 (0.0066)	0.028 (0.0354)	0.0028 (0.0028)	0.0033 (0.0026)	0.004 (0.0022)
CV1	NSF4SL	5	random	0.9321 (0.0037)	0.849 (0.0059)	0.8021 (0.0042)	0.2279 (0.0146)	0.2507 (0.0156)	0.2706 (0.0148)	0.3526 (0.01)	0.4108 (0.0104)	0.4624 (0.0097)	0.3563 (0.01)	0.4126 (0.0104)	0.4626 (0.0097)	0.1881 (0.0194)	0.1857 (0.0184)	0.1818 (0.0183)
CV2	NSF4SL	5	random	0.7665 (0.0319)	0.5339 (0.0384)	0.4942 (0.0313)	0.1043 (0.0179)	0.1182 (0.0201)	0.1353 (0.0209)	0.1491 (0.0319)	0.1798 (0.0396)	0.2345 (0.0678)	0.1521 (0.0317)	0.1812 (0.0395)	0.235 (0.0678)	0.0811 (0.0188)	0.0824 (0.0176)	0.0807 (0.0143)
CV3	NSF4SL	5	random	0.6941 (0.0434)	0.367 (0.0726)	0.4029 (0.0483)	0.0041 (0.0037)	0.0058 (0.0033)	0.0123 (0.0085)	0.0033 (0.0028)	0.0082 (0.0067)	0.028 (0.0354)	0.0034 (0.0029)	0.0082 (0.0066)	0.028 (0.0354)	0.0028 (0.0028)	0.0033 (0.0026)	0.004 (0.0022)
CV1	NSF4SL	20	random	0.932 (0.0038)	0.7021 (0.0106)	0.7037 (0.011)	0.2279 (0.0146)	0.2507 (0.0156)	0.2706 (0.0148)	0.3526 (0.01)	0.4108 (0.0104)	0.4624 (0.0097)	0.3563 (0.01)	0.4126 (0.0104)	0.4626 (0.0097)	0.1881 (0.0194)	0.1857 (0.0184)	0.1818 (0.0183)
CV2	NSF4SL	20	random	0.7651 (0.0304)	0.3139 (0.0356)	0.355 (0.0329)	0.1043 (0.0179)	0.1182 (0.0201)	0.1353 (0.0209)	0.1491 (0.0319)	0.1798 (0.0396)	0.2345 (0.0678)	0.1521 (0.0317)	0.1812 (0.0395)	0.235 (0.0678)	0.0811 (0.0188)	0.0824 (0.0176)	0.0807 (0.0143)
CV3	NSF4SL	20	random	0.6913 (0.0443)	0.1542 (0.0353)	0.2232 (0.0467)	0.0041 (0.0037)	0.0058 (0.0033)	0.0123 (0.0085)	0.0033 (0.0028)	0.0082 (0.0067)	0.028 (0.0354)	0.0034 (0.0029)	0.0082 (0.0066)	0.028 (0.0354)	0.0028 (0.0028)	0.0033 (0.0026)	0.004 (0.0022)
CV1	NSF4SL	50	random	0.9321 (0.0039)	0.5657 (0.0147)	0.6048 (0.0153)	0.2279 (0.0146)	0.2507 (0.0156)	0.2706 (0.0148)	0.3526 (0.01)	0.4108 (0.0104)	0.4624 (0.0097)	0.3563 (0.01)	0.4126 (0.0104)	0.4626 (0.0097)	0.1881 (0.0194)	0.1857 (0.0184)	0.1818 (0.0183)
CV2	NSF4SL	50	random	0.765 (0.0303)	0.2006 (0.0307)	0.2747 (0.0332)	0.1043 (0.0179)	0.1182 (0.0201)	0.1353 (0.0209)	0.1491 (0.0319)	0.1798 (0.0396)	0.2345 (0.0678)	0.1521 (0.0317)	0.1812 (0.0395)	0.235 (0.0678)	0.0811 (0.0188)	0.0824 (0.0176)	0.0807 (0.0143)
CV3	NSF4SL	50	random	0.6946 (0.0412)	0.0758 (0.0171)	0.1437 (0.0342)	0.0041 (0.0037)	0.0058 (0.0033)	0.0123 (0.0085)	0.0033 (0.0028)	0.0082 (0.0067)	0.028 (0.0354)	0.0034 (0.0029)	0.0082 (0.0066)	0.028 (0.0354)	0.0028 (0.0028)	0.0033 (0.0026)	0.004 (0.0022)
CV1	NSF4SL	1	exp	0.9165 (0.0048)	0.936 (0.0039)	0.8614 (0.004)	0.2432 (0.0188)	0.2644 (0.0192)	0.2839 (0.0186)	0.3574 (0.0068)	0.4125 (0.0076)	0.4625 (0.0061)	0.3612 (0.0068)	0.4141 (0.0076)	0.4627 (0.0061)	0.2063 (0.0237)	0.2038 (0.0234)	0.1995 (0.0231)
CV2	NSF4SL	1	exp	0.7368 (0.0476)	0.7722 (0.0522)	0.7001 (0.0137)	0.0995 (0.0145)	0.1148 (0.0126)	0.1244 (0.0129)	0.1347 (0.0224)	0.176 (0.0319)	0.1971 (0.0368)	0.1377 (0.0227)	0.1775 (0.0319)	0.1976 (0.0368)	0.0785 (0.0128)	0.0796 (0.0105)	0.0775 (0.0096)
CV3	NSF4SL	1	exp	0.691 (0.0533)	0.7248 (0.0639)	0.7023 (0.0291)	0.0035 (0.0035)	0.0079 (0.0043)	0.0123 (0.0072)	0.0022 (0.0023)	0.0133 (0.0141)	0.0259 (0.0297)	0.0024 (0.0024)	0.0134 (0.0141)	0.0259 (0.0297)	0.0026 (0.0028)	0.0036 (0.0023)	0.0042 (0.0023)
CV1	NSF4SL	5	exp	0.9152 (0.005)	0.8271 (0.0124)	0.7908 (0.0122)	0.2432 (0.0188)	0.2644 (0.0192)	0.2839 (0.0186)	0.3574 (0.0068)	0.4125 (0.0076)	0.4625 (0.0061)	0.3612 (0.0068)	0.4141 (0.0076)	0.4627 (0.0061)	0.2063 (0.0237)	0.2038 (0.0234)	0.1995 (0.0231)
CV2	NSF4SL	5	exp	0.7578 (0.018)	0.5477 (0.0268)	0.5087 (0.0244)	0.1008 (0.0199)	0.1154 (0.0192)	0.126 (0.0192)	0.133 (0.0242)	0.1721 (0.0288)	0.1963 (0.0383)	0.1361 (0.0245)	0.1736 (0.0288)	0.1969 (0.0383)	0.0812 (0.0203)	0.0815 (0.0171)	0.0792 (0.016)
CV3	NSF4SL	5	exp	0.6798 (0.032)	0.4081 (0.0479)	0.4031 (0.045)	0.0048 (0.0042)	0.0056 (0.0039)	0.007 (0.0042)	0.0036 (0.0028)	0.0043 (0.0032)	0.0063 (0.0044)	0.0037 (0.0028)	0.0044 (0.0031)	0.0063 (0.0044)	0.0032 (0.003)	0.0034 (0.0028)	0.0036 (0.0028)
CV1	NSF4SL	20	exp	0.9232 (0.0031)	0.6997 (0.028)	0.7024 (0.0258)	0.2437 (0.0114)	0.2658 (0.0116)	0.2849 (0.0099)	0.3565 (0.0108)	0.4133 (0.0123)	0.4621 (0.0059)	0.3603 (0.0107)	0.415 (0.0122)	0.4623 (0.0059)	0.2069 (0.0118)	0.2048 (0.0112)	0.2007 (0.0109)
CV2	NSF4SL	20	exp	0.7587 (0.0097)	0.3341 (0.0085)	0.3712 (0.0094)	0.1059 (0.0132)	0.1203 (0.0151)	0.1292 (0.0152)	0.1495 (0.0247)	0.1838 (0.0382)	0.2005 (0.0378)	0.1526 (0.0247)	0.1852 (0.0381)	0.2011 (0.0377)	0.0821 (0.0134)	0.0826 (0.0114)	0.0804 (0.0103)
CV3	NSF4SL	20	exp	0.6933 (0.0213)	0.1875 (0.0263)	0.2479 (0.0288)	0.0035 (0.0026)	0.0048 (0.0028)	0.0067 (0.0028)	0.0029 (0.0025)	0.0044 (0.003)	0.0076 (0.0036)	0.0031 (0.0025)	0.0045 (0.003)	0.0077 (0.0036)	0.0022 (0.0017)	0.0026 (0.0017)	0.0029 (0.0018)
CV1	NSF4SL	50	exp	0.9272 (0.0036)	0.5947 (0.0157)	0.6297 (0.0177)	0.2397 (0.0137)	0.2624 (0.013)	0.282 (0.0129)	0.352 (0.0082)	0.4113 (0.0052)	0.4616 (0.0038)	0.3559 (0.0082)	0.4131 (0.0052)	0.4618 (0.0038)	0.2035 (0.017)	0.2014 (0.0164)	0.1982 (0.0163)
CV2	NSF4SL	50	exp	0.7597 (0.0232)	0.2272 (0.0195)	0.2986 (0.0243)	0.1008 (0.0139)	0.1164 (0.0148)	0.1316 (0.0148)	0.1412 (0.0193)	0.1815 (0.036)	0.2295 (0.0498)	0.1444 (0.0195)	0.1829 (0.0359)	0.23 (0.0497)	0.0795 (0.0167)	0.079 (0.0115)	0.0776 (0.01)
CV3	NSF4SL	50	exp	0.6876 (0.0439)	0.0929 (0.0195)	0.1602 (0.0276)	0.003 (0.0041)	0.0043 (0.0037)	0.0111 (0.0103)	0.0023 (0.0025)	0.0036 (0.0026)	0.0313 (0.0487)	0.0024 (0.0025)	0.0036 (0.0026)	0.0313 (0.0487)	0.0018 (0.0027)	0.0022 (0.0025)	0.0032 (0.0024)
CV1	NSF4SL	1	dep	0.8925 (0.0044)	0.9017 (0.0047)	0.825 (0.0034)	0.2432 (0.0188)	0.2644 (0.0192)	0.2839 (0.0186)	0.3574 (0.0068)	0.4125 (0.0076)	0.4625 (0.0061)	0.3612 (0.0068)	0.4141 (0.0076)	0.4627 (0.0061)	0.2063 (0.0237)	0.2038 (0.0234)	0.1995 (0.0231)
CV2	NSF4SL	1	dep	0.6948 (0.0135)	0.7264 (0.0124)	0.6825 (0.0078)	0.0995 (0.0145)	0.1148 (0.0126)	0.1244 (0.0129)	0.1347 (0.0224)	0.176 (0.0319)	0.1971 (0.0368)	0.1377 (0.0227)	0.1775 (0.0319)	0.1976 (0.0368)	0.0785 (0.0128)	0.0796 (0.0105)	0.0775 (0.0096)
CV3	NSF4SL	1	dep	0.5638 (0.0513)	0.5883 (0.0438)	0.6834 (0.0262)	0.0035 (0.0035)	0.0079 (0.0043)	0.0123 (0.0072)	0.0022 (0.0023)	0.0133 (0.0141)	0.0259 (0.0297)	0.0024 (0.0024)	0.0134 (0.0141)	0.0259 (0.0297)	0.0026 (0.0028)	0.0036 (0.0023)	0.0042 (0.0023)
CV1	NSF4SL	5	dep	0.9046 (0.0022)	0.7503 (0.0083)	0.7185 (0.0099)	0.2437 (0.0114)	0.2658 (0.0116)	0.2849 (0.0099)	0.3565 (0.0108)	0.4133 (0.0123)	0.4621 (0.0059)	0.3603 (0.0107)	0.415 (0.0122)	0.4623 (0.0059)	0.2069 (0.0118)	0.2048 (0.0112)	0.2007 (0.0109)
CV2	NSF4SL	5	dep	0.7268 (0.0167)	0.4559 (0.0281)	0.4443 (0.0177)	0.1008 (0.0199)	0.1154 (0.0192)	0.126 (0.0192)	0.133 (0.0242)	0.1721 (0.0288)	0.1963 (0.0383)	0.1361 (0.0245)	0.1736 (0.0288)	0.1969 (0.0383)	0.0812 (0.0203)	0.0815 (0.0171)	0.0792 (0.016)
CV3	NSF4SL	5	dep	0.6242 (0.0396)	0.2974 (0.0514)	0.3518 (0.0479)	0.0048 (0.0042)	0.0056 (0.0039)	0.007 (0.0042)	0.0036 (0.0028)	0.0043 (0.0032)	0.0063 (0.0044)	0.0037 (0.0028)	0.0044 (0.0031)	0.0063 (0.0044)	0.0032 (0.003)	0.0034 (0.0028)	0.0036 (0.0028)
CV1	NSF4SL	20	dep	0.9191 (0.0045)	0.6006 (0.0152)	0.6198 (0.0139)	0.2397 (0.0137)	0.2624 (0.013)	0.282 (0.0129)	0.352 (0.0082)	0.4113 (0.0052)	0.4616 (0.0038)	0.3559 (0.0082)	0.4131 (0.0052)	0.4618 (0.0038)	0.2035 (0.017)	0.2014 (0.0164)	0.1982 (0.0163)
CV2	NSF4SL	20	dep	0.7502 (0.0127)	0.2793 (0.0097)	0.3279 (0.007)	0.1059 (0.0132)	0.1203 (0.0151)	0.1292 (0.0152)	0.1495 (0.0247)	0.1838 (0.0382)	0.2005 (0.0378)	0.1526 (0.0247)	0.1852 (0.0381)	0.2011 (0.0377)	0.0821 (0.0134)	0.0826 (0.0114)	0.0804 (0.0103)
CV3	NSF4SL	20	dep	0.6688 (0.0434)	0.136 (0.0344)	0.2055 (0.0428)	0.0035 (0.0026)	0.0048 (0.0028)	0.0067 (0.0028)	0.0029 (0.0025)	0.0044 (0.003)	0.0076 (0.0036)	0.0031 (0.0025)	0.0045 (0.003)	0.0077 (0.0036)	0.0022 (0.0017)	0.0026 (0.0017)	0.0029 (0.0018)
CV1	NSF4SL	50	dep	0.921 (0.0025)	0.4721 (0.0246)	0.5166 (0.0262)	0.2432 (0.0188)	0.2644 (0.0192)	0.2839 (0.0186)	0.3574 (0.0068)	0.4125 (0.0076)	0.4625 (0.0061)	0.3612 (0.0068)	0.4141 (0.0076)	0.4627 (0.0061)	0.2063 (0.0237)	0.2038 (0.0234)	0.1995 (0.0231)
CV2	NSF4SL	50	dep	0.7564 (0.025)	0.1778 (0.02)	0.2547 (0.0236)	0.1008 (0.0139)	0.1164 (0.0148)	0.1316 (0.0148)	0.1412 (0.0193)	0.1815 (0.036)	0.2295 (0.0498)	0.1444 (0.0195)	0.1829 (0.0359)	0.23 (0.0497)	0.0795 (0.0167)	0.079 (0.0115)	0.0776 (0.01)
CV3	NSF4SL	50	dep	0.6749 (0.0452)	0.0709 (0.0169)	0.1359 (0.0276)	0.003 (0.0041)	0.0043 (0.0037)	0.0111 (0.0103)	0.0023 (0.0025)	0.0036 (0.0026)	0.0313 (0.0487)	0.0024 (0.0025)	0.0036 (0.0026)	0.0313 (0.0487)	0.0018 (0.0027)	0.0022 (0.0025)	0.0032 (0.0024)

## Sheet: MGE4SL
Strategy	Model	neg/pos	NSM	AUROC	F1	AUPR	NDCG@10	NDCG@20	NDCG@50	Recall@10	Recall@20	Recall@50	Precision@10	Precision@20	Precision@50	MAP@10	MAP@20	MAP@50
CV1	MGE4SL	1	random	0.7048 (0.0189)	0.6681 (0.0251)	0.6971 (0.0062)	0.0028 (0.0002)	0.0043 (0.0003)	0.0071 (0.001)	0.002 (0.0005)	0.0039 (0.0006)	0.0085 (0.002)	0.0022 (0.0004)	0.004 (0.0006)	0.0085 (0.002)	0.0018 (0.0004)	0.0022 (0.0005)	0.0024 (0.0005)
CV2	MGE4SL	1	random	0.5805 (0.0244)	0.5579 (0.0125)	0.67 (0.0042)	0.0039 (0.0021)	0.0055 (0.002)	0.0084 (0.0022)	0.0034 (0.0022)	0.0063 (0.0051)	0.0122 (0.0111)	0.0037 (0.0022)	0.0065 (0.0051)	0.0122 (0.011)	0.0033 (0.0008)	0.0039 (0.001)	0.0043 (0.001)
CV3	MGE4SL	1	random	0.5297 (0.053)	0.5493 (0.0595)	0.6684 (0.0012)	0.0044 (0.0031)	0.0066 (0.0049)	0.0113 (0.0094)	0.0024 (0.0021)	0.0074 (0.0075)	0.0205 (0.02)	0.0027 (0.0019)	0.0075 (0.0074)	0.0205 (0.02)	0.0013 (0.0004)	0.0019 (0.0007)	0.0025 (0.0011)
CV1	MGE4SL	5	random	0.6241 (0.02)	0.261 (0.0637)	0.3352 (0.0092)	0.0421 (0.0459)	0.0455 (0.0488)	0.0499 (0.0527)	0.049 (0.0564)	0.0559 (0.064)	0.0646 (0.0729)	0.0494 (0.0567)	0.056 (0.064)	0.0647 (0.0729)	0.0348 (0.0375)	0.0355 (0.0381)	0.0357 (0.0382)
CV2	MGE4SL	5	random	0.6089 (0.0155)	0.2628 (0.052)	0.3349 (0.0259)	0.0237 (0.0374)	0.0252 (0.0376)	0.0276 (0.0377)	0.0205 (0.0353)	0.0218 (0.0358)	0.0246 (0.0365)	0.0212 (0.036)	0.0221 (0.036)	0.0247 (0.0365)	0.0197 (0.0314)	0.02 (0.0312)	0.0202 (0.0311)
CV3	MGE4SL	5	random	0.5473 (0.0363)	0.1874 (0.0208)	0.3088 (0.0237)	0.0015 (0.0005)	0.0032 (0.0021)	0.0044 (0.0024)	0.0012 (0.001)	0.0032 (0.0025)	0.005 (0.0027)	0.0013 (0.001)	0.0033 (0.0025)	0.005 (0.0028)	0.0009 (0.0004)	0.0014 (0.0007)	0.0016 (0.0008)
CV1	MGE4SL	20	random	0.335 (0.136)	0.0366 (0.0129)	0.0976 (0.0134)	0.0141 (0.0246)	0.0155 (0.0268)	0.0174 (0.0283)	0.017 (0.0317)	0.0194 (0.036)	0.0225 (0.0392)	0.0172 (0.0318)	0.0195 (0.036)	0.0225 (0.0392)	0.0107 (0.0185)	0.0111 (0.0191)	0.0112 (0.0192)
CV2	MGE4SL	20	random	0.4491 (0.0597)	0.0458 (0.0079)	0.1 (0.0126)	0.0049 (0.0062)	0.0056 (0.0065)	0.0068 (0.007)	0.0022 (0.003)	0.003 (0.0037)	0.0042 (0.0045)	0.0026 (0.0032)	0.0032 (0.0037)	0.0042 (0.0045)	0.0044 (0.0057)	0.0045 (0.0057)	0.0045 (0.0055)
CV3	MGE4SL	20	random	0.5145 (0.0556)	0.054 (0.0116)	0.1173 (0.034)	0.0015 (0.0017)	0.0039 (0.0036)	0.0066 (0.0079)	0.0011 (0.002)	0.0054 (0.0063)	0.0145 (0.0226)	0.0012 (0.002)	0.0054 (0.0063)	0.0145 (0.0226)	0.0012 (0.0014)	0.0019 (0.0018)	0.0023 (0.0024)
CV1	MGE4SL	50	random	0.2887 (0.0469)	0.0127 (0.001)	0.0385 (0.0001)	0.0027 (0.0028)	0.0032 (0.0031)	0.0049 (0.004)	0.0018 (0.0028)	0.0025 (0.0034)	0.0046 (0.0048)	0.0019 (0.0029)	0.0026 (0.0035)	0.0046 (0.0048)	0.0023 (0.0024)	0.0024 (0.0024)	0.0025 (0.0025)
CV2	MGE4SL	50	random	0.3781 (0.0424)	0.0153 (0.0015)	0.0386 (0.0002)	0.0011 (0.0006)	0.0018 (0.0013)	0.0031 (0.002)	0.0005 (0.0005)	0.001 (0.0011)	0.0018 (0.0017)	0.0006 (0.0005)	0.0011 (0.0012)	0.0018 (0.0017)	0.001 (0.0005)	0.0012 (0.0007)	0.0013 (0.0007)
CV3	MGE4SL	50	random	0.5158 (0.056)	0.0219 (0.0041)	0.0521 (0.0158)	0.0002 (0.0004)	0.0017 (0.0028)	0.0018 (0.0029)	0.0 (0.0001)	0.0018 (0.0031)	0.0023 (0.0035)	0.0001 (0.0001)	0.0018 (0.0031)	0.0023 (0.0035)	0.0002 (0.0004)	0.0007 (0.001)	0.0007 (0.001)
CV1	MGE4SL	1	exp	0.7103 (0.0209)	0.6941 (0.029)	0.6901 (0.0065)	0.0026 (0.0001)	0.0039 (0.0001)	0.0053 (0.0003)	0.0017 (0.0005)	0.0027 (0.0005)	0.005 (0.0007)	0.0018 (0.0005)	0.0028 (0.0005)	0.005 (0.0007)	0.0022 (0.0006)	0.0025 (0.0006)	0.0027 (0.0006)
CV2	MGE4SL	1	exp	0.5808 (0.0304)	0.5777 (0.0196)	0.6758 (0.0079)	0.0038 (0.0016)	0.0055 (0.0018)	0.0088 (0.0017)	0.0026 (0.0014)	0.0051 (0.004)	0.0108 (0.0056)	0.0029 (0.0014)	0.0052 (0.004)	0.0109 (0.0056)	0.0028 (0.0008)	0.0033 (0.0009)	0.0038 (0.0009)
CV3	MGE4SL	1	exp	0.529 (0.0553)	0.5631 (0.042)	0.6902 (0.0233)	0.0043 (0.0025)	0.0058 (0.0027)	0.0084 (0.0022)	0.0026 (0.0026)	0.0053 (0.0049)	0.0107 (0.0082)	0.0028 (0.0025)	0.0055 (0.0048)	0.0107 (0.0081)	0.0021 (0.0009)	0.0026 (0.0011)	0.003 (0.001)
CV1	MGE4SL	5	exp	0.6728 (0.0397)	0.3339 (0.1026)	0.3895 (0.0423)	0.0415 (0.077)	0.0431 (0.0777)	0.0448 (0.0786)	0.048 (0.0923)	0.0505 (0.0951)	0.0537 (0.0975)	0.0482 (0.0924)	0.0506 (0.0951)	0.0538 (0.0974)	0.0345 (0.0647)	0.0348 (0.0646)	0.035 (0.0646)
CV2	MGE4SL	5	exp	0.6158 (0.023)	0.2697 (0.0341)	0.3444 (0.0312)	0.0205 (0.0333)	0.0224 (0.0333)	0.0294 (0.0323)	0.016 (0.0278)	0.0175 (0.0284)	0.0354 (0.0357)	0.0166 (0.0283)	0.0178 (0.0285)	0.0355 (0.0357)	0.0212 (0.034)	0.0215 (0.0337)	0.0222 (0.0325)
CV3	MGE4SL	5	exp	0.5539 (0.0432)	0.2207 (0.0314)	0.3333 (0.0379)	0.0031 (0.002)	0.0044 (0.003)	0.0052 (0.0033)	0.0022 (0.0026)	0.003 (0.0024)	0.0049 (0.0027)	0.0024 (0.0027)	0.0031 (0.0024)	0.0049 (0.0027)	0.0034 (0.0039)	0.0035 (0.0039)	0.0037 (0.0039)
CV1	MGE4SL	20	exp	0.4826 (0.1961)	0.0806 (0.0745)	0.1631 (0.1225)	0.0019 (0.0012)	0.0027 (0.0011)	0.0038 (0.0013)	0.0008 (0.0004)	0.0014 (0.0008)	0.003 (0.0013)	0.0009 (0.0004)	0.0015 (0.0008)	0.003 (0.0013)	0.0017 (0.0011)	0.0019 (0.0011)	0.002 (0.0011)
CV2	MGE4SL	20	exp	0.4739 (0.0963)	0.0554 (0.0164)	0.1218 (0.0308)	0.0034 (0.0034)	0.004 (0.0036)	0.0054 (0.004)	0.0006 (0.0007)	0.0011 (0.0009)	0.0026 (0.0018)	0.0009 (0.0008)	0.0012 (0.0009)	0.0026 (0.0018)	0.0032 (0.0033)	0.0034 (0.0034)	0.0035 (0.0034)
CV3	MGE4SL	20	exp	0.5189 (0.062)	0.06 (0.0121)	0.1287 (0.0415)	0.0011 (0.001)	0.0027 (0.0024)	0.0031 (0.0026)	0.0008 (0.0014)	0.0031 (0.003)	0.0045 (0.0039)	0.0009 (0.0014)	0.0031 (0.003)	0.0045 (0.0039)	0.0007 (0.0006)	0.0013 (0.0008)	0.0013 (0.0009)
CV1	MGE4SL	50	exp	0.2745 (0.0411)	0.0124 (0.0007)	0.0385 (0.0)	0.0015 (0.0009)	0.0018 (0.0008)	0.003 (0.0009)	0.0005 (0.0003)	0.0009 (0.0002)	0.0023 (0.0006)	0.0006 (0.0003)	0.001 (0.0002)	0.0024 (0.0006)	0.0012 (0.0009)	0.0013 (0.0008)	0.0015 (0.0008)
CV2	MGE4SL	50	exp	0.3679 (0.0439)	0.0156 (0.0014)	0.0396 (0.0009)	0.0011 (0.0006)	0.0018 (0.0012)	0.0027 (0.0019)	0.0004 (0.0002)	0.0008 (0.0008)	0.0015 (0.0016)	0.0005 (0.0002)	0.0009 (0.0009)	0.0015 (0.0016)	0.0009 (0.0005)	0.001 (0.0007)	0.0011 (0.0008)
CV3	MGE4SL	50	exp	0.5086 (0.0691)	0.0231 (0.0043)	0.051 (0.0117)	0.0 (0.0)	0.0003 (0.0005)	0.0009 (0.0019)	0.0 (0.0)	0.0003 (0.0006)	0.0011 (0.0022)	0.0 (0.0)	0.0003 (0.0006)	0.0011 (0.0022)	0.0 (0.0)	0.0001 (0.0002)	0.0002 (0.0004)
CV1	MGE4SL	1	dep	0.7212 (0.0167)	0.6812 (0.0204)	0.7076 (0.0065)	0.0026 (0.0001)	0.0039 (0.0001)	0.0053 (0.0003)	0.0017 (0.0002)	0.0027 (0.0005)	0.005 (0.0007)	0.0019 (0.0003)	0.0028 (0.0005)	0.005 (0.0007)	0.0024 (0.0004)	0.0027 (0.0003)	0.0029 (0.0002)
CV2	MGE4SL	1	dep	0.6169 (0.039)	0.5962 (0.0397)	0.6774 (0.0137)	0.004 (0.0021)	0.0056 (0.0021)	0.0086 (0.0026)	0.0019 (0.0012)	0.0035 (0.0026)	0.0084 (0.0058)	0.0022 (0.0012)	0.0037 (0.0026)	0.0085 (0.0058)	0.0028 (0.0013)	0.0032 (0.0014)	0.0035 (0.0013)
CV3	MGE4SL	1	dep	0.533 (0.0654)	0.5483 (0.0624)	0.6827 (0.0263)	0.0046 (0.0031)	0.006 (0.003)	0.0086 (0.0028)	0.0028 (0.0026)	0.0051 (0.003)	0.0092 (0.0045)	0.003 (0.0026)	0.0052 (0.0029)	0.0093 (0.0045)	0.0032 (0.0024)	0.0036 (0.0023)	0.0039 (0.0021)
CV1	MGE4SL	5	dep	0.6678 (0.0361)	0.3041 (0.0829)	0.3755 (0.0309)	0.0263 (0.0473)	0.0281 (0.0481)	0.0302 (0.0495)	0.0282 (0.0522)	0.0308 (0.0559)	0.0362 (0.0618)	0.0284 (0.0523)	0.0309 (0.0558)	0.0362 (0.0618)	0.0224 (0.0407)	0.0226 (0.0407)	0.0229 (0.0408)
CV2	MGE4SL	5	dep	0.6051 (0.03)	0.2409 (0.0316)	0.3312 (0.0322)	0.0218 (0.0324)	0.0259 (0.0309)	0.0317 (0.0306)	0.0165 (0.0275)	0.024 (0.0267)	0.0385 (0.0363)	0.0171 (0.0279)	0.0243 (0.0268)	0.0386 (0.0364)	0.0211 (0.0339)	0.022 (0.0332)	0.0222 (0.0317)
CV3	MGE4SL	5	dep	0.5386 (0.0458)	0.2058 (0.0522)	0.326 (0.04)	0.0035 (0.0027)	0.0046 (0.0033)	0.0055 (0.0036)	0.0019 (0.0018)	0.0036 (0.0027)	0.0057 (0.0033)	0.0021 (0.0018)	0.0037 (0.0027)	0.0058 (0.0033)	0.0018 (0.0012)	0.0022 (0.0014)	0.0023 (0.0014)
CV1	MGE4SL	20	dep	0.4264 (0.2058)	0.0726 (0.0698)	0.1559 (0.1196)	0.0035 (0.004)	0.0045 (0.0042)	0.0054 (0.0045)	0.002 (0.0026)	0.0032 (0.0036)	0.0044 (0.0044)	0.0022 (0.0026)	0.0033 (0.0036)	0.0045 (0.0044)	0.003 (0.0037)	0.0032 (0.0037)	0.0033 (0.0037)
CV2	MGE4SL	20	dep	0.4878 (0.1021)	0.0583 (0.0199)	0.1154 (0.0201)	0.0142 (0.0247)	0.0155 (0.0263)	0.0173 (0.028)	0.0095 (0.0182)	0.012 (0.0227)	0.0152 (0.0274)	0.0098 (0.0183)	0.0122 (0.0227)	0.0153 (0.0274)	0.0132 (0.0232)	0.0136 (0.0236)	0.0137 (0.0237)
CV3	MGE4SL	20	dep	0.52 (0.0569)	0.0577 (0.0118)	0.1263 (0.0346)	0.0013 (0.0015)	0.0032 (0.0027)	0.004 (0.0035)	0.0008 (0.0014)	0.0038 (0.0037)	0.0062 (0.0066)	0.0009 (0.0014)	0.0038 (0.0037)	0.0062 (0.0066)	0.001 (0.001)	0.0016 (0.0012)	0.0017 (0.0014)
CV1	MGE4SL	50	dep	0.2648 (0.0358)	0.0122 (0.0006)	0.0385 (0.0)	0.0015 (0.0009)	0.0019 (0.0007)	0.0029 (0.0006)	0.0006 (0.0003)	0.001 (0.0004)	0.0024 (0.0004)	0.0007 (0.0003)	0.0011 (0.0004)	0.0024 (0.0004)	0.0013 (0.0008)	0.0014 (0.0008)	0.0015 (0.0008)
CV2	MGE4SL	50	dep	0.3658 (0.032)	0.0154 (0.0011)	0.0395 (0.001)	0.0011 (0.0004)	0.002 (0.0017)	0.003 (0.0017)	0.0004 (0.0005)	0.0011 (0.0014)	0.0019 (0.0017)	0.0006 (0.0005)	0.0012 (0.0015)	0.002 (0.0017)	0.0009 (0.0003)	0.0012 (0.0006)	0.0012 (0.0006)
CV3	MGE4SL	50	dep	0.4668 (0.0448)	0.0204 (0.0031)	0.0459 (0.0039)	0.0001 (0.0002)	0.0004 (0.0008)	0.0006 (0.0011)	0.0001 (0.0002)	0.0006 (0.0012)	0.001 (0.002)	0.0001 (0.0002)	0.0006 (0.0012)	0.001 (0.002)	0.0 (0.0001)	0.0001 (0.0002)	0.0001 (0.0003)

## Sheet: KG4SL
Strategy	Model	neg/pos	NSM	AUROC	F1	AUPR	NDCG@10	NDCG@20	NDCG@50	Recall@10	Recall@20	Recall@50	Precision@10	Precision@20	Precision@50	MAP@10	MAP@20	MAP@50
CV1	KG4SL	1	random	0.941 (0.0024)	0.9502 (0.0022)	0.8783 (0.0038)	0.2505 (0.011)	0.2706 (0.0109)	0.2853 (0.0112)	0.3347 (0.0075)	0.3863 (0.0084)	0.4253 (0.0097)	0.3357 (0.0077)	0.3866 (0.0084)	0.4254 (0.0097)	0.2175 (0.014)	0.2228 (0.0135)	0.2208 (0.0135)
CV2	KG4SL	1	random	0.8062 (0.0386)	0.8393 (0.0298)	0.74 (0.0329)	0.1082 (0.0166)	0.1128 (0.0185)	0.1203 (0.0196)	0.1402 (0.0259)	0.15 (0.0302)	0.1644 (0.0322)	0.1428 (0.026)	0.151 (0.0302)	0.1646 (0.0322)	0.0902 (0.0123)	0.0907 (0.0125)	0.0887 (0.0127)
CV3	KG4SL	1	random	0.5625 (0.0658)	0.5752 (0.0577)	0.667 (0.0003)	0.0 (0.0)	0.0 (0.0)	0.0 (0.0)	0.0 (0.0)	0.0 (0.0)	0.0 (0.0)	0.0 (0.0)	0.0 (0.0)	0.0 (0.0)	0.0 (0.0)	0.0 (0.0)	0.0 (0.0)
CV1	KG4SL	5	random	0.9402 (0.0009)	0.8582 (0.0037)	0.8065 (0.004)	0.2529 (0.0126)	0.2726 (0.0132)	0.2891 (0.0121)	0.3344 (0.0086)	0.3849 (0.0106)	0.4287 (0.0079)	0.3353 (0.0087)	0.3851 (0.0106)	0.4287 (0.0079)	0.2211 (0.0155)	0.2261 (0.0154)	0.2242 (0.0147)
CV2	KG4SL	5	random	0.8191 (0.0388)	0.6357 (0.0534)	0.5783 (0.0403)	0.1171 (0.0185)	0.1215 (0.0201)	0.1289 (0.0213)	0.1405 (0.0261)	0.1502 (0.0309)	0.1642 (0.0329)	0.1432 (0.0261)	0.1513 (0.0308)	0.1645 (0.0329)	0.1022 (0.0174)	0.1023 (0.0173)	0.0998 (0.0165)
CV3	KG4SL	5	random	0.5302 (0.048)	0.1922 (0.0289)	0.3025 (0.0311)	0.0 (0.0)	0.0 (0.0)	0.0 (0.0)	0.0 (0.0)	0.0 (0.0)	0.0 (0.0)	0.0 (0.0)	0.0 (0.0)	0.0 (0.0)	0.0 (0.0)	0.0 (0.0)	0.0 (0.0)
CV1	KG4SL	20	random	0.9278 (0.0034)	0.6991 (0.0077)	0.6924 (0.006)	0.2502 (0.0103)	0.268 (0.0112)	0.2865 (0.0109)	0.3338 (0.0069)	0.3778 (0.0089)	0.4255 (0.0087)	0.3347 (0.007)	0.3781 (0.0089)	0.4256 (0.0087)	0.2187 (0.0134)	0.2236 (0.0133)	0.2215 (0.0128)
CV2	KG4SL	20	random	0.8151 (0.035)	0.4229 (0.0529)	0.4341 (0.0404)	0.1133 (0.0188)	0.1181 (0.0202)	0.1255 (0.0218)	0.1383 (0.0266)	0.1484 (0.03)	0.162 (0.0329)	0.1411 (0.0267)	0.1495 (0.03)	0.1623 (0.0329)	0.0982 (0.0161)	0.0985 (0.0162)	0.096 (0.0156)
CV3	KG4SL	20	random	0.4557 (0.0439)	0.0534 (0.0096)	0.1024 (0.0107)	0.0 (0.0)	0.0 (0.0)	0.0 (0.0)	0.0 (0.0)	0.0 (0.0)	0.0 (0.0)	0.0 (0.0)	0.0 (0.0)	0.0 (0.0)	0.0 (0.0)	0.0 (0.0)	0.0 (0.0)
CV1	KG4SL	50	random	0.5572 (0.0516)	0.1049 (0.0426)	0.2241 (0.0649)	0.0432 (0.0288)	0.0506 (0.0284)	0.0775 (0.0319)	0.0565 (0.0343)	0.0731 (0.0327)	0.1601 (0.0657)	0.0568 (0.0344)	0.0732 (0.0328)	0.1601 (0.0658)	0.0354 (0.0258)	0.037 (0.0253)	0.0394 (0.0243)
CV2	KG4SL	50	random	0.6319 (0.0776)	0.1405 (0.0573)	0.2144 (0.044)	0.0806 (0.0429)	0.0845 (0.042)	0.0912 (0.0392)	0.0672 (0.0347)	0.0726 (0.034)	0.0846 (0.0279)	0.0696 (0.0356)	0.0734 (0.0342)	0.0849 (0.028)	0.0807 (0.0413)	0.0802 (0.0403)	0.0784 (0.0384)
CV3	KG4SL	50	random	0.5047 (0.0388)	0.0224 (0.0033)	0.0521 (0.0132)	0.0 (0.0)	0.0 (0.0)	0.0 (0.0)	0.0 (0.0)	0.0 (0.0)	0.0 (0.0)	0.0 (0.0)	0.0 (0.0)	0.0 (0.0)	0.0 (0.0)	0.0 (0.0)	0.0 (0.0)
CV1	KG4SL	1	exp	0.9894 (0.0004)	0.9906 (0.0003)	0.9542 (0.0016)	0.2311 (0.0114)	0.2472 (0.0145)	0.2687 (0.0129)	0.2961 (0.0056)	0.3346 (0.0123)	0.4035 (0.0072)	0.2969 (0.0055)	0.3348 (0.0123)	0.4036 (0.0072)	0.2036 (0.0157)	0.2077 (0.0167)	0.2051 (0.0156)
CV2	KG4SL	1	exp	0.918 (0.0119)	0.9228 (0.012)	0.8435 (0.0106)	0.109 (0.0196)	0.1133 (0.0201)	0.125 (0.0227)	0.1151 (0.0213)	0.1261 (0.0223)	0.1555 (0.0299)	0.1183 (0.0215)	0.1271 (0.0223)	0.1558 (0.0299)	0.103 (0.0182)	0.104 (0.0183)	0.0995 (0.0168)
CV3	KG4SL	1	exp	0.558 (0.0975)	0.6021 (0.0583)	0.6893 (0.024)	0.0 (0.0)	0.0 (0.0)	0.0 (0.0)	0.0 (0.0)	0.0 (0.0)	0.0 (0.0)	0.0 (0.0)	0.0 (0.0)	0.0 (0.0)	0.0 (0.0)	0.0 (0.0)	0.0 (0.0)
CV1	KG4SL	5	exp	0.9844 (0.0006)	0.9657 (0.0008)	0.9203 (0.0023)	0.2315 (0.0025)	0.2422 (0.0026)	0.2583 (0.0035)	0.3002 (0.0055)	0.3213 (0.0067)	0.3645 (0.0096)	0.301 (0.0054)	0.3214 (0.0067)	0.3646 (0.0096)	0.2005 (0.0037)	0.2035 (0.0032)	0.2007 (0.0032)
CV2	KG4SL	5	exp	0.9294 (0.0081)	0.8169 (0.0217)	0.7317 (0.0243)	0.1103 (0.0187)	0.1127 (0.0192)	0.1205 (0.0202)	0.115 (0.0213)	0.1194 (0.022)	0.1345 (0.0236)	0.1182 (0.0216)	0.1204 (0.0219)	0.1348 (0.0236)	0.102 (0.0179)	0.1028 (0.018)	0.0988 (0.0171)
CV3	KG4SL	5	exp	0.5385 (0.0419)	0.2141 (0.0301)	0.313 (0.0191)	0.0 (0.0)	0.0 (0.0)	0.0 (0.0)	0.0 (0.0)	0.0 (0.0)	0.0 (0.0)	0.0 (0.0)	0.0 (0.0)	0.0 (0.0)	0.0 (0.0)	0.0 (0.0)	0.0 (0.0)
CV1	KG4SL	20	exp	0.9643 (0.0015)	0.8603 (0.0067)	0.805 (0.0055)	0.2186 (0.0111)	0.2339 (0.008)	0.2547 (0.0078)	0.2841 (0.0141)	0.3217 (0.0041)	0.3816 (0.0033)	0.2849 (0.0141)	0.3219 (0.004)	0.3816 (0.0033)	0.1933 (0.0081)	0.1953 (0.009)	0.1921 (0.0097)
CV2	KG4SL	20	exp	0.9002 (0.0097)	0.5698 (0.0347)	0.5406 (0.0297)	0.104 (0.0199)	0.1083 (0.0201)	0.1195 (0.0222)	0.1113 (0.0217)	0.1206 (0.022)	0.1492 (0.0297)	0.1144 (0.0221)	0.1216 (0.022)	0.1495 (0.0297)	0.0974 (0.0175)	0.0967 (0.0176)	0.0927 (0.0165)
CV3	KG4SL	20	exp	0.4827 (0.0578)	0.0546 (0.0094)	0.109 (0.0165)	0.0 (0.0)	0.0 (0.0)	0.0 (0.0)	0.0 (0.0)	0.0 (0.0)	0.0 (0.0)	0.0 (0.0)	0.0 (0.0)	0.0 (0.0)	0.0 (0.0)	0.0 (0.0)	0.0 (0.0)
CV1	KG4SL	50	exp	0.6091 (0.0636)	0.1244 (0.0462)	0.2462 (0.0533)	0.05 (0.0489)	0.0609 (0.0457)	0.0839 (0.0433)	0.0658 (0.0529)	0.0925 (0.0458)	0.164 (0.0444)	0.0662 (0.053)	0.0927 (0.0458)	0.164 (0.0444)	0.0396 (0.0446)	0.0427 (0.0432)	0.0452 (0.0417)
CV2	KG4SL	50	exp	0.6904 (0.0833)	0.1853 (0.0823)	0.2476 (0.075)	0.0801 (0.0427)	0.0834 (0.0434)	0.0901 (0.0425)	0.0647 (0.0347)	0.0697 (0.036)	0.0823 (0.0329)	0.0673 (0.0356)	0.0705 (0.0361)	0.0826 (0.0329)	0.0758 (0.0406)	0.0748 (0.0396)	0.0724 (0.0378)
CV3	KG4SL	50	exp	0.5267 (0.0468)	0.0268 (0.0076)	0.0706 (0.0285)	0.0 (0.0)	0.0 (0.0)	0.0 (0.0001)	0.0 (0.0)	0.0 (0.0)	0.0002 (0.0004)	0.0 (0.0)	0.0 (0.0)	0.0002 (0.0004)	0.0 (0.0)	0.0 (0.0)	0.0 (0.0)
CV1	KG4SL	1	dep	0.9883 (0.0003)	0.9886 (0.0004)	0.9481 (0.0013)	0.2369 (0.0108)	0.255 (0.01)	0.275 (0.0085)	0.2854 (0.0204)	0.3314 (0.0117)	0.3912 (0.0063)	0.2861 (0.0204)	0.3316 (0.0117)	0.3913 (0.0063)	0.2174 (0.0104)	0.2224 (0.0104)	0.22 (0.0095)
CV2	KG4SL	1	dep	0.9377 (0.0105)	0.9411 (0.0099)	0.8751 (0.0111)	0.1 (0.0209)	0.106 (0.0225)	0.1142 (0.0243)	0.1157 (0.0234)	0.1305 (0.0282)	0.1477 (0.0326)	0.1188 (0.0236)	0.1314 (0.0282)	0.1479 (0.0326)	0.0913 (0.0209)	0.0918 (0.0207)	0.0897 (0.0198)
CV3	KG4SL	1	dep	0.5648 (0.0599)	0.5929 (0.0753)	0.6836 (0.026)	0.0 (0.0)	0.0 (0.0)	0.0 (0.0)	0.0 (0.0)	0.0 (0.0)	0.0 (0.0)	0.0 (0.0)	0.0 (0.0)	0.0 (0.0)	0.0 (0.0)	0.0 (0.0)	0.0 (0.0)
CV1	KG4SL	5	dep	0.9775 (0.0007)	0.931 (0.0021)	0.8615 (0.003)	0.2142 (0.0049)	0.2345 (0.0037)	0.2555 (0.004)	0.274 (0.0109)	0.3309 (0.0079)	0.3926 (0.0086)	0.2746 (0.0109)	0.3311 (0.0079)	0.3926 (0.0086)	0.1915 (0.005)	0.1958 (0.0045)	0.1946 (0.004)
CV2	KG4SL	5	dep	0.9035 (0.0159)	0.7471 (0.0339)	0.659 (0.0315)	0.0881 (0.0183)	0.0967 (0.0161)	0.1072 (0.0201)	0.1059 (0.032)	0.1285 (0.0237)	0.1532 (0.0352)	0.1088 (0.0321)	0.1295 (0.0237)	0.1535 (0.0352)	0.0788 (0.0141)	0.0794 (0.0141)	0.0776 (0.0137)
CV3	KG4SL	5	dep	0.507 (0.0589)	0.2079 (0.0454)	0.3041 (0.0297)	0.0 (0.0)	0.0 (0.0)	0.0 (0.0)	0.0 (0.0)	0.0 (0.0)	0.0 (0.0)	0.0 (0.0)	0.0 (0.0)	0.0 (0.0)	0.0 (0.0)	0.0 (0.0)	0.0 (0.0)
CV1	KG4SL	20	dep	0.949 (0.0006)	0.745 (0.0058)	0.714 (0.005)	0.2246 (0.0081)	0.2417 (0.0075)	0.2621 (0.0087)	0.3096 (0.0089)	0.3543 (0.0071)	0.4139 (0.0073)	0.3104 (0.0089)	0.3546 (0.0071)	0.4139 (0.0073)	0.1937 (0.0111)	0.1969 (0.0105)	0.1957 (0.0103)
CV2	KG4SL	20	dep	0.8598 (0.0236)	0.4678 (0.0506)	0.4593 (0.0381)	0.0962 (0.0109)	0.1031 (0.0151)	0.1108 (0.0159)	0.126 (0.0214)	0.1432 (0.0329)	0.1584 (0.0341)	0.1289 (0.0215)	0.1442 (0.0329)	0.1586 (0.0341)	0.081 (0.0069)	0.082 (0.0079)	0.0804 (0.008)
CV3	KG4SL	20	dep	0.4334 (0.0315)	0.0496 (0.0088)	0.0985 (0.011)	0.0 (0.0)	0.0 (0.0)	0.0 (0.0)	0.0 (0.0)	0.0 (0.0)	0.0 (0.0)	0.0 (0.0)	0.0 (0.0)	0.0 (0.0)	0.0 (0.0)	0.0 (0.0)	0.0 (0.0)
CV1	KG4SL	50	dep	0.5952 (0.0475)	0.1068 (0.0358)	0.2156 (0.0314)	0.0447 (0.0361)	0.0638 (0.0381)	0.0813 (0.0362)	0.0546 (0.0351)	0.1091 (0.0498)	0.1608 (0.0472)	0.0549 (0.0351)	0.1092 (0.0498)	0.1608 (0.0472)	0.0384 (0.0371)	0.043 (0.0362)	0.0445 (0.0348)
CV2	KG4SL	50	dep	0.6785 (0.0517)	0.1547 (0.0563)	0.2189 (0.0434)	0.0792 (0.041)	0.0842 (0.0405)	0.0906 (0.0384)	0.0671 (0.0366)	0.0763 (0.0344)	0.088 (0.0287)	0.0697 (0.0375)	0.0772 (0.0346)	0.0882 (0.0287)	0.0741 (0.0378)	0.0734 (0.0363)	0.0719 (0.0349)
CV3	KG4SL	50	dep	0.4932 (0.0892)	0.0268 (0.0094)	0.0658 (0.0215)	0.0 (0.0)	0.0 (0.0)	0.0 (0.0001)	0.0 (0.0)	0.0 (0.0)	0.0002 (0.0004)	0.0 (0.0)	0.0 (0.0)	0.0002 (0.0004)	0.0 (0.0)	0.0 (0.0)	0.0 (0.0)

## Sheet: GRSMF
Strategy	Model	neg/pos	NSM	AUROC	F1	AUPR	NDCG@10	NDCG@20	NDCG@50	Recall@10	Recall@20	Recall@50	Precision@10	Precision@20	Precision@50	MAP@10	MAP@20	MAP@50
CV1	GRSMF	1	random	0.906 (0.0029)	0.933 (0.0023)	0.8488 (0.0039)	0.2844 (0.0072)	0.2965 (0.007)	0.3153 (0.007)	0.3659 (0.0081)	0.3973 (0.0088)	0.446 (0.008)	0.3683 (0.0082)	0.398 (0.0088)	0.4461 (0.008)	0.2568 (0.007)	0.2574 (0.0068)	0.2521 (0.0061)
CV2	GRSMF	1	random	0.803 (0.0204)	0.8432 (0.0205)	0.7505 (0.0301)	0.104 (0.0162)	0.1074 (0.0173)	0.1149 (0.0186)	0.1208 (0.023)	0.1274 (0.0258)	0.1423 (0.028)	0.1236 (0.0229)	0.1284 (0.0258)	0.1425 (0.028)	0.0934 (0.0146)	0.0942 (0.0149)	0.0906 (0.0141)
CV3	GRSMF	1	random	0.6558 (0.0346)	0.6142 (0.0417)	0.6773 (0.0118)	0.0 (0.0)	0.0 (0.0001)	0.0 (0.0001)	0.0 (0.0)	0.0 (0.0)	0.0 (0.0)	0.0 (0.0)	0.0 (0.0)	0.0 (0.0)	0.0 (0.0)	0.0 (0.0)	0.0 (0.0)
CV1	GRSMF	5	random	0.9078 (0.0025)	0.8422 (0.0031)	0.8117 (0.0029)	0.2938 (0.0078)	0.3078 (0.0078)	0.3275 (0.0074)	0.369 (0.0067)	0.4047 (0.0082)	0.4554 (0.0071)	0.3737 (0.0069)	0.4071 (0.0082)	0.4556 (0.0071)	0.2675 (0.0083)	0.2683 (0.0082)	0.2624 (0.0074)
CV2	GRSMF	5	random	0.8042 (0.0209)	0.6284 (0.0431)	0.5895 (0.0407)	0.1041 (0.0161)	0.1076 (0.0172)	0.1151 (0.0184)	0.1208 (0.023)	0.1274 (0.0258)	0.142 (0.0281)	0.1236 (0.0229)	0.1285 (0.0257)	0.1423 (0.028)	0.0936 (0.0143)	0.0943 (0.0146)	0.0908 (0.014)
CV3	GRSMF	5	random	0.6535 (0.0356)	0.2505 (0.0415)	0.3622 (0.0351)	0.0 (0.0)	0.0 (0.0001)	0.0 (0.0001)	0.0 (0.0)	0.0 (0.0)	0.0 (0.0)	0.0 (0.0)	0.0 (0.0)	0.0 (0.0)	0.0 (0.0)	0.0 (0.0)	0.0 (0.0)
CV1	GRSMF	20	random	0.9099 (0.0028)	0.7587 (0.004)	0.7701 (0.0024)	0.3191 (0.0082)	0.3396 (0.0074)	0.3544 (0.0078)	0.3839 (0.0094)	0.4348 (0.0074)	0.4723 (0.0086)	0.3909 (0.0093)	0.4378 (0.0074)	0.4724 (0.0086)	0.2952 (0.0079)	0.2961 (0.0075)	0.2904 (0.0069)
CV2	GRSMF	20	random	0.8056 (0.0211)	0.4164 (0.0478)	0.4283 (0.037)	0.1042 (0.0162)	0.1083 (0.0172)	0.1154 (0.0184)	0.1209 (0.0229)	0.1288 (0.0249)	0.1416 (0.0276)	0.1237 (0.0229)	0.13 (0.0249)	0.1418 (0.0276)	0.0935 (0.0143)	0.0937 (0.0147)	0.0909 (0.014)
CV3	GRSMF	20	random	0.6552 (0.0341)	0.0784 (0.0173)	0.1569 (0.0395)	0.0 (0.0)	0.0 (0.0001)	0.0 (0.0001)	0.0 (0.0)	0.0 (0.0)	0.0 (0.0)	0.0 (0.0)	0.0 (0.0)	0.0 (0.0)	0.0 (0.0)	0.0 (0.0)	0.0 (0.0)
CV1	GRSMF	50	random	0.9114 (0.0025)	0.705 (0.0042)	0.7133 (0.0027)	0.3347 (0.0086)	0.3543 (0.0076)	0.3683 (0.0079)	0.3925 (0.0104)	0.4432 (0.0074)	0.4795 (0.0086)	0.4008 (0.0104)	0.4464 (0.0074)	0.4797 (0.0086)	0.3131 (0.0079)	0.3125 (0.0075)	0.3057 (0.0072)
CV2	GRSMF	50	random	0.8066 (0.0208)	0.2916 (0.043)	0.3359 (0.035)	0.1047 (0.0163)	0.1097 (0.0175)	0.1157 (0.0187)	0.1214 (0.0225)	0.13 (0.0258)	0.1396 (0.0271)	0.1242 (0.0225)	0.1314 (0.0258)	0.1399 (0.0271)	0.0933 (0.0144)	0.0925 (0.0143)	0.0911 (0.0139)
CV3	GRSMF	50	random	0.6573 (0.0327)	0.0334 (0.0078)	0.0779 (0.0252)	0.0 (0.0)	0.0 (0.0001)	0.0 (0.0001)	0.0 (0.0)	0.0 (0.0)	0.0 (0.0)	0.0 (0.0)	0.0 (0.0)	0.0 (0.0)	0.0 (0.0)	0.0 (0.0)	0.0 (0.0)
CV1	GRSMF	1	exp	0.9067 (0.0023)	0.9354 (0.0012)	0.8593 (0.0019)	0.2826 (0.006)	0.2952 (0.006)	0.3121 (0.0064)	0.3644 (0.0068)	0.396 (0.0071)	0.4405 (0.0087)	0.3665 (0.0069)	0.3966 (0.0072)	0.4406 (0.0087)	0.2549 (0.0057)	0.2556 (0.0055)	0.2502 (0.0054)
CV2	GRSMF	1	exp	0.8081 (0.0231)	0.8562 (0.0184)	0.7603 (0.0286)	0.1036 (0.0166)	0.1072 (0.0175)	0.1148 (0.0187)	0.1206 (0.023)	0.1274 (0.0258)	0.1422 (0.0279)	0.1234 (0.023)	0.1284 (0.0258)	0.1425 (0.0279)	0.093 (0.0151)	0.0937 (0.0153)	0.0902 (0.0146)
CV3	GRSMF	1	exp	0.6997 (0.05)	0.6984 (0.074)	0.7071 (0.0245)	0.0 (0.0)	0.0 (0.0001)	0.0 (0.0001)	0.0 (0.0)	0.0 (0.0)	0.0 (0.0)	0.0 (0.0)	0.0 (0.0)	0.0 (0.0)	0.0 (0.0)	0.0 (0.0)	0.0 (0.0)
CV1	GRSMF	5	exp	0.9063 (0.0024)	0.8497 (0.0028)	0.8198 (0.003)	0.2842 (0.0056)	0.2963 (0.0058)	0.3135 (0.0063)	0.3659 (0.006)	0.3966 (0.0069)	0.442 (0.0085)	0.3681 (0.0061)	0.3973 (0.0069)	0.4421 (0.0085)	0.2569 (0.0057)	0.2574 (0.0057)	0.2517 (0.0052)
CV2	GRSMF	5	exp	0.8117 (0.0204)	0.6651 (0.0305)	0.6359 (0.0367)	0.1041 (0.0162)	0.1076 (0.0172)	0.1153 (0.0187)	0.1208 (0.023)	0.1274 (0.0258)	0.1426 (0.0284)	0.1235 (0.023)	0.1285 (0.0257)	0.1429 (0.0284)	0.0936 (0.0144)	0.0942 (0.0146)	0.0906 (0.0138)
CV3	GRSMF	5	exp	0.6921 (0.0433)	0.3387 (0.0981)	0.4166 (0.0551)	0.0 (0.0)	0.0 (0.0001)	0.0 (0.0001)	0.0 (0.0)	0.0 (0.0)	0.0 (0.0)	0.0 (0.0)	0.0 (0.0)	0.0 (0.0)	0.0 (0.0)	0.0 (0.0)	0.0 (0.0)
CV1	GRSMF	20	exp	0.9059 (0.0023)	0.7671 (0.0053)	0.7667 (0.0051)	0.2894 (0.0064)	0.3024 (0.0066)	0.3218 (0.0071)	0.3662 (0.007)	0.4016 (0.0075)	0.4492 (0.0093)	0.3689 (0.007)	0.4025 (0.0076)	0.4494 (0.0093)	0.2642 (0.006)	0.2642 (0.0063)	0.2572 (0.0062)
CV2	GRSMF	20	exp	0.8142 (0.0188)	0.4681 (0.0352)	0.4788 (0.0254)	0.1038 (0.0165)	0.1078 (0.0172)	0.1153 (0.0189)	0.12 (0.0233)	0.1282 (0.0251)	0.1419 (0.0284)	0.1228 (0.0233)	0.1293 (0.0251)	0.1421 (0.0284)	0.0934 (0.0144)	0.0939 (0.0148)	0.0907 (0.0137)
CV3	GRSMF	20	exp	0.6781 (0.0419)	0.1124 (0.05)	0.2024 (0.0729)	0.0 (0.0)	0.0 (0.0001)	0.0 (0.0001)	0.0 (0.0)	0.0 (0.0)	0.0 (0.0)	0.0 (0.0)	0.0 (0.0)	0.0 (0.0)	0.0 (0.0)	0.0 (0.0)	0.0 (0.0)
CV1	GRSMF	50	exp	0.9062 (0.0023)	0.7149 (0.0068)	0.7173 (0.0062)	0.3064 (0.0064)	0.3238 (0.0067)	0.3419 (0.007)	0.3737 (0.0069)	0.4192 (0.0077)	0.4626 (0.0095)	0.3789 (0.007)	0.4217 (0.0077)	0.4628 (0.0096)	0.2827 (0.0063)	0.283 (0.0067)	0.277 (0.0064)
CV2	GRSMF	50	exp	0.815 (0.0184)	0.3411 (0.0348)	0.3788 (0.0271)	0.1035 (0.0162)	0.1086 (0.0172)	0.1154 (0.0187)	0.1187 (0.0222)	0.1297 (0.0254)	0.1404 (0.0278)	0.1215 (0.0222)	0.1308 (0.0253)	0.1407 (0.0278)	0.0933 (0.0143)	0.0932 (0.0148)	0.0907 (0.0139)
CV3	GRSMF	50	exp	0.6756 (0.0419)	0.0474 (0.0223)	0.1118 (0.0543)	0.0 (0.0)	0.0 (0.0001)	0.0 (0.0001)	0.0 (0.0)	0.0 (0.0)	0.0 (0.0)	0.0 (0.0)	0.0 (0.0)	0.0 (0.0)	0.0 (0.0)	0.0 (0.0)	0.0 (0.0)
CV1	GRSMF	1	dep	0.8849 (0.0026)	0.9175 (0.0019)	0.8399 (0.0023)	0.2826 (0.0056)	0.2953 (0.0057)	0.312 (0.0059)	0.3643 (0.0069)	0.3963 (0.0075)	0.4412 (0.0085)	0.3664 (0.007)	0.3969 (0.0075)	0.4413 (0.0085)	0.2549 (0.0052)	0.2557 (0.0051)	0.2504 (0.0052)
CV2	GRSMF	1	dep	0.774 (0.0305)	0.8253 (0.0282)	0.7271 (0.035)	0.104 (0.0162)	0.1075 (0.0172)	0.1151 (0.0185)	0.1206 (0.023)	0.1274 (0.0258)	0.142 (0.028)	0.1234 (0.023)	0.1284 (0.0258)	0.1423 (0.0279)	0.0937 (0.0143)	0.0944 (0.0146)	0.0908 (0.0139)
CV3	GRSMF	1	dep	0.5302 (0.0844)	0.5497 (0.1128)	0.683 (0.0261)	0.0 (0.0)	0.0 (0.0001)	0.0 (0.0001)	0.0 (0.0)	0.0 (0.0)	0.0 (0.0)	0.0 (0.0)	0.0 (0.0)	0.0 (0.0)	0.0 (0.0)	0.0 (0.0)	0.0 (0.0)
CV1	GRSMF	5	dep	0.8922 (0.0023)	0.8178 (0.0027)	0.7912 (0.004)	0.2839 (0.0057)	0.296 (0.006)	0.3133 (0.0064)	0.3661 (0.007)	0.3973 (0.0078)	0.443 (0.0094)	0.3683 (0.0071)	0.398 (0.0078)	0.4431 (0.0094)	0.2571 (0.0057)	0.2573 (0.0054)	0.2513 (0.0055)
CV2	GRSMF	5	dep	0.7887 (0.0257)	0.6168 (0.0445)	0.5873 (0.0428)	0.1038 (0.0163)	0.1073 (0.0173)	0.1151 (0.0186)	0.1206 (0.023)	0.1272 (0.0259)	0.1424 (0.0281)	0.1234 (0.023)	0.1282 (0.0259)	0.1427 (0.0281)	0.0937 (0.0143)	0.0945 (0.0145)	0.0907 (0.0138)
CV3	GRSMF	5	dep	0.5727 (0.0676)	0.2278 (0.0933)	0.3322 (0.0578)	0.0 (0.0)	0.0 (0.0001)	0.0 (0.0001)	0.0 (0.0)	0.0 (0.0)	0.0 (0.0)	0.0 (0.0)	0.0 (0.0)	0.0 (0.0)	0.0 (0.0)	0.0 (0.0)	0.0 (0.0)
CV1	GRSMF	20	dep	0.9002 (0.0022)	0.7296 (0.0053)	0.7274 (0.0036)	0.2969 (0.0062)	0.3117 (0.0062)	0.331 (0.0064)	0.3699 (0.0083)	0.4082 (0.0081)	0.4572 (0.009)	0.3744 (0.0084)	0.4104 (0.0082)	0.4574 (0.009)	0.2729 (0.0053)	0.2723 (0.0053)	0.2656 (0.0055)
CV2	GRSMF	20	dep	0.8004 (0.0222)	0.4197 (0.0466)	0.4264 (0.0341)	0.1039 (0.0163)	0.1076 (0.0173)	0.1151 (0.0186)	0.1206 (0.023)	0.1277 (0.0256)	0.142 (0.0284)	0.1233 (0.023)	0.1287 (0.0256)	0.1423 (0.0284)	0.0936 (0.0143)	0.0944 (0.0145)	0.0906 (0.0138)
CV3	GRSMF	20	dep	0.6187 (0.0508)	0.0772 (0.0308)	0.1491 (0.0612)	0.0 (0.0)	0.0 (0.0001)	0.0 (0.0001)	0.0 (0.0)	0.0 (0.0)	0.0 (0.0)	0.0 (0.0)	0.0 (0.0)	0.0 (0.0)	0.0 (0.0)	0.0 (0.0)	0.0 (0.0)
CV1	GRSMF	50	dep	0.9053 (0.0024)	0.68 (0.0083)	0.6811 (0.0074)	0.321 (0.0078)	0.3403 (0.0076)	0.3555 (0.0074)	0.3854 (0.0089)	0.4326 (0.0083)	0.4713 (0.0085)	0.3921 (0.009)	0.4356 (0.0084)	0.4714 (0.0085)	0.2986 (0.0072)	0.2986 (0.0069)	0.2917 (0.0071)
CV2	GRSMF	50	dep	0.8042 (0.0211)	0.2983 (0.0416)	0.341 (0.0352)	0.1042 (0.0163)	0.1085 (0.0171)	0.1153 (0.0183)	0.1206 (0.023)	0.1287 (0.025)	0.1414 (0.0282)	0.1233 (0.023)	0.1298 (0.025)	0.1416 (0.0282)	0.0937 (0.0141)	0.0935 (0.0145)	0.0909 (0.0137)
CV3	GRSMF	50	dep	0.6374 (0.0421)	0.0337 (0.0118)	0.0775 (0.0363)	0.0 (0.0)	0.0 (0.0001)	0.0 (0.0001)	0.0 (0.0)	0.0 (0.0)	0.0 (0.0)	0.0 (0.0)	0.0 (0.0)	0.0 (0.0)	0.0 (0.0)	0.0 (0.0)	0.0 (0.0)

## Sheet: GCATSL
Strategy	Model	neg/pos	NSM	AUROC	F1	AUPR	NDCG@10	NDCG@20	NDCG@50	Recall@10	Recall@20	Recall@50	Precision@10	Precision@20	Precision@50	MAP@10	MAP@20	MAP@50
CV1	GCATSL	1	random	0.9429 (0.0019)	0.9512 (0.002)	0.8829 (0.0032)	0.2642 (0.0059)	0.2851 (0.0073)	0.2976 (0.008)	0.3363 (0.0085)	0.3891 (0.0158)	0.4203 (0.0193)	0.3372 (0.0086)	0.3894 (0.0158)	0.4204 (0.0194)	0.2354 (0.0077)	0.2408 (0.0082)	0.2382 (0.0071)
CV2	GCATSL	1	random	0.8386 (0.0337)	0.8647 (0.0264)	0.7749 (0.0362)	0.1215 (0.0193)	0.1267 (0.0217)	0.1322 (0.0227)	0.1394 (0.0264)	0.1468 (0.0304)	0.1537 (0.0324)	0.1422 (0.0264)	0.148 (0.0305)	0.1539 (0.0323)	0.1043 (0.0161)	0.1038 (0.0158)	0.1022 (0.0158)
CV3	GCATSL	1	random	0.6783 (0.0432)	0.6604 (0.0531)	0.6918 (0.0115)	0.002 (0.0011)	0.0027 (0.0014)	0.0046 (0.0024)	0.0016 (0.0011)	0.0021 (0.0016)	0.0043 (0.003)	0.0017 (0.0011)	0.0021 (0.0015)	0.0043 (0.003)	0.0012 (0.0007)	0.0014 (0.0007)	0.0015 (0.0007)
CV1	GCATSL	5	random	0.9352 (0.0019)	0.855 (0.0047)	0.8094 (0.0036)	0.261 (0.0058)	0.279 (0.0095)	0.2916 (0.0151)	0.337 (0.0074)	0.379 (0.0176)	0.4096 (0.032)	0.3379 (0.0075)	0.3793 (0.0176)	0.4097 (0.032)	0.2284 (0.012)	0.2326 (0.0126)	0.2308 (0.0118)
CV2	GCATSL	5	random	0.8438 (0.0415)	0.6675 (0.0535)	0.6169 (0.0448)	0.1242 (0.0227)	0.1273 (0.0229)	0.1307 (0.0224)	0.1387 (0.0255)	0.1443 (0.0267)	0.1494 (0.0258)	0.1413 (0.0255)	0.1452 (0.0267)	0.1496 (0.0258)	0.1053 (0.017)	0.1051 (0.0167)	0.1044 (0.0171)
CV3	GCATSL	5	random	0.6951 (0.0339)	0.3277 (0.033)	0.3824 (0.0319)	0.0082 (0.0102)	0.0114 (0.0137)	0.0146 (0.0167)	0.0109 (0.0173)	0.018 (0.0279)	0.0269 (0.0364)	0.011 (0.0173)	0.0181 (0.0279)	0.0269 (0.0364)	0.0049 (0.0055)	0.0058 (0.0064)	0.0063 (0.0069)
CV1	GCATSL	20	random	0.9197 (0.0061)	0.6765 (0.0054)	0.6849 (0.0167)	0.2681 (0.0119)	0.2831 (0.0072)	0.2936 (0.0042)	0.3358 (0.0066)	0.3704 (0.0073)	0.3942 (0.0248)	0.3367 (0.0067)	0.3707 (0.0073)	0.3943 (0.0248)	0.2351 (0.0072)	0.2382 (0.006)	0.2376 (0.0062)
CV2	GCATSL	20	random	0.8306 (0.0229)	0.4423 (0.0513)	0.4558 (0.0409)	0.1269 (0.0219)	0.1297 (0.0239)	0.131 (0.0242)	0.1392 (0.0264)	0.1442 (0.0295)	0.1458 (0.0301)	0.1418 (0.0266)	0.1449 (0.0295)	0.1459 (0.03)	0.1039 (0.0193)	0.104 (0.0191)	0.104 (0.019)
CV3	GCATSL	20	random	0.6446 (0.0398)	0.1234 (0.0362)	0.1968 (0.0531)	0.0167 (0.0245)	0.0198 (0.0254)	0.0242 (0.0256)	0.0057 (0.0042)	0.0099 (0.0059)	0.0184 (0.0094)	0.0059 (0.0043)	0.01 (0.006)	0.0184 (0.0094)	0.0152 (0.0239)	0.016 (0.0241)	0.0166 (0.024)
CV1	GCATSL	50	random	0.8986 (0.0136)	0.5149 (0.0211)	0.5432 (0.0132)	0.2609 (0.0092)	0.2749 (0.008)	0.2872 (0.0099)	0.3351 (0.0068)	0.3674 (0.0109)	0.3949 (0.0184)	0.336 (0.0069)	0.3676 (0.0109)	0.395 (0.0184)	0.2258 (0.0113)	0.2286 (0.0106)	0.2279 (0.0104)
CV2	GCATSL	50	random	0.7916 (0.0353)	0.2952 (0.0476)	0.3497 (0.0419)	0.1256 (0.0204)	0.1302 (0.0222)	0.1352 (0.0226)	0.1394 (0.0266)	0.1459 (0.0308)	0.1525 (0.0317)	0.142 (0.0269)	0.1468 (0.0309)	0.1528 (0.0317)	0.1045 (0.0163)	0.105 (0.0165)	0.1049 (0.0164)
CV3	GCATSL	50	random	0.5226 (0.0312)	0.0236 (0.0036)	0.0454 (0.0052)	0.0103 (0.0126)	0.0114 (0.0122)	0.0141 (0.0109)	0.0062 (0.0065)	0.0075 (0.006)	0.0129 (0.0046)	0.0065 (0.0064)	0.0076 (0.006)	0.013 (0.0046)	0.0092 (0.0124)	0.0093 (0.0124)	0.0097 (0.0122)
CV1	GCATSL	1	exp	0.9889 (0.0003)	0.9902 (0.0003)	0.957 (0.0013)	0.256 (0.0076)	0.2749 (0.0076)	0.2921 (0.0083)	0.3348 (0.0057)	0.379 (0.0065)	0.4209 (0.0063)	0.3357 (0.0057)	0.3794 (0.0065)	0.421 (0.0063)	0.2258 (0.0097)	0.2293 (0.0093)	0.2278 (0.0092)
CV2	GCATSL	1	exp	0.944 (0.009)	0.9458 (0.0092)	0.8859 (0.0107)	0.1207 (0.0201)	0.1263 (0.023)	0.132 (0.0236)	0.1378 (0.0232)	0.1462 (0.0273)	0.1552 (0.0288)	0.1406 (0.0232)	0.1474 (0.0272)	0.1554 (0.0288)	0.1043 (0.0158)	0.1038 (0.0158)	0.1023 (0.0155)
CV3	GCATSL	1	exp	0.7512 (0.0327)	0.7667 (0.0394)	0.7356 (0.0315)	0.0016 (0.0006)	0.0022 (0.0009)	0.0035 (0.001)	0.0014 (0.0013)	0.0032 (0.0027)	0.0052 (0.0031)	0.0015 (0.0012)	0.0032 (0.0027)	0.0052 (0.0031)	0.0012 (0.0006)	0.0014 (0.0007)	0.0016 (0.0007)
CV1	GCATSL	5	exp	0.9788 (0.0013)	0.9619 (0.004)	0.9271 (0.0052)	0.2547 (0.0049)	0.2751 (0.007)	0.2906 (0.0067)	0.3344 (0.0071)	0.3829 (0.0078)	0.4196 (0.0069)	0.3353 (0.0071)	0.3831 (0.0078)	0.4197 (0.0069)	0.2237 (0.0079)	0.2279 (0.008)	0.2262 (0.0078)
CV2	GCATSL	5	exp	0.9378 (0.0029)	0.8403 (0.018)	0.7881 (0.0151)	0.1193 (0.019)	0.1247 (0.0204)	0.1311 (0.022)	0.1377 (0.0267)	0.1482 (0.0307)	0.1602 (0.0346)	0.1405 (0.0268)	0.1495 (0.0307)	0.1605 (0.0346)	0.1055 (0.0174)	0.1049 (0.0171)	0.1032 (0.0165)
CV3	GCATSL	5	exp	0.7306 (0.0471)	0.4559 (0.0557)	0.4539 (0.0481)	0.0151 (0.0264)	0.0157 (0.0262)	0.0174 (0.0257)	0.0176 (0.0334)	0.0183 (0.0332)	0.0206 (0.0329)	0.0177 (0.0335)	0.0183 (0.0332)	0.0206 (0.0329)	0.0121 (0.0212)	0.0122 (0.0211)	0.0125 (0.021)
CV1	GCATSL	20	exp	0.9528 (0.0014)	0.8395 (0.0018)	0.7899 (0.0014)	0.2569 (0.0061)	0.2729 (0.0089)	0.2802 (0.015)	0.3323 (0.0055)	0.3692 (0.015)	0.3857 (0.0297)	0.3332 (0.0055)	0.3694 (0.015)	0.3858 (0.0297)	0.2197 (0.0144)	0.2228 (0.015)	0.2218 (0.0139)
CV2	GCATSL	20	exp	0.9097 (0.009)	0.5791 (0.0297)	0.5735 (0.0321)	0.1238 (0.023)	0.1275 (0.0229)	0.1307 (0.0227)	0.1344 (0.0286)	0.1417 (0.0313)	0.1458 (0.0326)	0.1369 (0.029)	0.1426 (0.0314)	0.146 (0.0327)	0.1055 (0.0173)	0.1054 (0.017)	0.1051 (0.0172)
CV3	GCATSL	20	exp	0.6872 (0.0522)	0.1473 (0.0471)	0.1972 (0.0487)	0.0139 (0.0143)	0.0149 (0.0143)	0.0178 (0.0151)	0.0068 (0.0077)	0.0073 (0.0076)	0.0115 (0.0104)	0.007 (0.0078)	0.0074 (0.0077)	0.0115 (0.0104)	0.0119 (0.0144)	0.0119 (0.0143)	0.0121 (0.0143)
CV1	GCATSL	50	exp	0.9298 (0.0043)	0.6986 (0.0103)	0.6726 (0.0054)	0.2543 (0.0061)	0.2691 (0.0035)	0.2817 (0.0084)	0.3217 (0.018)	0.3545 (0.0198)	0.3859 (0.015)	0.3225 (0.0179)	0.3548 (0.0198)	0.3859 (0.015)	0.2215 (0.0094)	0.2243 (0.009)	0.2233 (0.008)
CV2	GCATSL	50	exp	0.8437 (0.0054)	0.3797 (0.0257)	0.4127 (0.0257)	0.1197 (0.0201)	0.125 (0.0215)	0.1349 (0.0206)	0.1374 (0.0284)	0.1464 (0.0325)	0.1688 (0.0245)	0.1401 (0.0285)	0.1475 (0.0326)	0.1691 (0.0245)	0.1039 (0.0194)	0.1037 (0.0189)	0.1027 (0.0177)
CV3	GCATSL	50	exp	0.5693 (0.0784)	0.0536 (0.0525)	0.096 (0.0769)	0.0101 (0.0115)	0.0139 (0.0169)	0.0218 (0.0279)	0.0145 (0.0198)	0.0276 (0.042)	0.0512 (0.0823)	0.0147 (0.0198)	0.0277 (0.042)	0.0513 (0.0823)	0.0065 (0.0062)	0.0078 (0.0081)	0.0089 (0.0098)
CV1	GCATSL	1	dep	0.9885 (0.0001)	0.9885 (0.0003)	0.9501 (0.0015)	0.2631 (0.0035)	0.2819 (0.0042)	0.2969 (0.0035)	0.3323 (0.0063)	0.3753 (0.0109)	0.4133 (0.012)	0.3331 (0.0063)	0.3756 (0.011)	0.4134 (0.012)	0.2348 (0.0039)	0.2392 (0.0037)	0.237 (0.0034)
CV2	GCATSL	1	dep	0.9404 (0.0096)	0.9407 (0.0102)	0.891 (0.0086)	0.1217 (0.0196)	0.1273 (0.0209)	0.1335 (0.0227)	0.1405 (0.0261)	0.1515 (0.0292)	0.161 (0.0316)	0.1431 (0.0263)	0.1525 (0.0292)	0.1612 (0.0316)	0.1035 (0.0157)	0.1038 (0.0158)	0.1032 (0.0162)
CV3	GCATSL	1	dep	0.6829 (0.0329)	0.6832 (0.0386)	0.7062 (0.0189)	0.0007 (0.0005)	0.0013 (0.0007)	0.0032 (0.001)	0.0008 (0.0007)	0.0016 (0.0014)	0.005 (0.0033)	0.0009 (0.0007)	0.0017 (0.0014)	0.005 (0.0033)	0.0004 (0.0003)	0.0006 (0.0003)	0.0008 (0.0003)
CV1	GCATSL	5	dep	0.9771 (0.0006)	0.9275 (0.0023)	0.8631 (0.0028)	0.2624 (0.0043)	0.279 (0.0054)	0.2927 (0.0088)	0.3272 (0.0132)	0.3647 (0.0238)	0.4002 (0.0376)	0.328 (0.0132)	0.365 (0.0238)	0.4003 (0.0377)	0.2351 (0.0042)	0.2394 (0.0046)	0.2371 (0.0039)
CV2	GCATSL	5	dep	0.9119 (0.0141)	0.7667 (0.0342)	0.6966 (0.0302)	0.1208 (0.0196)	0.1247 (0.0219)	0.1314 (0.0255)	0.1359 (0.0261)	0.1435 (0.0314)	0.1535 (0.0365)	0.1386 (0.0262)	0.1445 (0.0315)	0.1538 (0.0365)	0.1054 (0.0169)	0.1056 (0.0167)	0.1036 (0.0167)
CV3	GCATSL	5	dep	0.6689 (0.0207)	0.3301 (0.0247)	0.391 (0.0216)	0.0011 (0.0004)	0.0016 (0.0007)	0.0034 (0.0009)	0.0026 (0.0038)	0.003 (0.004)	0.005 (0.0036)	0.0027 (0.0038)	0.003 (0.004)	0.005 (0.0036)	0.0021 (0.0028)	0.0021 (0.0029)	0.0024 (0.0028)
CV1	GCATSL	20	dep	0.9415 (0.0028)	0.6846 (0.0047)	0.6738 (0.0051)	0.2719 (0.0059)	0.2814 (0.0039)	0.2863 (0.0078)	0.3341 (0.0048)	0.3549 (0.0152)	0.3653 (0.0316)	0.3349 (0.0049)	0.3551 (0.0152)	0.3653 (0.0317)	0.2357 (0.0042)	0.238 (0.004)	0.2377 (0.004)
CV2	GCATSL	20	dep	0.8676 (0.017)	0.4873 (0.0436)	0.4989 (0.0301)	0.124 (0.0213)	0.1263 (0.0214)	0.1276 (0.0217)	0.1372 (0.0264)	0.1416 (0.0275)	0.1427 (0.0277)	0.1398 (0.0265)	0.1423 (0.0275)	0.1428 (0.0277)	0.1033 (0.0183)	0.1034 (0.0181)	0.1033 (0.0181)
CV3	GCATSL	20	dep	0.6368 (0.0226)	0.1252 (0.0299)	0.1864 (0.0459)	0.0357 (0.0435)	0.0374 (0.0433)	0.0396 (0.0433)	0.04 (0.0463)	0.0421 (0.0476)	0.0459 (0.047)	0.0405 (0.0468)	0.0423 (0.0478)	0.0459 (0.047)	0.0295 (0.0422)	0.0298 (0.0419)	0.0299 (0.0415)
CV1	GCATSL	50	dep	0.9016 (0.0157)	0.5152 (0.0194)	0.5466 (0.012)	0.2664 (0.003)	0.277 (0.006)	0.2873 (0.0049)	0.3208 (0.0035)	0.3422 (0.012)	0.3683 (0.0048)	0.3216 (0.0035)	0.3424 (0.012)	0.3684 (0.0048)	0.2342 (0.0043)	0.2361 (0.0044)	0.2354 (0.0042)
CV2	GCATSL	50	dep	0.8163 (0.025)	0.2984 (0.0419)	0.3603 (0.0379)	0.1254 (0.0217)	0.1302 (0.0223)	0.1367 (0.0234)	0.1463 (0.0307)	0.1541 (0.0322)	0.1628 (0.0346)	0.1489 (0.0306)	0.1551 (0.0322)	0.1631 (0.0346)	0.1067 (0.0174)	0.1065 (0.0168)	0.1055 (0.0168)
CV3	GCATSL	50	dep	0.5466 (0.0561)	0.0275 (0.0102)	0.0571 (0.0248)	0.0084 (0.0078)	0.009 (0.0078)	0.0106 (0.007)	0.0051 (0.0034)	0.0057 (0.0034)	0.0091 (0.0038)	0.0055 (0.0034)	0.0059 (0.0034)	0.0092 (0.0038)	0.0062 (0.0062)	0.0064 (0.0061)	0.0065 (0.006)

[truncated: 2 more sheets: DDGCN, CMFW]
